# Supplementary material for: Design, semi-synthesis and molecular docking of new antibacterial and antibiofilm triazole conjugates from hydroxy-triterpene acids and fluoroquinolones
Source: Royal Society of Chemistry journal article supplement (doi:10.1039/d3nj02922k), 2023-01-01
Supplement: d3nj02922k1.pdf [file d3nj02922k1.pdf]

# **Design, semi-synthesis and molecular docking of new antibacterial and antibiofilm triazole conjugates from hydroxy-triterpene acids and fluoroquinolones**

Besma Boulila<sup>†,‡</sup>, Mabrouk Horchani<sup>†</sup>, Raphael Duval<sup>§</sup>, Mohamed Othman<sup>‡</sup>, Adam Daïch<sup>‡</sup>, Hichem Ben Jannet<sup>†</sup>, Anis Romdhane<sup>†,\*</sup>, Ata Martin Lawson<sup>‡,\*</sup>

<sup>†</sup>University of Monastir, Faculty of Sciences of Monastir, Laboratory of Heterocyclic Chemistry, Natural Products and Reactivity (LR11ES39), Team: Medicinal Chemistry and Natural Products, Avenue of Environment, 5019 Monastir, Tunisia

<sup>‡</sup>Normandie Univ, UNILEHAVRE, URCOM, EA 3221, INC3M, FR 3038 CNRS, F-76600 Le Havre, France E-mail: [lawsona@univ-lehavre.fr](mailto:lawsona@univ-lehavre.fr)

<sup>§</sup>Université de Lorraine, CNRS, L2CM, F-54000 Nancy, France

## **Supporting Information**

### **Table of Contents**

|        |                                                                    |
|--------|--------------------------------------------------------------------|
| P. S2  | <b>I. General Experimental Details</b>                             |
| P. S2  | <b>II. General procedures for the synthesis of compounds 3-8</b>   |
| P. S5  | <b>III. General procedure for the synthesis of compounds 11a-k</b> |
| P. S8  | <b>IV. General procedure for the synthesis of compounds 13a-k</b>  |
| P. S13 | <b>V. General procedure for the synthesis of compounds 14a-k</b>   |
| P. S19 | <b>VI. NMR Spectra</b>                                             |

## I. General Experimental Details

Unless otherwise specified, all chemicals were purchased from commercial sources and used without further purification (Fisher scientific, Sigma-Aldrich, TCI).

All reactions were monitored by TLC on silica plates (0.20 mm silica gel 60 with UV<sub>254</sub> indicator) and visualized using a combination of UV light and/or an ethanolic solution of p-anisaldehyde as a staining solution. Purifications were performed using an automated purification system Büchi C-815 puriflash, using 200-800 nm UV scan and ELSD as a detector. <sup>1</sup>H NMR (300 MHz), <sup>13</sup>C proton decoupling (75 MHz), and <sup>19</sup>F (282 MHz) spectra were recorded on a Bruker Advance III 300 MHz spectrometer using TMS as the internal standard ( $\delta = 0$ ). All chemical compounds were reported as  $\delta$  values (ppm) and coupling constants (J) were expressed in Hz. Melting points were recorded on a scientific analyzer SMP 10 apparatus and are uncorrected. Optical rotations were measured on a JASCO PTC-262 polarimeter at 568.6 nm with a path length of 10 cm.  $[\alpha]$  is expressed in  $\text{deg}\cdot\text{cm}^3\cdot\text{g}^{-1}\cdot\text{dm}^{-1}$ , and  $c$  is expressed in  $\text{g}/100\text{ cm}^3$ . FT-IR spectra were recorded with a PerkinElmer Frontier. High-resolution mass spectra (HRMS) were measured on an Agilent 6530 QTOF-LC/MS mass analyzer in ESI<sup>+</sup>.

## II. General procedures for the synthesis of compounds 3-8

### General procedure for the synthesis of benzyl maslinate 3

BnBr (1.32 mL, 11.10 mmol) was added to a mixture of MA (3.50 g, 7.40 mmol) and K<sub>2</sub>CO<sub>3</sub> (1.53 g, 11.10 mmol) in DMF (30 mL). The reaction was stirred for 4 h at room temperature before it was diluted with water and extracted with CH<sub>2</sub>Cl<sub>2</sub>. The organic layer was dried with anhydrous Na<sub>2</sub>SO<sub>4</sub>, filtered, and concentrated. Purification by silica gel flash column chromatography (cyclohexane/AcOEt 7/3) afforded compound **3** as a white solid (4.08 g, 98%), mp: 167-169 °C. **IR** ( $\nu_{\text{max}} / \text{cm}^{-1}$ ): 3266, 2943, 1731, 1156, 695. **<sup>1</sup>H NMR (300 MHz, CDCl<sub>3</sub>)**:  $\delta_{\text{H}}$  7.37 - 7.29 (m, 5H), 5.29 (t,  $J = 3.2$  Hz, 1H), 5.12 - 5.02 (m, 2H), 3.73 - 3.64 (m, 1H), 3.01 - 2.97 (m, 1H), 2.94 - 2.88 (m, 1H), 2.32 - 2.29 (m, 2H), 2.03 - 1.86 (m, 4H), 1.75 - 1.48 (m, 8H), 1.44 - 1.17 (m, 7H), 1.12 (s, 3H), 1.02 (s, 3H), 0.94 (s, 3H), 0.92 (s, 3H), 0.90 (s, 3H), 0.81 (s, 3H), 0.60 (s, 3H). **<sup>13</sup>C NMR (75 MHz, CDCl<sub>3</sub>)**:  $\delta_{\text{C}}$  177.6, 143.9, 136.5, 128.5 (x2), 128.1 (x2), 128.0, 122.4, 84.0, 69.1, 66.1, 55.4, 47.7, 46.8, 46.5, 46.0, 41.8, 41.5, 39.5, 39.3, 38.4, 34.0, 33.2, 32.7, 32.5, 30.8, 28.7, 27.7, 26.0, 23.8, 23.6, 23.2, 18.5, 17.0, 16.9, 16.7. **HRMS (ESI<sup>+</sup>)**: Calcd for C<sub>37</sub>H<sub>54</sub>NaO<sub>4</sub> [M+Na]<sup>+</sup> 585.3920, found 585.3914.

### General procedure for the synthesis of benzyl oleanolate 4

BnBr (1.37 mL, 11.49 mmol) was added to a mixture of OA (3.50 g, 7.66 mmol) and K<sub>2</sub>CO<sub>3</sub> (1.59 g, 11.49 mmol) in DMF (30 mL). The reaction was stirred for 4 h at room temperature before it was diluted with water and extracted with CH<sub>2</sub>Cl<sub>2</sub>. The organic layer was dried with anhydrous Na<sub>2</sub>SO<sub>4</sub>, filtered, and concentrated. Purification by silica gel flash column chromatography (cyclohexane/AcOEt 9/1) afforded compound **4** as a white solid (3.98 g, 95%), mp: 195-197 °C. **IR** ( $\nu_{\max}$  /  $\text{cm}^{-1}$ ): 3583, 2921, 1725, 1162, 741. **<sup>1</sup>H NMR (300 MHz, CDCl<sub>3</sub>)**:  $\delta_{\text{H}}$  d 7.36 - 7.29 (m, 5H), 5.28 (t,  $J$  = 3.2 Hz, 1H), 5.12 - 5.01 (m, 2H), 3.22 - 3.12 (m, 1H), 2.95 - 2.88 (m, 1H), 2.03 - 1.92 (m, 1H), 1.86 - 1.82 (m, 2H), 1.77 - 1.46 (m, 12H), 1.42 - 1.16 (m, 8H), 1.12 (s, 3H), 0.97 (s, 3H), 0.91 (s, 3H), 0.89 (s, 3H), 0.87 (s, 3H), 0.77 (s, 3H), 0.60 (s, 3H). **<sup>13</sup>C NMR (75 MHz, CDCl<sub>3</sub>)**:  $\delta_{\text{C}}$  177.6, 143.8, 136.6, 128.6 (x2), 128.1 (x2), 128.0, 122.6, 79.2, 66.1, 55.4, 47.8, 46.9, 46.0, 41.8, 41.5, 39.4, 38.9, 38.6, 37.2, 34.0, 33.3, 32.9, 32.5, 30.9, 28.3, 27.8, 27.4, 26.0, 23.8, 23.6, 23.2, 18.5, 17.0, 15.7, 15.5. **HRMS (ESI<sup>+</sup>)**: Calcd for C<sub>37</sub>H<sub>54</sub>NaO<sub>3</sub> [M+Na]<sup>+</sup> 569.3971, found 569.3973.

#### General procedure for the synthesis of compound **5**

To a solution of benzyl maslinate **3** (3.00 g, 5.33 mmol), pyridine (1.29 mL, 16 mmol) and DMAP (cat.) in CH<sub>2</sub>Cl<sub>2</sub> (50 mL) was added chloroacetyl chloride (1.28 mL, 16 mmol) dropwise over a period of 30 min at 0 °C. The reaction mixture was stirred at room temperature for 4 h then diluted with water and extracted with CH<sub>2</sub>Cl<sub>2</sub>. The organic layers were washed with saturated sodium bicarbonate solution and brine, dried with anhydrous Na<sub>2</sub>SO<sub>4</sub>, filtered, and concentrated. Purification by silica gel flash column chromatography (cyclohexane/AcOEt 8/2) gave compound **7** as a white solid (2.48 g, 65%), mp: 89-91 °C. **IR** ( $\nu_{\max}$  /  $\text{cm}^{-1}$ ): 2946, 1729, 1159, 994, 695. **<sup>1</sup>H NMR (300 MHz, CDCl<sub>3</sub>)**:  $\delta_{\text{H}}$  7.37 - 7.30 (m, 5H), 5.27 (t,  $J$  = 3.2 Hz, 1H), 5.22 - 5.12 (m, 1H), 5.12 - 5.01 (m, 2H), 4.85 (d,  $J$  = 10.3 Hz, 1H), 4.04 (s, 2H), 3.95 (s, 2H), 2.91 (dd,  $J$  = 13.6, 3.8 Hz, 1H), 2.10 - 2.04 (m, 1H), 1.94 - 1.82 (m, 2H), 1.72 - 1.49 (m, 8H), 1.45 - 1.39 (m, 5H), 1.34 - 1.20 (m, 4H), 1.11 (s, 3H), 1.03 (s, 3H), 0.92 (s, 9H), 0.90 (s, 3H), 0.58 (s, 3H). **<sup>13</sup>C NMR (75 MHz, CDCl<sub>3</sub>)**:  $\delta_{\text{C}}$  177.4, 167.3, 167.0, 144.0, 136.5, 128.5 (x2), 128.1 (x2), 128.1, 122.0, 82.4, 72.3, 66.1, 54.9, 47.6, 46.8, 45.9, 43.7, 41.8, 41.4, 41.0, 40.9, 39.7, 39.4, 38.3, 34.0, 33.2, 32.5, 32.4, 30.8, 28.5, 27.6, 26.0, 23.8, 23.6, 23.1, 18.3, 17.7, 16.9, 16.5. **HRMS (ESI<sup>+</sup>)**: Calcd for C<sub>41</sub>H<sub>57</sub>Cl<sub>2</sub>O<sub>6</sub> [M+H]<sup>+</sup> 715.3532, found 715.3515.

#### General procedure for the synthesis of compound **6**

To a solution of benzyl oleanolate **4** (3.00 g, 5.48 mmol), pyridine (665  $\mu$ L, 8.23 mmol) and DMAP (cat.) in CH<sub>2</sub>Cl<sub>2</sub> (50 mL) was added chloroacetyl chloride (656  $\mu$ L, 8.23 mmol)

dropwise over a period of 30 min at 0 °C. The reaction mixture was stirred at room temperature for 4 h then diluted with water and extracted with CH<sub>2</sub>Cl<sub>2</sub>. The organic layers were washed with saturated sodium bicarbonate solution and brine, dried with anhydrous Na<sub>2</sub>SO<sub>4</sub>, filtered, and concentrated to give compound **6** as a white solid (2.56 g, 75%), mp: 168-170 °C. **IR** ( $\nu_{\max}$  / cm<sup>-1</sup>): 2946, 1729, 1159, 994, 695. **<sup>1</sup>H NMR (300 MHz, CDCl<sub>3</sub>)**:  $\delta_{\text{H}}$  d 7.37 - 7.30 (m, 5H), 5.27 (t,  $J$  = 3.2 Hz, 1H), 5.22 - 5.12 (m, 1H), 5.12 - 5.01 (m, 2H), 4.85 (d,  $J$  = 10.3 Hz, 1H), 4.04 (s, 2H), 3.95 (s, 2H), 2.91 (dd,  $J$  = 13.6, 3.8 Hz, 1H), 2.10 - 2.04 (m, 1H), 1.94 - 1.82 (m, 2H), 1.72 - 1.49 (m, 8H), 1.45 - 1.39 (m, 5H), 1.34 - 1.20 (m, 4H), 1.11 (s, 3H), 1.03 (s, 3H), 0.92 (s, 9H), 0.90 (s, 3H), 0.58 (s, 3H). **<sup>13</sup>C NMR (75 MHz, CDCl<sub>3</sub>)**:  $\delta_{\text{C}}$  177.4, 167.3, 167.0, 144.0, 136.5, 128.5 (x2), 128.1 (x2), 128.1, 122.0, 82.4, 72.3, 66.1, 54.9, 47.6, 46.8, 45.9, 43.7, 41.8, 41.4, 41.0, 40.9, 39.7, 39.4, 38.3, 34.0, 33.2, 32.5, 32.4, 30.8, 28.5, 27.6, 26.0, 23.8, 23.6, 23.1, 18.3, 17.7, 16.9, 16.5. **HRMS (ESI<sup>+</sup>)**: Calcd for C<sub>41</sub>H<sub>57</sub>Cl<sub>2</sub>O<sub>6</sub> [M+H]<sup>+</sup> 715.3532, found 715.3515.

#### General procedure for the synthesis of compound **7**

Sodium azide (0.54 g, 8.38 mmol) was added portion-wise to a solution of compound **5** (2.00 g, 2.80 mmol). The reaction mixture was stirred for 6 h at 75 °C then quenched with water and extracted with CH<sub>2</sub>Cl<sub>2</sub>. The organic layers were dried over anhydrous Na<sub>2</sub>SO<sub>4</sub> and concentrated under reduced pressure. The residue was purified by silica gel flash column chromatography (cyclohexane/AcOEt 8/2) to afford compound **7** as a yellow solid (1.53 g, 75%), mp: 93-95 °C. **IR** ( $\nu_{\max}$  / cm<sup>-1</sup>): 2945, 2107, 1737, 1180, 739. **<sup>1</sup>H NMR (300 MHz, CDCl<sub>3</sub>)**:  $\delta_{\text{H}}$  7.38 - 7.32 (m, 5H), 5.29 - 5.18 (m, 2H), 5.12 - 5.02 (m, 2H), 4.87 (d,  $J$  = 10.2 Hz, 1H), 3.87 (s, 2H), 3.78 (s, 2H), 2.96 - 2.88 (m, 1H), 2.10 - 1.85 (m, 4H), 1.71 - 1.53 (m, 8H), 1.42 - 1.21 (m, 8H), 1.12 (s, 3H), 1.03 (s, 3H), 0.93 (s, 9H), 0.90 (s, 3H), 0.58 (s, 3H). **<sup>13</sup>C NMR (75 MHz, CDCl<sub>3</sub>)**:  $\delta_{\text{C}}$  177.5, 168.3, 168.1, 144.0, 136.5, 128.6 (x2), 128.2 (x2), 128.1, 122.0, 82.4, 72.1, 66.1, 55.0, 50.7, 50.6, 47.7, 46.8, 46.0, 43.9, 41.9, 41.5, 39.7, 39.5, 38.4, 34.0, 33.2, 32.5, 32.5, 30.9, 29.8, 28.6, 27.6, 26.0, 23.8, 23.6, 23.1, 18.3, 17.8, 16.9, 16.5. **HRMS (ESI<sup>+</sup>)**: Calcd for C<sub>41</sub>H<sub>56</sub>N<sub>6</sub>NaO<sub>6</sub> [M+Na]<sup>+</sup> 751.4159, found 751.4167.

#### General procedure for the synthesis of compound **8**

Sodium azide (0.31 g, 4.81 mmol) was added portion-wise to a solution of compound **6** (2.00 g, 3.20 mmol). The reaction mixture was stirred for 6h at 75 °C then quenched with water and extracted with CH<sub>2</sub>Cl<sub>2</sub>. The organic layers were dried over anhydrous Na<sub>2</sub>SO<sub>4</sub> and concentrated under reduced pressure. The residue was purified by silica gel flash column chromatography

(cyclohexane/AcOEt 9.5/0.5) to afford compound **8** as a white solid (1.41 g, 70%), mp: 138-140 °C. IR ( $\nu_{\max}$  /  $\text{cm}^{-1}$ ): 2943, 2110, 1727, 1299, 689.  $^1\text{H NMR}$  (300 MHz,  $\text{CDCl}_3$ ):  $\delta_{\text{H}}$  7.37 - 7.30 (m, 5H), 5.26 (t,  $J = 3.7$  Hz, 1H), 5.12 - 5.02 (m, 2H), 4.61 (t,  $J = 8.1$  Hz, 1H), 3.85 (s, 2H), 2.90 (dd,  $J = 14.1, 4.5$  Hz, 1H), 2.04 - 1.76 (m, 4H), 1.75 - 1.49 (m, 11H), 1.44 - 1.17 (m, 7H), 1.12 (s, 3H), 0.92 (s, 3H), 0.91 (s, 3H), 0.90 (s, 3H), 0.88 (s, 3H), 0.87 (s, 3H), 0.60 (s, 3H).  $^{13}\text{C NMR}$  (75 MHz,  $\text{CDCl}_3$ ):  $\delta_{\text{C}}$  177.5, 168.2, 143.8, 136.5, 128.5 (x2), 128.1 (x2), 128.0, 122.4, 83.3, 66.0, 55.3, 50.7, 47.6, 46.8, 45.9, 41.8, 41.4, 39.4, 38.1, 37.8, 37.0, 33.9, 33.2, 32.7, 32.4, 30.8, 28.2, 27.7, 25.9, 23.7, 23.6, 23.5, 23.1, 18.3, 16.9, 16.8, 15.4. HRMS (ESI<sup>+</sup>): Calcd for  $\text{C}_{39}\text{H}_{55}\text{N}_3\text{NaO}_4$  [ $\text{M}+\text{Na}$ ]<sup>+</sup> 652.4090, found 652.4068

### III. General procedure for the synthesis of compounds **11a-k**

A mixture of the appropriate aniline **9a-k** (25 mmol) and diethyl ethoxymethylenemalonate (5.55 mL, 27.5 mmol) was stirred and heated at 120 °C for 2 h. After cooling, the reaction mixture was put under reduced pressure to evaporate the ethanol formed during the reaction and to yield compounds **10a-k** which were used in the next step without any further purification. The intermediate malonate esters **10a-k** above were added portion-wise to 50 mL of boiling diphenyl ether. The solution was refluxed at 250 °C between 2 and 6 hours. After cooling to room temperature, cyclohexane (50 mL) was added and the formed solid precipitate was filtrated and washed with cyclohexane (3 x 30 mL). The product was then stirred for 20 min in ethanol (100 mL) and filtered again to ensure that diphenyl ether was fully removed. The desired quinolone derivatives **11a-k** were obtained in good yields ranging from 48 to 92%. It was difficult to characterize the chemical structure of compounds **11a-k** by  $^1\text{H NMR}$  and  $^{13}\text{C NMR}$  spectra due to their poor solubility even in  $\text{DMSO}-d_6$ .

### IV. General procedure for the synthesis of compounds **12a-k**

A mixture of the appropriate quinolone derivative **11a-k** (3 mmol) and DIPEA (4.5 mmol) in anhydrous DMF (10 mL) was stirred at 70 °C for 30 min until all solid was dissolved. Propargyl bromide (4.5 mmol) was then added dropwise and the solution was heated at 70 °C for 12h. Water (10 mL) was then added to the reaction mixture and extracted with  $\text{CH}_2\text{Cl}_2$  (3 x 25 mL). The organic layers were dried over anhydrous  $\text{Na}_2\text{SO}_4$  and concentrated under reduced pressure. The residue was purified by silica gel flash column chromatography using cyclohexane /ethyl acetate (3/7) as eluent to obtain the title compounds **12a-k**.

(**12a**) Yield: 83%, mp: 197-199 °C. IR ( $\nu_{\max}$  /  $\text{cm}^{-1}$ ): 3211, 1717, 1312, 1104, 820.  $^1\text{H NMR}$  (300 MHz,  $\text{CDCl}_3$ ):  $\delta_{\text{H}}$  8.53 (s, 1H), 8.71 (d,  $J = 2.6$  Hz, 1H), 7.64 (dd,  $J = 8.9, 2.6$  Hz, 1H),

7.51 (d,  $J = 9.0$  Hz, 1H), 4.89 (d,  $J = 2.6$  Hz, 2H), 4.38 (q,  $J = 7.1$  Hz, 2H), 2.62 (t,  $J = 2.5$  Hz, 1H), 1.40 (t,  $J = 7.1$  Hz, 3H).  $^{13}\text{C}$  NMR (75 MHz,  $\text{CDCl}_3$ ):  $\delta_{\text{C}}$  173.2, 165.2, 148.6, 137.1, 133.1, 132.0, 130.1, 127.4, 117.7, 111.9, 77.6, 75.0, 61.2, 43.8, 14.5. HRMS (ESI<sup>+</sup>): Calcd for  $\text{C}_{30}\text{H}_{24}\text{Cl}_2\text{N}_2\text{NaO}_6$  [2M+Na]<sup>+</sup> 601.0909, found 601.0947.

(12b) Yield: 88%, mp: 205-207 °C. IR ( $\nu_{\text{max}}$  /  $\text{cm}^{-1}$ ): 3171, 1671, 1318, 1174, 815.  $^1\text{H}$  NMR (300 MHz,  $\text{CDCl}_3$ ):  $\delta_{\text{H}}$  8.57 (s, 1H), 8.17 - 8.11 (m, 1H), 7.61 - 7.57 (m, 1H), 7.48 - 7.42 (m, 1H), 4.91 (s, 2H), 4.39 (q,  $J = 7.3$  Hz, 2H), 2.62 (s, 1H), 1.40 (t,  $J = 7.1$  Hz, 3H).  $^{13}\text{C}$  NMR (75 MHz,  $\text{CDCl}_3$ ):  $\delta_{\text{C}}$  173.6, 165.4, 160.3 (d,  $J = 251.3$  Hz), 148.5, 135.1, 131.0, 121.2 (d,  $J = 24.3$  Hz), 118.3 (d,  $J = 9.0$  Hz), 113.2 (d,  $J = 22.2$  Hz), 110.0, 77.6, 75.0, 61.2, 43.9, 14.6. HRMS (ESI<sup>+</sup>): Calcd for  $\text{C}_{15}\text{H}_{13}\text{FNO}_3$  [M+H]<sup>+</sup> 274.0879, found 274.0895.

(12c) Yield: 82%, mp: 190-192 °C. IR ( $\nu_{\text{max}}$  /  $\text{cm}^{-1}$ ): 3191, 1670, 1312, 1120, 821.  $^1\text{H}$  NMR (300 MHz,  $\text{CDCl}_3$ ):  $\delta_{\text{H}}$  8.72 (d,  $J = 2.1$  Hz, 1H), 8.57 (s, 1H), 7.89 (dd,  $J = 8.9, 2.2$  Hz, 1H), 7.68 (d,  $J = 8.9$  Hz, 1H), 4.95 (d,  $J = 2.5$  Hz, 2H), 4.37 (q,  $J = 7.1$  Hz, 2H), 2.63 (t,  $J = 2.5$  Hz, 1H), 1.39 (t,  $J = 7.1$  Hz, 3H).  $^{13}\text{C}$  NMR (75 MHz,  $\text{CDCl}_3$ ):  $\delta_{\text{C}}$  173.6, 164.8, 149.2, 140.6, 129.1 (q,  $J = 3.3$  Hz), 128.8, 127.6 (q,  $J = 33.6$  Hz), 125.7 (q,  $J = 4.0$  Hz), 123.7 (q,  $J = 272.3$  Hz), 117.1, 112.6, 77.8, 74.8, 61.3, 43.8, 14.5. HRMS (ESI<sup>+</sup>): Calcd for  $\text{C}_{16}\text{H}_{13}\text{F}_3\text{NO}_3$  [M+H]<sup>+</sup> 324.0848, found 324.0864.

(12d) Yield: 80%, mp: 194-196 °C. IR ( $\nu_{\text{max}}$  /  $\text{cm}^{-1}$ ): 3317, 1727, 1312, 1096, 808.  $^1\text{H}$  NMR (300 MHz,  $\text{CDCl}_3$ ):  $\delta_{\text{H}}$  8.71 (d,  $J = 2.1$  Hz, 1H), 8.57 (s, 1H), 7.88 (dd,  $J = 8.8, 2.2$  Hz, 1H), 7.68 (d,  $J = 8.8$  Hz, 1H), 4.96 (d,  $J = 2.5$  Hz, 2H), 4.36 (q,  $J = 7.1$  Hz, 2H), 2.64 (t,  $J = 2.3$  Hz, 1H), 1.38 (t,  $J = 7.1$  Hz, 3H).  $^{13}\text{C}$  NMR (75 MHz,  $\text{CDCl}_3$ ):  $\delta_{\text{C}}$  173.6, 164.7, 149.2, 140.5, 129.1 (q,  $J = 3.3$  Hz), 128.7, 127.6 (q,  $J = 33.7$  Hz), 125.7 (q,  $J = 4.0$  Hz), 123.6 (q,  $J = 270.5$  Hz), 117.1, 112.5, 77.8, 74.8, 61.3, 43.9, 14.5. HRMS (ESI<sup>+</sup>): Calcd for  $\text{C}_{16}\text{H}_{12}\text{F}_3\text{NNaO}_4$  [M+Na]<sup>+</sup> 362.0616, found 362.0487.

(12e) Yield: 78%, mp: 152-154 °C. IR ( $\nu_{\text{max}}$  /  $\text{cm}^{-1}$ ): 3222, 1690, 1311, 1147, 785.  $^1\text{H}$  NMR (300 MHz,  $\text{CDCl}_3$ ):  $\delta_{\text{H}}$  8.55 (s, 1H), 8.34 - 8.31 (m, 1H), 7.47 - 7.34 (m, 2H), 5.09 (t,  $J = 2.7$  Hz, 2H), 4.39 (q,  $J = 7.1$  Hz, 2H), 2.58 (t,  $J = 2.5$  Hz, 1H), 1.41 (t,  $J = 7.1$  Hz, 3H).  $^{13}\text{C}$  NMR (75 MHz,  $\text{CDCl}_3$ ):  $\delta_{\text{C}}$  173.1, 165.3, 152.0 (d,  $J = 250.2$  Hz), 150.4, 131.8, 128.0 (d,  $J = 7.3$  Hz), 125.8 (d,  $J = 8.3$  Hz), 124.0 (d,  $J = 3.5$  Hz), 120.0 (d,  $J = 22.8$  Hz), 111.9, 76.9, 76.2, 61.3, 47.2

(d,  $J = 17.6$  Hz), 14.5. **HRMS (ESI<sup>+</sup>)**: Calcd for C<sub>15</sub>H<sub>13</sub>FNO<sub>3</sub> [M+H]<sup>+</sup> 274.0879, found 274.0885.

**(12f)** Yield: 73%, mp: 52-54 °C. **IR (v<sub>max</sub> / cm<sup>-1</sup>)**: 3262, 1713, 1305, 1125, 778. **<sup>1</sup>H NMR (300 MHz, CDCl<sub>3</sub>)**: δ<sub>H</sub> 9.36 (s, 1H), 8.54 (d,  $J = 8.4$  Hz, 1H), 8.09 (d,  $J = 7.2$  Hz, 1H), 7.59 (t,  $J = 7.9$  Hz, 1H), 5.02 (d,  $J = 2.4$  Hz, 2H), 4.33 (q,  $J = 7.1$  Hz, 2H), 2.54 (t,  $J = 2.4$  Hz, 1H), 1.40 (t,  $J = 7.1$  Hz, 3H). **<sup>13</sup>C NMR (75 MHz, CDCl<sub>3</sub>)**: δ<sub>C</sub> 164.2, 162.7, 153.0, 147.4, 130.1 (q,  $J = 5.5$  Hz), 128.6, 127.6 (q,  $J = 29.2$  Hz), 125.7, 124.9, 123.8 (q,  $J = 274.1$  Hz), 115.2, 77.9, 77.4, 63.3, 61.9, 14.2. **HRMS (ESI<sup>+</sup>)**: Calcd for C<sub>16</sub>H<sub>13</sub>F<sub>3</sub>NO<sub>3</sub> [M+H]<sup>+</sup> 324.0848, found 324.0867.

**(12g)** Yield: 49%, mp: 159-161 °C. **IR (v<sub>max</sub> / cm<sup>-1</sup>)**: 3262, 1679, 1326, 1169, 786. **<sup>1</sup>H NMR (300 MHz, CDCl<sub>3</sub>)**: δ<sub>H</sub> 8.57 (s, 1H), 8.46 (dd,  $J = 8.0, 1.6$  Hz, 1H), 7.62 - 7.58 (m, 1H), 7.42 (t,  $J = 8.0$  Hz, 1H), 5.11 (d,  $J = 2.5$  Hz, 2H), 4.38 (q,  $J = 7.1$  Hz, 2H), 2.56 (t,  $J = 2.5$  Hz, 1H), 1.39 (t,  $J = 7.1$  Hz, 3H). **<sup>13</sup>C NMR (75 MHz, CDCl<sub>3</sub>)**: δ<sub>C</sub> 173.0, 164.9, 151.4, 138.2 (q,  $J = 1.6$  Hz), 132.0, 131.8, 126.8, 125.5, 125.0 (q,  $J = 1.7$  Hz), 120.6 (q,  $J = 260.6$  Hz), 112.3, 76.9, 75.9, 61.3, 47.5, 14.5. **HRMS (ESI<sup>+</sup>)**: Calcd for C<sub>16</sub>H<sub>12</sub>F<sub>3</sub>NNaO<sub>4</sub> [M+Na]<sup>+</sup> 362.0616, found 362.0631.

**(12h)** Yield: 66%, mp: 174-176 °C. **IR (v<sub>max</sub> / cm<sup>-1</sup>)**: 3317, 1693, 1315, 1115, 799. **<sup>1</sup>H NMR (300 MHz, CDCl<sub>3</sub>)**: δ<sub>H</sub> 8.65 (s, 1H), 8.63 (d,  $J = 9.5$  Hz, 1H), 7.84 (s, 1H), 7.68 (d,  $J = 8.3$  Hz, 1H), 4.96 (d,  $J = 2.5$  Hz, 2H), 4.40 (q,  $J = 7.1$  Hz, 2H), 2.66 (t,  $J = 2.5$  Hz, 1H), 1.41 (t,  $J = 7.1$  Hz, 3H). **<sup>13</sup>C NMR (75 MHz, CDCl<sub>3</sub>)**: δ<sub>C</sub> 173.5, 165.1, 149.3, 138.5, 134.5 (q,  $J = 31.7$  Hz), 129.5, 129.4 (q,  $J = 245.5$  Hz), 125.3, 121.8 (q,  $J = 3.4$  Hz), 113.7 (q,  $J = 4.2$  Hz), 112.6, 78.1, 74.6, 61.4, 43.8, 14.5. **HRMS (ESI<sup>+</sup>)**: Calcd for C<sub>16</sub>H<sub>13</sub>F<sub>3</sub>NO<sub>3</sub> [M+H]<sup>+</sup> 324.0848, found 324.0858.

**(12i)** Yield: 52%, mp: 166-168 °C. **IR (v<sub>max</sub> / cm<sup>-1</sup>)**: 3243, 1680, 1316, 1160, 804. **<sup>1</sup>H NMR (300 MHz, CDCl<sub>3</sub>)**: δ<sub>H</sub> d 8.49 (s, 1H), 8.33 (dd,  $J = 2.3, 1.2$  Hz, 1H), 7.51 (dd,  $J = 13.3, 2.4$  Hz, 1H), 5.06 (d,  $J = 2.7$  Hz, 2H), 4.33 (q,  $J = 7.1$  Hz, 2H), 2.60 (t,  $J = 2.5$  Hz, 1H), 1.36 (t,  $J = 7.1$  Hz, 3H). **<sup>13</sup>C NMR (75 MHz, CDCl<sub>3</sub>)**: δ<sub>C</sub> 171.6, 164.5, 151.6 (d,  $J = 257.1$  Hz), 150.3, 132.2, 127.0 (d,  $J = 7.2$  Hz), 126.5 (d,  $J = 3.6$  Hz), 123.2 (d,  $J = 26.0$  Hz), 118.5 (d,  $J = 9.5$  Hz), 111.8, 77.1, 75.9, 61.2, 47.2 (d,  $J = 17.1$  Hz), 14.4. **HRMS (ESI<sup>+</sup>)**: Calcd for C<sub>30</sub>H<sub>22</sub>Br<sub>2</sub>F<sub>2</sub>N<sub>2</sub>NaO<sub>6</sub> [2M+Na]<sup>+</sup> 724.9710, found 724.9737.

**(12j)** Yield: 48%, mp: 155-157 °C. **IR** ( $\nu_{\max}$  /  $\text{cm}^{-1}$ ): 3195, 1687, 1310, 1173, 803.  **$^1\text{H}$  NMR (300 MHz,  $\text{CDCl}_3$ )**:  $\delta_{\text{H}}$  d 8.57 – 8.56 (m, 1H), 8.50 (s, 1H), 7.69 (dd,  $J = 13.2, 2.1$  Hz, 1H), 5.06 (d,  $J = 2.7$  Hz, 2H), 4.36 (q,  $J = 7.1$  Hz, 2H), 2.60 (t,  $J = 2.4$  Hz, 1H), 1.38 (t,  $J = 7.1$  Hz, 3H).  **$^{13}\text{C}$  NMR (75 MHz,  $\text{CDCl}_3$ )**:  $\delta_{\text{C}}$  171.4, 164.5, 151.2 (d,  $J = 253.7$  Hz), 150.3, 132.9 (d,  $J = 3.2$  Hz), 132.3 (d,  $J = 2.4$  Hz), 128.5 (d,  $J = 25.3$  Hz), 127.7 (d,  $J = 7.2$  Hz), 112.1 (d,  $J = 3.2$  Hz), 88.3 (d,  $J = 8.2$  Hz), 77.1, 75.9, 61.2, 47.2 (d,  $J = 17.1$  Hz), 14.4. **HRMS (ESI<sup>+</sup>)**: Calcd for  $\text{C}_{15}\text{H}_{12}\text{FINO}_3$   $[\text{M}+\text{H}]^+$  399.9846, found 399.9876.

**(12k)** Yield: 81%, mp: 175-177 °C. **IR** ( $\nu_{\max}$  /  $\text{cm}^{-1}$ ): 3221, 1681, 1322, 1065, 808.  **$^1\text{H}$  NMR (300 MHz,  $\text{CDCl}_3$ )**:  $\delta_{\text{H}}$  8.54 (s, 1H), 8.19 – 8.13 (m, 1H), 5.07 (t,  $J = 3.0$  Hz, 2H), 4.40 (q,  $J = 7.1$  Hz, 2H), 2.63 (t,  $J = 2.5$  Hz, 1H), 1.41 (t,  $J = 7.1$  Hz, 3H).  **$^{13}\text{C}$  NMR (75 MHz,  $\text{CDCl}_3$ )**:  $\delta_{\text{C}}$  171.5, 164.8, 150.8, 148.8 (ddd,  $J = 253.5, 11.0, 2.2$  Hz), 143.7 (td,  $J = 257.8, 15.8$  Hz), 141.7 (ddd,  $J = 255.8, 14.3, 2.4$  Hz), 125.8, 125.6, 110.1 (dd,  $J = 18.8, 3.1$  Hz), 77.5, 75.4 (d,  $J = 2.6$  Hz), 61.5, 47.0 (d,  $J = 16.3$  Hz), 14.5. **HRMS (ESI<sup>+</sup>)**: Calcd for  $\text{C}_{15}\text{H}_{11}\text{F}_3\text{NO}_3$   $[\text{M}+\text{H}]^+$  310.0691, found 310.0695.

#### IV. General procedure for the synthesis of compounds 13a-k

To a mixture of propargylated quinolone **12a-k** (0.30 mmol) and azide (0.11 g, 0.15 mmol) in  $\text{CH}_2\text{Cl}_2$  (1 mL) and  $\text{H}_2\text{O}$  (1 mL) were added  $\text{CuSO}_4 \cdot 5\text{H}_2\text{O}$  (15.09 mg, 0.06 mmol) and sodium ascorbate (23.92 mg, 0.12 mmol). The reaction mixture was stirred at room temperature for 8-10 h then diluted with water and extracted with  $\text{CH}_2\text{Cl}_2$ . The organic layers were washed with brine, dried over anhydrous  $\text{Na}_2\text{SO}_4$  and concentrated under reduced pressure. The residue was purified using silica gel flash column chromatography.

**(13a)** White solid, yield: 92%, mp > 290 °C.  $[\alpha]_D^{24} +47$  ( $c$  0.05,  $\text{CHCl}_3$ ). **IR** ( $\nu_{\max}$  /  $\text{cm}^{-1}$ ): 2932, 1720, 1619, 1486, 1227, 1161, 1108, 815, 749, 697.  **$^1\text{H}$  NMR (300 MHz,  $\text{CDCl}_3$ )**:  $\delta_{\text{H}}$  8.69 (s, 1H), 8.67 (s, 1H), 8.25 (s, 1H), 8.22 (s, 1H), 8.14 - 7.86 (m, 2H), 7.67 - 7.46 (m, 4H), 7.37 - 7.29 (m, 5H), 5.58 - 5.41 (m, 4H), 5.23 (t,  $J = 3.5$  Hz, 1H), 5.19 - 5.00 (m, 6H), 4.95 - 4.85 (m, 1H), 4.49 (d,  $J = 10.1$  Hz, 1H), 4.29 (q,  $J = 6.7$  Hz, 4H), 2.88 (dd,  $J = 12.7, 3.9$  Hz, 1H), 2.01 - 1.87 (m, 3H), 1.77 - 1.47 (m, 9H), 1.41 - 1.28 (m, 9H), 1.24 - 1.14 (m, 5H), 1.09 (s, 3H), 0.90 (s, 3H), 0.89 (s, 3H), 0.87 (s, 3H), 0.79 (s, 3H), 0.57 (s, 3H), 0.53 (s, 3H).  **$^{13}\text{C}$  NMR (75 MHz,  $\text{CDCl}_3$ )**:  $\delta_{\text{C}}$  177.5, 173.6, 173.6, 165.8, 165.5, 165.3, 165.3, 149.5, 149.5, 144.0, 142.3, 142.2, 137.4, 137.4, 136.5, 133.2, 133.1, 131.9, 131.9, 131.7, 131.7, 128.5 (x2), 128.1 (x2), 128.1, 127.0, 127.0, 125.3, 125.3, 121.8, 118.7, 118.7, 111.6, 111.5, 82.8, 72.2, 66.1, 61.2, 61.2, 54.7,



51.1, 51.0, 49.9, 49.8, 47.5, 46.8, 45.9, 41.8, 41.4, 39.6, 39.4, 38.3, 34.0, 33.2, 32.5, 32.4, 30.8, 29.8, 28.4, 27.6, 26.0, 23.8, 23.5, 23.1, 18.2, 17.4, 16.9, 16.5, 14.5, 14.5. **HRMS (ESI<sup>+</sup>)**: Calcd for C<sub>71</sub>H<sub>81</sub>Cl<sub>2</sub>N<sub>8</sub>O<sub>12</sub> [M+H]<sup>+</sup> 1307.5351, found 1307.5358.

**(13b)** White solid, yield: 94%, mp: 263-265 °C.  $[\alpha]_D^{24} +51$  (*c* 0.05, CHCl<sub>3</sub>). **IR** ( $\nu_{\max}$  / cm<sup>-1</sup>): 2943, 1720, 1616, 1492, 1261, 1211, 1152, 818, 716, 696. **<sup>1</sup>H NMR (300 MHz, CDCl<sub>3</sub>)**:  $\delta_{\text{H}}$  8.74 (s, 1H), 8.71 (s, 1H), 8.05 - 7.96 (m, 3H), 7.84 (s, 1H), 7.68 - 7.60 (m, 2H), 7.40 - 7.29 (m, 7H), 5.53 (s, 1H), 5.51 (s, 1H), 5.25 - 4.99 (m, 7H), 4.90 (td, *J* = 10.2, 4.4 Hz, 1H), 4.44 (d, *J* = 10.2 Hz, 1H), 4.30 (q, *J* = 7.0 Hz, 4H), 2.88 (dd, *J* = 13.5, 3.5 Hz, 1H), 2.01 - 1.85 (m, 3H), 1.82 - 1.73 (m, 2H), 1.71 - 1.40 (m, 7H), 1.35 (t, *J* = 7.0 Hz, 6H), 1.29 - 1.13 (m, 6H), 1.09 (s, 3H), 0.91 (s, 3H), 0.89 (s, 3H), 0.87 (s, 3H), 0.78 (s, 3H), 0.57 (s, 3H), 0.53 (s, 3H). **<sup>13</sup>C NMR (75 MHz, CDCl<sub>3</sub>)**:  $\delta_{\text{C}}$  177.5, 173.8, 173.7, 165.7, 165.6, 165.5, 165.4, 160.2 (d, *J* = 248.5 Hz), 160.1 (d, *J* = 248.7 Hz), 149.3, 149.3, 144.1, 142.4, 142.3, 136.5, 135.4 (d, *J* = 5.2 Hz), 135.4 (d, *J* = 5.1 Hz), 131.1 (d, *J* = 7.0 Hz), 131.0 (d, *J* = 7.3 Hz), 128.6 (x2), 128.2 (x2), 128.1, 125.1, 125.0, 121.8, 121.3 (d, *J* = 25.2 Hz), 121.2 (d, *J* = 24.6 Hz), 119.2 (d, *J* = 6.9 Hz), 119.1 (d, *J* = 7.4 Hz), 112.8 (d, *J* = 23.5 Hz), 112.8 (d, *J* = 23.3 Hz), 110.8, 110.8, 82.8, 72.2, 66.1, 61.2, 61.2, 54.7, 51.1, 51.0, 50.0, 49.9, 47.6, 46.8, 45.9, 43.7, 41.8, 41.4, 39.5, 39.4, 38.3, 34.0, 33.2, 32.4, 30.8, 29.8, 28.4, 27.6, 25.9, 23.8, 23.5, 23.1, 18.2, 17.4, 16.9, 16.4, 14.5, 14.5. **<sup>19</sup>F NMR (282 MHz, CDCl<sub>3</sub>)**:  $\delta_{\text{F}}$  -114.5, -114.6. **HRMS (ESI<sup>+</sup>)**: Calcd for C<sub>71</sub>H<sub>81</sub>F<sub>2</sub>N<sub>8</sub>O<sub>12</sub> [M+H]<sup>+</sup> 1275.4942, found 1275.4995.

**(13c)** White solid, yield: 93%, mp: 174-176 °C.  $[\alpha]_D^{24} +40$  (*c* 0.05, CHCl<sub>3</sub>). **IR** ( $\nu_{\max}$  / cm<sup>-1</sup>): 2939, 1723, 1611, 1501, 1231, 1157, 1124, 806, 731, 698. **<sup>1</sup>H NMR (300 MHz, CDCl<sub>3</sub>)**:  $\delta_{\text{H}}$  8.75 (s, 2H), 8.69 - 8.60 (m, 2H), 7.99 (s, 1H), 7.90 (s, 1H), 7.87 - 7.74 (m, 4H), 7.37 - 7.29 (m, 5H), 5.55 (s, 4H), 5.24 - 4.86 (m, 8H), 4.53 (d, *J* = 10.1 Hz, 1H), 4.29 (q, *J* = 7.1 Hz, 4H), 2.88 (dd, *J* = 14.0, 4.3 Hz, 1H), 2.03 - 1.96 (m, 1H), 1.90 - 1.74 (m, 3H), 1.67 - 1.46 (m, 8H), 1.38 - 1.31 (m, 7H), 1.27 - 1.21 (m, 7H), 1.07 (s, 3H), 0.90 (s, 3H), 0.89 (s, 3H), 0.84 (s, 3H), 0.78 (s, 3H), 0.57 (s, 3H), 0.52 (s, 3H). **<sup>13</sup>C NMR (75 MHz, CDCl<sub>3</sub>)**:  $\delta_{\text{C}}$  177.4, 174.0, 173.9, 165.8, 165.5, 165.0, 165.0, 150.2, 150.2, 144.0, 142.0, 141.9, 141.0, 140.9, 136.4, 129.2, 129.2, 128.8, 128.7, 128.5 (x2), 128.1 (x2), 128.1, 127.4 (q, *J* = 33.8 Hz), 127.4 (q, *J* = 33.6 Hz), 125.4, 125.4, 125.3, 125.2, 123.5 (q, *J* = 271.2 Hz), 123.4 (q, *J* = 271.4 Hz), 121.7, 118.0, 117.9, 112.3, 112.3, 82.9, 72.2, 66.1, 61.3, 61.3, 54.6, 51.0, 50.9, 49.7, 47.5, 46.8, 45.9, 43.6, 43.6, 41.8, 41.4, 39.6, 39.3, 38.2, 37.8, 33.9, 33.2, 32.4, 30.8, 29.8, 28.4, 27.6, 25.9, 23.7, 23.5, 22.8,

18.2, 17.4, 16.8, 16.4, 14.4, 14.4. **<sup>19</sup>F NMR (282 MHz, CDCl<sub>3</sub>):** δ<sub>F</sub> -62.2, -62.2. **HRMS (ESI<sup>+</sup>):** Calcd for C<sub>73</sub>H<sub>80</sub>F<sub>6</sub>N<sub>8</sub>NaO<sub>12</sub> [M+Na]<sup>+</sup> 1397.5698, found 1397.5706.

**(13d)** White solid, yield: 91%, mp > 290 °C. [α]<sub>D</sub><sup>24</sup> +57 (c 0.05, CHCl<sub>3</sub>). **IR (ν<sub>max</sub> / cm<sup>-1</sup>):** 2937, 1725, 1610, 1502, 1231, 1156, 1124, 820, 730, 698. **<sup>1</sup>H NMR (300 MHz, CDCl<sub>3</sub>):** δ<sub>H</sub> 8.75 (s, 2H), 8.64 - 8.59 (m, 2H), 8.03 (s, 1H), 7.94 (s, 1H), 7.83 - 7.73 (m, 4H), 7.37 - 7.29 (m, 5H), 5.56 (s, 4H), 5.22 (t, *J* = 3.9 Hz, 1H), 5.16 - 4.87 (m, 7H), 4.54 (d, *J* = 10.1 Hz, 1H), 4.27 (q, *J* = 7.1 Hz, 4H), 2.88 (dd, *J* = 13.4, 4.5 Hz, 1H), 1.99 - 1.85 (m, 2H), 1.80 - 1.41 (m, 10H), 1.35 - 1.14 (m, 14H), 1.06 (s, 3H), 0.90 (s, 3H), 0.89 (s, 3H), 0.84 (s, 3H), 0.79 (s, 3H), 0.58 (s, 3H), 0.52 (s, 3H). **<sup>13</sup>C NMR (75 MHz, CDCl<sub>3</sub>):** δ<sub>C</sub> 177.4, 173.8, 173.7, 165.8, 165.5, 164.9, 164.9, 150.1, 150.1, 144.1, 144.1, 142.0, 142.0, 141.0, 141.0, 136.5, 129.2, 129.1, 128.9, 128.9, 128.5 (x2), 128.2 (x2), 128.1, 127.4 (x2) (q, *J* = 33.8 Hz), 125.5, 125.5, 125.1, 125.0, 123.7 (x2) (q, *J* = 271.9 Hz), 121.8, 117.9, 117.8, 112.5, 112.5, 83.0, 72.2, 66.1, 61.2, 61.2, 54.7, 51.1, 51.0, 49.8, 49.7, 47.6, 46.8, 46.0, 43.7, 41.8, 41.5, 39.6, 39.4, 38.3, 34.0, 33.2, 32.4, 30.8, 29.8, 28.4, 27.7, 25.9, 23.7, 23.5, 23.1, 18.2, 17.4, 16.9, 16.4, 14.4, 14.4. **<sup>19</sup>F NMR (282 MHz, CDCl<sub>3</sub>):** δ<sub>F</sub> -62.2, -62.2. **HRMS (ESI<sup>+</sup>):** Calcd for C<sub>73</sub>H<sub>80</sub>F<sub>6</sub>N<sub>8</sub>NaO<sub>14</sub> [M+Na]<sup>+</sup> 1429.5596, found 1429.5623.

**(13e)** White solid, yield: 88%, mp: 278-280 °C. [α]<sub>D</sub><sup>24</sup> +38 (c 0.05, CHCl<sub>3</sub>). **IR (ν<sub>max</sub> / cm<sup>-1</sup>):** 2962, 1692, 1623, 1492, 1205, 1164, 1111, 801, 739, 703. **<sup>1</sup>H NMR (300 MHz, CDCl<sub>3</sub>):** δ<sub>H</sub> 8.80 (s, 1H), 8.78 (s, 1H), 8.32 - 8.23 (m, 2H), 7.99 (s, 1H), 7.86 (s, 1H), 7.41 - 7.28 (m, 9H), 5.74 - 5.57 (m, 4H), 5.25 (t, *J* = 3.2 Hz, 1H), 5.20 - 4.98 (m, 6H), 4.92 - 4.48 (m, 1H), 4.43 - 4.30 (m, 5H), 2.89 (dd, *J* = 10.3, 2.9 Hz, 1H), 2.00 - 1.88 (m, 2H), 1.79 - 1.52 (m, 8H), 1.41 - 1.33 (m, 8H), 1.28 - 1.14 (m, 8H), 1.10 (s, 3H), 0.91 (s, 3H), 0.89 (s, 3H), 0.86 (s, 3H), 0.75 (s, 3H), 0.55 (s, 3H), 054 (s, 3H). **<sup>13</sup>C NMR (75 MHz, CDCl<sub>3</sub>):** δ<sub>C</sub> 177.4, 173.3, 173.3, 165.6, 165.4, 165.4, 165.3, 151.9 (d, *J* = 249.3 Hz), 151.9 (d, *J* = 248.9 Hz), 151.7, 151.7, 144.1, 143.0, 143.0, 136.5, 132.0, 131.8, 128.6 (x2), 128.5 (d, *J* = 20.2 Hz), 128.4 (d, *J* = 22.9 Hz), 128.1 (x2), 128.1, 125.5 (d, *J* = 8.0 Hz), 125.4 (d, *J* = 7.5 Hz), 124.8, 124.6, 124.1 (d, *J* = 5.3 Hz), 124.0 (d, *J* = 4.5 Hz), 121.9, 120.0 (d, *J* = 23.1 Hz), 119.8 (d, *J* = 23.3 Hz), 111.8, 111.8, 82.5, 72.2, 66.1, 61.2, 61.2, 54.8, 52.8 (d, *J* = 15.4 Hz), 52.7 (d, *J* = 15.5 Hz), 51.1, 51.0, 47.6, 46.8, 46.0, 43.6, 41.9, 41.5, 39.5, 39.5, 38.3, 34.0, 33.2, 32.5, 30.8, 29.8, 28.4, 27.7, 26.0, 23.8, 23.6, 23.1, 18.2, 17.3, 16.9, 16.5, 14.5, 14.5. **<sup>19</sup>F NMR (282 MHz, CDCl<sub>3</sub>):** δ<sub>F</sub> -121.5. **HRMS (ESI<sup>+</sup>):** Calcd for C<sub>71</sub>H<sub>81</sub>F<sub>2</sub>N<sub>8</sub>O<sub>12</sub> [M+H]<sup>+</sup> 1275.5942, found 1275.6002.

**(13f)** White solid, yield: 86%, mp: 192-194 °C.  $[\alpha]_D^{24} +25$  (*c* 0.05, CHCl<sub>3</sub>). IR ( $\nu_{\max}$  / cm<sup>-1</sup>): 2963, 1736, 1620, 1494, 1218, 1147, 1111, 803, 722, 702. <sup>1</sup>H NMR (300 MHz, CDCl<sub>3</sub>):  $\delta_{\text{H}}$  9.38 (s, 2H), 8.47 - 8.43 (m, 2H), 8.14 - 8.03 (m, 4H), 7.57 - 7.51 (m, 2H), 7.37 - 7.29 (m, 5H), 5.51 - 5.42 (m, 4H), 5.27 (t, *J* = 3.6 Hz, 1H), 5.21 - 5.01 (m, 7H), 4.76 (d, *J* = 10.2 Hz, 1H), 4.51 - 4.41 (m, 4H), 2.90 (dd, *J* = 13.0, 3.6 Hz, 1H), 2.06 - 1.97 (m, 2H), 1.89 - 1.80 (m, 2H), 1.72 - 1.53 (m, 9H), 1.47 - 1.37 (m, 8H), 1.29 - 1.14 (m, 5H), 1.10 (s, 3H), 0.99 (s, 3H), 0.92 (s, 3H), 0.89 (s, 6H), 0.82 (s, 3H), 0.57 (s, 3H). <sup>13</sup>C NMR (75 MHz, CDCl<sub>3</sub>):  $\delta_{\text{C}}$  177.5, 166.1, 165.8, 164.4, 164.4, 163.6, 163.5, 153.1 (x2), 147.6, 147.6, 144.1, 143.5, 143.5, 136.5, 130.2 (x2) (q, *J* = 5.4 Hz), 128.5 (x2), 128.5, 128.4, 128.1 (x2), 128.1, 127.6, 127.6, 126.2, 126.2, 125.9, 125.9, 124.7, 124.7, 123.9 (x2) (q, *J* = 274.5 Hz), 121.8, 115.2, 115.1, 84.3, 72.5, 69.1, 69.1, 66.1, 62.0, 62.0, 54.9, 51.2, 51.1, 47.6, 46.8, 46.0, 43.7, 41.8, 41.4, 39.7, 39.4, 38.4, 33.9, 33.2, 32.4, 30.8, 29.8, 28.6, 27.7, 26.0, 23.8, 23.6, 23.1, 18.3, 17.6, 16.9, 16.5, 14.4, 14.4. <sup>19</sup>F NMR (282 MHz, CDCl<sub>3</sub>):  $\delta_{\text{F}}$  -60.2. HRMS (ESI<sup>+</sup>): Calcd for C<sub>73</sub>H<sub>80</sub>F<sub>6</sub>KN<sub>8</sub>O<sub>12</sub> [M+K]<sup>+</sup> 1413.5437, found 1413.5458.

**(13g)** White solid, yield: 84%, mp: 167-169 °C.  $[\alpha]_D^{24} +44$  (*c* 0.05, CHCl<sub>3</sub>). IR ( $\nu_{\max}$  / cm<sup>-1</sup>): 2936, 1716, 1620, 1491, 1211, 1164, 1110, 803, 738, 701. <sup>1</sup>H NMR (300 MHz, CDCl<sub>3</sub>):  $\delta_{\text{H}}$  8.77 (s, 1H), 8.76 (s, 1H), 8.49 - 8.44 (m, 2H), 7.82 (s, 1H), 7.69 (s, 1H), 7.55 - 7.51 (m, 2H), 7.41 - 7.28 (m, 7H), 5.78 - 5.64 (m, 4H), 5.25 (t, *J* = 3.5 Hz, 1H), 5.14 - 4.85 (m, 7H), 4.46 (d, *J* = 10.2 Hz, 1H), 4.40 - 4.32 (m, 4H), 2.89 (dd, *J* = 10.7, 3.7 Hz, 1H), 2.00 - 1.87 (m, 2H), 1.79 - 1.49 (m, 10H), 1.43 - 1.33 (m, 8H), 1.29 - 1.15 (m, 5H), 1.10 (s, 3H), 1.04 - 0.99 (m, 1H), 0.91 (s, 3H), 0.89 (s, 3H), 0.89 (s, 3H), 0.77 (s, 3H), 0.57 (s, 3H), 0.55 (s, 3H). <sup>13</sup>C NMR (75 MHz, CDCl<sub>3</sub>):  $\delta_{\text{C}}$  177.4, 173.1, 173.1, 165.6, 165.4, 165.2, 165.1, 152.8, 152.8, 144.1, 142.8, 142.7, 138.0, 137.9, 136.5, 132.4, 132.3, 132.2, 132.0, 128.6 (x2), 128.1 (x2), 128.1, 127.2, 127.2, 125.7, 125.6, 125.3, 125.3, 124.5, 124.3, 121.8, 120.6 (x2) (q, *J* = 260.7 Hz), 112.5, 112.4, 82.6, 72.1, 66.1, 61.3, 61.2, 54.7, 52.9, 52.8, 51.0, 50.9, 47.6, 46.8, 45.9, 43.6, 41.8, 41.4, 39.5, 39.4, 38.3, 33.9, 33.2, 32.4, 30.8, 28.3, 27.6, 26.0, 23.8, 23.5, 23.5, 23.1, 18.2, 17.3, 16.9, 16.5, 14.5, 14.5. <sup>19</sup>F NMR (282 MHz, CDCl<sub>3</sub>):  $\delta_{\text{F}}$  -56.7, -56.7. HRMS (ESI<sup>+</sup>): Calcd for C<sub>73</sub>H<sub>80</sub>F<sub>6</sub>N<sub>8</sub>NaO<sub>14</sub> [M+Na]<sup>+</sup> 1429.5596, found 1429.5596.

**(13h)** White solid, yield: 91%, mp: 256-258 °C.  $[\alpha]_D^{24} +36$  (*c* 0.05, CHCl<sub>3</sub>). IR ( $\nu_{\max}$  / cm<sup>-1</sup>): 2937, 1725, 1619, 1490, 1218, 1169, 1132, 802, 741, 699. <sup>1</sup>H NMR (300 MHz, CDCl<sub>3</sub>):  $\delta_{\text{H}}$  8.84 - 8.69 (m, 2H), 8.58 - 8.41 (m, 2H), 8.13 - 7.80 (m, 4H), 7.59 - 7.50 (m, 2H), 7.36 - 7.29 (m, 5H), 5.77 - 5.43 (m, 4H), 5.24 (t, *J* = 4.2 Hz, 1H), 5.16 - 4.89 (m, 7H), 4.49 (d, *J* = 9.8 Hz,

1H), 4.41 - 4.22 (m, 4H), 2.89 (dd,  $J = 14.1, 4.4$  Hz, 1H), 2.00 - 1.88 (m, 2H), 1.82 - 1.52 (m, 10H), 1.43 - 1.33 (m, 8H), 1.28 - 1.14 (m, 6H), 1.09 (s, 3H), 0.91 (s, 3H), 0.89 (s, 3H), 0.87 (s, 3H), 0.78 (s, 3H), 0.65 (s, 3H), 0.54 (s, 3H).  $^{13}\text{C}$  NMR (75 MHz,  $\text{CDCl}_3$ ):  $\delta_{\text{C}}$  177.5, 173.9, 173.8, 165.7, 165.4, 165.3, 165.2, 150.3, 150.3, 144.1, 141.7, 141.7, 139.0, 138.9, 136.5, 134.3 (q,  $J = 33.0$  Hz), 134.3 (q,  $J = 32.9$  Hz), 129.5 (x2) (q,  $J = 242.3$  Hz), 129.1, 129.1, 128.5 (x2), 128.1 (x2), 128.1, 125.3, 125.2, 121.8, 121.6, 121.6, 121.4, 121.4, 114.4, 114.3, 112.3, 112.2, 82.8, 72.3, 66.1, 61.3, 61.3, 54.6, 51.2, 51.0, 49.3, 49.3, 47.5, 46.8, 45.9, 43.5, 41.8, 41.4, 39.5, 39.4, 38.2, 34.0, 33.2, 32.4, 30.8, 29.8, 28.4, 27.6, 25.9, 23.7, 23.5, 23.1, 18.2, 17.4, 16.9, 16.4, 14.5, 14.5.  $^{19}\text{F}$  NMR (282 MHz,  $\text{CDCl}_3$ ):  $\delta_{\text{F}}$  -62.5, -62.7. HRMS (ESI<sup>+</sup>): Calcd for  $\text{C}_{73}\text{H}_{80}\text{F}_6\text{N}_8\text{NaO}_{12}$  [M+Na]<sup>+</sup> 1397.5698, found 1397.5684.

(13i) White solid, yield: 87%, mp: 202-204 °C.  $[\alpha]_{\text{D}}^{24} +54$  ( $c$  0.05,  $\text{CHCl}_3$ ). IR ( $\nu_{\text{max}}$  /  $\text{cm}^{-1}$ ): 2936, 1711, 1622, 1485, 1259, 1231, 1152, 804, 733, 698.  $^1\text{H}$  NMR (300 MHz,  $\text{CDCl}_3$ ):  $\delta_{\text{H}}$  8.76 (s, 1H), 8.74 (s, 1H), 8.33 - 8.25 (m, 2H), 8.13 (s, 1H), 8.06 (s, 1H), 7.51 - 7.44 (m, 2H), 7.36 - 7.28 (m, 5H), 5.62 (s, 4H), 5.29 - 5.00 (m, 7H), 4.93 - 4.85 (m, 1H), 4.54 (d,  $J = 10.2$  Hz, 1H), 4.32 (q,  $J = 7.1$  Hz, 4H), 2.88 (dd,  $J = 13.7, 4.5$  Hz, 1H), 2.03 - 1.91 (m, 2H), 1.81 - 1.76 (m, 2H), 1.71 - 1.52 (m, 7H), 1.37 - 1.32 (m, 6H), 1.27 - 1.15 (m, 9H), 1.09 (s, 3H), 0.90 (s, 3H), 0.88 (s, 6H), 0.78 (s, 3H), 0.58 (s, 3H), 0.53 (s, 3H).  $^{13}\text{C}$  NMR (75 MHz,  $\text{CDCl}_3$ ):  $\delta_{\text{C}}$  177.4, 172.0, 172.0, 165.7, 165.5, 164.8, 164.8, 151.8, 151.8, 151.7 (d,  $J = 254.7$  Hz), 151.6 (d,  $J = 254.6$  Hz), 144.0, 142.4, 142.3, 136.4, 132.4, 132.3, 128.5 (x2), 128.1 (x2), 128.1, 127.5 (d,  $J = 12.8$  Hz), 127.4 (d,  $J = 12.7$  Hz), 126.6, 126.6, 125.0 (d,  $J = 3.1$  Hz), 124.9 (d,  $J = 3.0$  Hz), 123.3 (d,  $J = 26.5$  Hz), 123.2 (d,  $J = 26.3$  Hz), 121.8, 118.3 (d,  $J = 9.8$  Hz), 118.2 (d,  $J = 9.8$  Hz), 111.6, 111.6, 82.5, 72.1, 66.1, 61.3, 61.3, 54.7, 52.9, 52.7, 51.1, 51.0, 47.5, 46.7, 46.4, 45.9, 43.6, 41.8, 41.4, 39.5, 39.4, 38.3, 33.9, 33.2, 32.4, 30.8, 29.8, 28.3, 27.6, 26.0, 23.8, 23.5, 23.1, 18.2, 17.3, 16.9, 16.6, 14.5, 14.5.  $^{19}\text{F}$  NMR (282 MHz,  $\text{CDCl}_3$ ):  $\delta_{\text{F}}$  -114.5. HRMS (ESI<sup>+</sup>): Calcd for  $\text{C}_{71}\text{H}_{79}\text{Br}_2\text{F}_2\text{N}_8\text{O}_{12}$  [M+H]<sup>+</sup> 1431.4152, found 1431.5258.

(13j) White solid, yield: 86%, mp: 243-245 °C.  $[\alpha]_{\text{D}}^{24} +63$  ( $c$  0.05,  $\text{CHCl}_3$ ). IR ( $\nu_{\text{max}}$  /  $\text{cm}^{-1}$ ): 2930, 1728, 1607, 1472, 1231, 1151, 1124, 803, 731, 698.  $^1\text{H}$  NMR (300 MHz,  $\text{CDCl}_3$ ):  $\delta_{\text{H}}$  8.79 (s, 1H), 8.77 (s, 1H), 8.65 - 8.51 (m, 2H), 7.86 (s, 1H), 7.83 (s, 1H), 7.66 - 7.59 (m, 2H), 7.38 - 7.30 (m, 5H), 5.73 - 5.56 (m, 4H), 5.26 (t,  $J = 3.7$  Hz, 1H), 5.19 - 4.94 (m, 6H), 4.88 - 4.78 (m, 1H), 4.50 (d,  $J = 10.1$  Hz, 1H), 4.36 (q,  $J = 7.1$  Hz, 4H), 2.90 (dd,  $J = 13.2, 4.4$  Hz, 1H), 1.98 - 1.88 (m, 2H), 1.83 - 1.76 (m, 2H), 1.71 - 1.53 (m, 9H), 1.44 - 1.33 (m, 8H), 1.27 - 1.21 (m, 5H), 1.11 (s, 3H), 0.92 (s, 3H), 0.90 (s, 3H), 0.88 (s, 3H), 0.77 (s, 3H), 0.55 (s, 6H).

**<sup>13</sup>C NMR (75 MHz, CDCl<sub>3</sub>):** δ<sub>C</sub> 177.5, 171.7, 171.6, 165.6, 165.4, 165.4, 165.0, 151.8, 151.8, 151.2 (d, *J* = 245.1 Hz), 151.1 (d, *J* = 245.2 Hz), 144.1, 142.8, 142.8, 136.5, 133.2, 133.2, 132.8, 132.7, 128.6 (x2), 128.5 (d, *J* = 25.4 Hz), 128.5 (d, *J* = 25.4 Hz), 128.2 (x2), 128.1, 128.0, 128.0, 125.2, 125.2, 121.8, 112.3, 112.2, 88.1, 88.0, 82.7, 72.1, 66.1, 61.4, 61.3, 54.7, 52.9, 52.8, 51.1, 51.1, 47.6, 46.8, 46.0, 43.6, 41.9, 41.8, 41.4, 39.5, 39.4, 38.3, 34.0, 33.2, 32.4, 30.8, 29.8, 28.4, 27.6, 26.1, 23.8, 23.5, 23.1, 18.2, 17.3, 16.9, 16.6, 14.5, 14.5. **<sup>19</sup>F NMR (282 MHz, CDCl<sub>3</sub>):** δ<sub>F</sub> -56.6. **HRMS (ESI<sup>+</sup>):** Calcd for C<sub>71</sub>H<sub>79</sub>F<sub>2</sub>I<sub>2</sub>N<sub>8</sub>O<sub>12</sub> [M+H]<sup>+</sup> 1527.3875, found 1527.3849.

**(13k)** White solid, yield: 90%, mp: 150-152 °C. [α]<sub>D</sub><sup>24</sup> +32 (*c* 0.05, CHCl<sub>3</sub>). **IR (ν<sub>max</sub> / cm<sup>-1</sup>):** 2948, 1725, 1617, 1485, 1261, 1199, 1158, 803, 733, 697. **<sup>1</sup>H NMR (300 MHz, CDCl<sub>3</sub>):** δ<sub>H</sub> 8.88 (s, 2H), 8.15 - 8.07 (m, 2H), 7.97 (s, 1H), 7.83 (s, 1H), 7.38 - 7.30 (m, 5H), 5.76 - 5.59 (m, 4H), 5.26 (t, *J* = 3.4 Hz, 1H), 5.18 - 4.95 (m, 6H), 4.87 (td, *J* = 11.1, 4.3 Hz, 1H), 4.42 - 4.32 (m, 4H), 4.28 (d, *J* = 10.2 Hz, 1H), 2.90 (dd, *J* = 13.9, 4.2 Hz, 1H), 1.98 - 1.87 (m, 2H), 1.72 - 1.52 (m, 9H), 1.42 - 1.36 (m, 7H), 1.28 - 1.21 (m, 8H), 1.11 (s, 3H), 0.92 (s, 3H), 0.90 (s, 3H), 0.88 (s, 3H), 0.73 (s, 3H), 0.62 (s, 3H), 0.55 (s, 3H). **<sup>13</sup>C NMR (75 MHz, CDCl<sub>3</sub>):** δ<sub>C</sub> 177.4, 171.5, 171.5, 165.4, 165.3, 164.9, 164.8, 152.2, 152.2, 148.4 (ddd, *J* = 252.5, 19.7, 10.3 Hz), 148.3 (ddd, *J* = 252.4, 19.2, 9.8 Hz), 144.1, 143.3 (ddd, *J* = 256.6, 32.2, 15.8 Hz), 143.2 (ddd, *J* = 257.3, 33.0, 16.5 Hz), 142.3, 142.2, 141.6 (dd, *J* = 253.7, 14.3 Hz), 141.6 (dd, *J* = 254.4, 14.7 Hz), 136.4, 128.5 (x2), 128.1 (x2), 128.0, 126.1 (d, *J* = 6.9 Hz), 126.1 (d, *J* = 7.0 Hz), 125.7 (dd, *J* = 14.4, 6.0 Hz), 125.7 (dd, *J* = 14.2, 6.0 Hz), 124.8, 124.7, 121.7, 111.2, 111.1, 109.9 (dd, *J* = 17.2, 5.4 Hz), 109.9, (dd, *J* = 17.3, 5.5 Hz), 82.5, 72.0, 66.0, 61.3, 61.3, 54.7, 52.4 (d, *J* = 14.9 Hz), 52. (d, *J* = 14.6 Hz), 51.0, 50.8, 47.5, 46.7, 45.9, 43.6, 41.7, 41.4, 39.4, 33.9, 33.2, 32.4, 30.8, 29.8, 28.2, 27.6, 25.8, 23.7, 23.5, 23.0, 18.2, 17.2, 16.8, 16.3, 14.4, 14.4. **<sup>19</sup>F NMR (282 MHz, CDCl<sub>3</sub>):** δ<sub>F</sub> -134.7 (dd, *J* = 22.6, 4.7 Hz), -134.9 (dd, *J* = 22.2, 4.9 Hz), -142.7 - -142.8 (m, 2F), -150.2 (dd, *J* = 22.3, 18.1 Hz), -150.4 (dd, *J* = 22.7, 18.3 Hz). **HRMS (ESI<sup>+</sup>):** Calcd for C<sub>71</sub>H<sub>77</sub>F<sub>6</sub>N<sub>8</sub>O<sub>12</sub> [M+H]<sup>+</sup> 1347.5565, found 1347.5540.

## V. General procedure for the synthesis of compounds 14a-k

To a mixture of propargylated quinolone **12a-k** (0.19 mmol) and azide (0.12 g, 0.19 mmol) in CH<sub>2</sub>Cl<sub>2</sub> (1 mL) and H<sub>2</sub>O (1 mL) were added CuSO<sub>4</sub>·5H<sub>2</sub>O (9.48 mg, 0.038 mmol) and sodium ascorbate (15.05 mg, 0.076 mmol). The reaction mixture was stirred at room temperature for 8-10 h then diluted with water and extracted with CH<sub>2</sub>Cl<sub>2</sub>. The organic layers were washed with

brine, dried over anhydrous Na<sub>2</sub>SO<sub>4</sub> and concentrated under reduced pressure. The residue was purified using silica gel flash column chromatography.

**(14a)** White solid, yield: 94%, mp: 272-274 °C.  $[\alpha]_D^{24} +24$  (*c* 0.05, CHCl<sub>3</sub>). **IR** ( $\nu_{\max}$  / cm<sup>-1</sup>): 2235, 1723, 1626, 1485, 1227, 1160, 1110, 815, 1133, 696. **<sup>1</sup>H NMR (300 MHz, CDCl<sub>3</sub>)**:  $\delta_{\text{H}}$  8.63 (s, 1H), 8.42 - 8.36 (m, 1H), 7.72 (s, 1H), 7.67 - 7.55 (m, 2H), 7.36 - 7.28 (m, 5H), 5.50 (s, 2H), 5.27 (t, *J* = 3.4 Hz, 1H), 5.14 (s, 2H), 5.11 - 5.01 (m, 2H), 4.52 (dd, *J* = 10.6, 4.5 Hz, 1H), 4.37 (q, *J* = 7.1 Hz, 2H), 2.89 (dd, *J* = 13.4, 3.9 Hz, 1H), 2.04 - 1.93 (m, 2H), 1.83 - 1.80 (m, 2H), 1.70 - 1.52 (m, 9H), 1.46 - 1.34 (m, 7H), 1.28 - 1.21 (m, 5H), 1.10 (s, 3H), 0.91 (s, 3H), 0.89 (s, 3H), 0.84 (s, 3H), 0.74 (s, 3H), 0.60 (s, 3H), 0.58 (s, 3H). **<sup>13</sup>C NMR (75 MHz, CDCl<sub>3</sub>)**:  $\delta_{\text{C}}$  177.5, 173.2, 165.7, 165.1, 149.1, 143.9, 141.9, 137.4, 136.5, 133.1, 131.9, 130.2, 128.5 (x2), 128.1 (x2), 128.0, 127.3, 124.3, 122.4, 118.4, 111.7, 84.3, 66.1, 61.2, 55.3, 51.4, 49.8, 47.6, 46.8, 46.0, 41.8, 41.5, 39.4, 38.1, 37.8, 36.9, 34.0, 33.2, 32.7, 32.5, 30.8, 29.8, 28.2, 27.7, 26.0, 23.8, 23.5, 23.2, 18.2, 17.0, 16.5, 15.4, 14.5. **HRMS (ESI<sup>+</sup>)**: Calcd for C<sub>54</sub>H<sub>68</sub>ClN<sub>4</sub>O<sub>7</sub> [M+H]<sup>+</sup> 919.4777, found 919.4749.

**(14b)** White solid, yield: 96%, mp: 195-196 °C.  $[\alpha]_D^{24} +16$  (*c* 0.05, CHCl<sub>3</sub>). **IR** ( $\nu_{\max}$  / cm<sup>-1</sup>): 2934, 1731, 1618, 1492, 1213, 1551, 1124, 816, 735, 698. **<sup>1</sup>H NMR (300 MHz, CDCl<sub>3</sub>)**:  $\delta_{\text{H}}$  8.64 (s, 1H), 8.12 (dd, *J* = 8.8, 2.9 Hz, 1H), 7.71 (dd, *J* = 9.4, 4.0 Hz, 1H), 7.68 (s, 1H), 7.40 - 7.30 (m, 6H), 5.51 (s, 2H), 5.27 (t, *J* = 3.5 Hz, 1H), 5.13 (s, 2H), 5.11 - 5.01 (m, 2H), 4.52 (dd, *J* = 10.9, 4.9 Hz, 1H), 4.39 (q, *J* = 7.1 Hz, 2H), 2.89 (dd, *J* = 13.7, 4.4 Hz, 1H), 2.02 - 1.93 (m, 1H), 1.84 - 1.80 (m, 2H), 1.67 - 1.52 (m, 11H), 1.43 - 1.37 (m, 5H), 1.28 - 1.20 (m, 6H), 1.10 (s, 3H), 0.91 (s, 3H), 0.89 (s, 3H), 0.84 (s, 3H), 0.75 (s, 3H), 0.61 (s, 3H), 0.58 (s, 3H). **<sup>13</sup>C NMR (75 MHz, CDCl<sub>3</sub>)**:  $\delta_{\text{C}}$  177.5, 173.5 (d, *J* = 2.1 Hz), 165.6, 165.5, 160.2 (d, *J* = 248.3 Hz), 149.0, 143.9, 142.1, 136.5, 135.3 (d, *J* = 1.6 Hz), 131.2 (d, *J* = 6.0 Hz), 128.5 (x2), 128.1 (x2), 128.1, 124.0, 122.3, 121.3 (d, *J* = 25.0 Hz), 118.9 (d, *J* = 7.8 Hz), 113.1 (d, *J* = 22.9 Hz), 111.1, 84.3, 66.1, 61.3, 55.3, 51.4, 50.0, 47.6, 46.8, 46.0, 41.8, 41.5, 39.4, 38.0, 37.8, 36.9, 34.0, 33.2, 32.7, 32.5, 30.8, 29.8, 28.2, 27.7, 26.0, 23.8, 23.5, 23.1, 18.2, 17.0, 16.6, 15.4, 14.6. **<sup>19</sup>F NMR (282 MHz, CDCl<sub>3</sub>)**:  $\delta_{\text{F}}$  -114.7. **HRMS (ESI<sup>+</sup>)**: Calcd for C<sub>54</sub>H<sub>68</sub>FN<sub>4</sub>O<sub>7</sub> [M+H]<sup>+</sup> 903.5072, found 903.5054.

**(14c)** White solid, yield: 92%, mp: 169-171 °C.  $[\alpha]_D^{24} +30$  (*c* 0.05, CHCl<sub>3</sub>). **IR** ( $\nu_{\max}$  / cm<sup>-1</sup>): 2048, 1726, 1610, 1503, 1157, 1125, 1098, 824, 732, 697. **<sup>1</sup>H NMR (300 MHz, CDCl<sub>3</sub>)**:  $\delta_{\text{H}}$  8.70 (s, 1H), 8.66 (s, 1H), 7.85 - 7.79 (m, 3H), 7.37 - 7.29 (m, 5H), 5.54 (s, 2H), 5.26 (t, *J* = 3.5

Hz, 1H), 5.15 (s, 2H), 5.11 - 5.01 (m, 2H), 4.51 (dd,  $J = 10.5, 4.6$  Hz, 1H), 4.33 (q,  $J = 7.1$  Hz, 2H), 2.88 (dd,  $J = 14.0, 4.4$  Hz, 1H), 2.01 - 1.92 (m, 1H), 1.83 - 1.78 (m, 2H), 1.70 - 1.48 (m, 10H), 1.41 - 1.32 (m, 6H), 1.28 - 1.16 (m, 6H), 1.09 (s, 3H), 0.90 (s, 3H), 0.88 (s, 3H), 0.82 (s, 3H), 0.72 (s, 3H), 0.58 (s, 3H), 0.57 (s, 3H).  $^{13}\text{C NMR}$  (75 MHz,  $\text{CDCl}_3$ ):  $\delta_{\text{C}}$  177.5, 173.4, 165.6, 164.8, 149.8, 143.9, 141.7, 140.9, 136.5, 129.2 (q,  $J = 3.2$  Hz), 128.9, 128.5 (x2), 128.1 (x2), 128.0, 127.5 (q,  $J = 33.7$  Hz), 125.7 (q,  $J = 4.0$  Hz), 124.3, 123.4 (q,  $J = 272.9$  Hz), 122.3, 117.6, 112.6, 84.3, 66.0, 61.3, 55.2, 51.4, 49.7, 47.6, 46.8, 46.0, 41.8, 41.5, 39.3, 38.0, 37.8, 36.9, 34.0, 33.2, 32.6, 32.5, 30.8, 29.8, 28.1, 27.7, 25.9, 23.7, 23.5, 23.1, 18.2, 16.9, 16.5, 15.4, 14.5.  $^{19}\text{F NMR}$  (282 MHz,  $\text{CDCl}_3$ ):  $\delta_{\text{F}}$  -62.3. **HRMS (ESI<sup>+</sup>)**: Calcd for  $\text{C}_{55}\text{H}_{68}\text{F}_3\text{N}_4\text{O}_7$   $[\text{M}+\text{H}]^+$  953.5040, found 953.5033

**(14d)** White solid, yield: 93%, mp: 213-215 °C.  $[\alpha]_{\text{D}}^{24} +48$  ( $c$  0.05,  $\text{CHCl}_3$ ). **IR** ( $\nu_{\text{max}}$  /  $\text{cm}^{-1}$ ): 2927, 1726, 1610, 1500, 1231, 1157, 1125, 806, 749, 699.  $^1\text{H NMR}$  (300 MHz,  $\text{CDCl}_3$ ):  $\delta_{\text{H}}$  8.78 - 8.73 (m, 1H), 8.67 (s, 1H), 7.87 - 7.82 (m, 2H), 7.75 - 7.70 (m, 1H), 7.39 - 7.30 (m, 5H), 5.53 (s, 2H), 5.26 (t,  $J = 3.8$  Hz, 1H), 5.14 (s, 2H), 5.11 - 5.01 (m, 2H), 4.52 (dd,  $J = 10.8, 4.9$  Hz, 1H), 4.39 (q,  $J = 7.1$  Hz, 2H), 2.89 (dd,  $J = 13.8, 3.8$  Hz, 1H), 2.02 - 1.93 (m, 1H), 1.84 - 1.79 (m, 2H), 1.67 - 1.52 (m, 11H), 1.44 - 1.39 (m, 6H), 1.29 - 1.21 (m, 5H), 1.09 (s, 3H), 0.91 (s, 3H), 0.89 (s, 3H), 0.83 (s, 3H), 0.73 (s, 3H), 0.58 (s, 3H), 0.57 (s, 3H).  $^{13}\text{C NMR}$  (75 MHz,  $\text{CDCl}_3$ ):  $\delta_{\text{C}}$  177.5, 173.6, 165.6, 165.1, 149.7, 143.9, 141.8, 140.9, 136.6, 129.3 (q,  $J = 3.1$  Hz), 129.0, 128.6 (x2), 128.1 (x2), 128.1, 127.6 (q,  $J = 34.1$  Hz), 125.9 (q,  $J = 4.0$  Hz), 124.1, 123.8 (q,  $J = 271.0$  Hz), 122.4, 117.5, 112.3, 84.3, 66.1, 61.3, 55.3, 51.5, 49.8, 47.6, 46.9, 46.0, 41.8, 41.5, 39.4, 38.1, 37.8, 37.0, 34.0, 33.2, 32.7, 32.5, 30.8, 29.8, 28.2, 27.8, 26.0, 23.8, 23.5, 23.2, 18.2, 17.0, 16.6, 15.4, 14.6.  $^{19}\text{F NMR}$  (282 MHz,  $\text{CDCl}_3$ ):  $\delta_{\text{F}}$  -62.3. **HRMS (ESI<sup>+</sup>)**: Calcd for  $\text{C}_{55}\text{H}_{67}\text{F}_3\text{N}_4\text{NaO}_8$   $[\text{M}+\text{Na}]^+$  991.4809, found 991.4825.

**(14e)** White solid, yield: 89%, mp: 141-143 °C.  $[\alpha]_{\text{D}}^{24} +21$  ( $c$  0.05,  $\text{CHCl}_3$ ). **IR** ( $\nu_{\text{max}}$  /  $\text{cm}^{-1}$ ): 2937, 1724, 1608, 1493, 1227, 1160, 1030, 804, 749, 697.  $^1\text{H NMR}$  (300 MHz,  $\text{CDCl}_3$ ):  $\delta_{\text{H}}$  8.66 (s, 1H), 8.29 (dd,  $J = 5.9, 1.9$  Hz, 1H), 7.74 (s, 1H), 7.40 - 7.27 (m, 7H), 5.62 (d,  $J = 3.1$  Hz, 2H), 5.26 (t,  $J = 3.5$  Hz, 1H), 5.14 (s, 2H), 5.10 - 5.00 (m, 2H), 4.51 (dd,  $J = 11.1, 4.8$  Hz, 1H), 4.36 (q,  $J = 7.1$  Hz, 2H), 2.88 (dd,  $J = 13.8, 4.4$  Hz, 1H), 2.01 - 1.92 (m, 1H), 1.83 - 1.79 (m, 2H), 1.70 - 1.51 (m, 9H), 1.45 - 1.31 (m, 7H), 1.28 - 1.14 (m, 4H), 1.09 (s, 3H), 1.03 - 0.96 (m, 2H), 0.90 (s, 3H), 0.88 (s, 3H), 0.82 (s, 3H), 0.73 (s, 3H), 0.57 (s, 3H), 0.56 (s, 3H).  $^{13}\text{C NMR}$  (75 MHz,  $\text{CDCl}_3$ ):  $\delta_{\text{C}}$  177.5, 173.1, 165.7, 164.9, 151.8 (d,  $J = 249.6$  Hz), 151.3, 143.9, 142.8, 136.5, 131.8, 128.5 (x2), 128.4 (d,  $J = 31.8$  Hz), 128.1 (x2), 128.0, 125.4 (d,  $J = 7.7$  Hz),

124.2 (d,  $J = 3.4$  Hz), 123.9 (d,  $J = 6.6$  Hz), 122.3, 119.8 (d,  $J = 22.0$  Hz), 111.9, 84.1, 66.0, 61.1, 55.2, 52.6 (d,  $J = 15.9$  Hz), 51.3, 47.6, 46.8, 45.9, 41.8, 41.5, 39.3, 38.0, 37.7, 36.9, 33.9, 33.2, 32.6, 32.4, 30.8, 28.1, 27.7, 25.9, 23.7, 23.5, 23.5, 23.1, 18.2, 16.9, 16.4, 15.4, 14.5.  **$^{19}\text{F}$  NMR (282 MHz,  $\text{CDCl}_3$ ):**  $\delta_{\text{F}}$  -122.0. **HRMS (ESI<sup>+</sup>):** Calcd for  $\text{C}_{54}\text{H}_{68}\text{FN}_4\text{O}_7$   $[\text{M}+\text{H}]^+$  903.5072, found 903.5106.

**(14f)** White solid, yield: 87%, mp: 234-236 °C.  $[\alpha]_{\text{D}}^{24} +39$  ( $c$  0.05,  $\text{CHCl}_3$ ). **IR ( $\nu_{\text{max}}$  /  $\text{cm}^{-1}$ ):** 2930, 1728, 1620, 1458, 1213, 1149, 1110, 786, 724, 699.  **$^1\text{H}$  NMR (300 MHz,  $\text{CDCl}_3$ ):**  $\delta_{\text{H}}$  9.43 (s, 1H), 8.49 (d,  $J = 8.3$  Hz, 1H), 8.14 (d,  $J = 7.2$  Hz, 1H), 7.91 (s, 1H), 7.61 (t,  $J = 7.9$  Hz, 1H), 7.39 - 7.29 (m, 5H), 5.48 (s, 2H), 5.28 (t,  $J = 3.5$  Hz, 1H), 5.19 (s, 2H), 5.11 - 5.01 (m, 2H), 4.61 - 4.54 (m, 1H), 4.49 (q,  $J = 7.1$  Hz, 2H), 2.90 (dd,  $J = 13.4, 3.6$  Hz, 1H), 2.03 - 1.92 (m, 1H), 1.88 - 1.80 (m, 2H), 1.71 - 1.57 (m, 9H), 1.52 - 1.38 (m, 6H), 1.34 - 1.18 (m, 5H), 1.11 (s, 3H), 1.06 - 0.99 (m, 2H), 0.91 (s, 3H), 0.89 (s, 6H), 0.84 (s, 3H), 0.75 (s, 3H), 0.59 (s, 3H).  **$^{13}\text{C}$  NMR (75 MHz,  $\text{CDCl}_3$ ):**  $\delta_{\text{C}}$  177.6, 165.9, 164.4, 163.6, 153.1, 147.6, 143.9, 143.5, 136.5, 130.3 (q,  $J = 5.4$  Hz), 128.5 (x2), 128.4, 128.1 (x2), 128.0, 127.7, 126.0, 125.3, 124.7, 123.9 (q,  $J = 271.3$  Hz), 122.4, 115.2, 84.2, 69.2, 66.1, 62.0, 55.3, 51.3, 47.6, 46.9, 46.0, 41.8, 41.5, 39.4, 38.1, 37.9, 37.0, 34.0, 33.2, 32.7, 32.5, 30.8, 28.3, 27.7, 26.0, 23.8, 23.6, 23.5, 23.2, 18.3, 17.0, 16.7, 15.5, 14.4.  **$^{19}\text{F}$  NMR (282 MHz,  $\text{CDCl}_3$ ):**  $\delta_{\text{F}}$  -60.2. **HRMS (ESI<sup>+</sup>):** Calcd for  $\text{C}_{55}\text{H}_{68}\text{F}_3\text{N}_4\text{O}_7$   $[\text{M}+\text{H}]^+$  953.5040, found 953.5078.

**(14g)** White solid, yield: 85%, mp: 183-185 °C.  $[\alpha]_{\text{D}}^{24} +18$  ( $c$  0.05,  $\text{CHCl}_3$ ). **IR ( $\nu_{\text{max}}$  /  $\text{cm}^{-1}$ ):** 2935, 1723, 1620, 1492, 1229, 1153, 1030, 803, 738, 699.  **$^1\text{H}$  NMR (300 MHz,  $\text{CDCl}_3$ ):**  $\delta_{\text{H}}$  8.66 (s, 1H), 8.48 (dd,  $J = 8.0, 1.6$  Hz, 1H), 7.64 (s, 1H), 7.57 - 7.52 (m, 1H), 7.42 - 7.29 (m, 6H), 5.67 (s, 2H), 5.26 (t,  $J = 3.6$  Hz, 1H), 5.13 - 5.01 (m, 4H), 4.52 (dd,  $J = 10.9, 4.9$  Hz, 1H), 4.37 (q,  $J = 7.1$  Hz, 2H), 2.89 (dd,  $J = 13.7, 4.3$  Hz, 1H), 2.02 - 1.91 (m, 1H), 1.84 - 1.78 (m, 2H), 1.71 - 1.49 (m, 9H), 1.46 - 1.37 (m, 6H), 1.32 - 1.15 (m, 5H), 1.09 (s, 3H), 1.04 - 0.94 (m, 2H), 0.90 (s, 3H), 0.88 (s, 3H), 0.84 (s, 3H), 0.75 (s, 3H), 0.61 (s, 3H), 0.58 (s, 3H).  **$^{13}\text{C}$  NMR (75 MHz,  $\text{CDCl}_3$ ):**  $\delta_{\text{C}}$  177.5, 173.1, 165.6, 164.7, 152.5, 143.9, 142.4, 137.8 (q,  $J = 1.6$  Hz), 136.5, 132.2, 132.0, 128.5 (x2), 128.0 (x2), 128.0, 127.4, 125.7, 125.4, 123.7, 122.3, 120.8 (q,  $J = 260.6$  Hz), 112.5, 84.1, 66.0, 61.2, 55.2, 52.7, 51.3, 47.6, 46.8, 45.9, 41.8, 41.5, 39.3, 38.0, 37.8, 36.9, 33.9, 33.2, 32.6, 32.4, 30.8, 28.1, 27.7, 25.9, 23.7, 23.5, 23.5, 23.1, 18.2, 16.9, 16.5, 15.4, 14.5.  **$^{19}\text{F}$  NMR (282 MHz,  $\text{CDCl}_3$ ):**  $\delta_{\text{F}}$  -119.1. **HRMS (ESI<sup>+</sup>):** Calcd for  $\text{C}_{55}\text{H}_{67}\text{F}_3\text{N}_4\text{NaO}_8$   $[\text{M}+\text{Na}]^+$  991.4809, found 991.4825.



**(14h)** White solid, yield: 93%, mp: 155-157 °C.  $[\alpha]_D^{24} +42$  (*c* 0.05, CHCl<sub>3</sub>). IR ( $\nu_{\max}$  / cm<sup>-1</sup>): 2939, 1718, 1613, 1475, 1216, 1168, 1126, 803, 742, 694. <sup>1</sup>H NMR (300 MHz, CDCl<sub>3</sub>):  $\delta_{\text{H}}$  8.71 (s, 1H), 8.54 (d, *J* = 8.3 Hz, 1H), 7.99 (s, 1H), 7.83 (s, 1H), 7.58 (d, *J* = 8.4 Hz, 1H), 7.37 - 7.29 (m, 5H), 5.55 (s, 2H), 5.26 (t, *J* = 3.6 Hz, 1H), 5.16 (s, 2H), 5.10 - 5.01 (m, 2H), 4.51 (dd, *J* = 10.7, 4.8 Hz, 1H), 4.34 (q, *J* = 7.1 Hz, 2H), 2.88 (dd, *J* = 13.6, 3.6 Hz, 1H), 2.01 - 1.92 (m, 1H), 1.84 - 1.75 (m, 2H), 1.70 - 1.47 (m, 9H), 1.42 - 1.30 (m, 6H), 1.28 - 1.14 (m, 5H), 1.09 (s, 3H), 1.02 - 0.96 (m, 2H), 0.90 (s, 3H), 0.88 (s, 3H), 0.82 (s, 3H), 0.72 (s, 3H), 0.57 (s, 6H). <sup>13</sup>C NMR (75 MHz, CDCl<sub>3</sub>):  $\delta_{\text{C}}$  177.5, 173.5, 165.6, 164.9, 149.9, 143.8, 141.4, 138.8, 136.5, 134.4 (q, *J* = 33.7 Hz), 129.5 (q, *J* = 252.7 Hz), 129.3, 128.5 (x2), 128.1 (x2), 128.0, 125.2, 124.3, 122.3, 121.5 (q, *J* = 3.2 Hz), 114.0 (q, *J* = 3.7 Hz), 112.4, 84.2, 66.0, 61.2, 55.2, 51.4, 49.4, 47.6, 46.8, 45.9, 41.8, 41.4, 39.3, 38.0, 37.7, 36.9, 33.9, 33.2, 32.6, 32.4, 30.8, 29.8, 28.1, 27.7, 25.9, 23.7, 23.4, 23.1, 18.2, 16.9, 16.4, 15.4, 14.5. <sup>19</sup>F NMR (282 MHz, CDCl<sub>3</sub>):  $\delta_{\text{F}}$  -62.8. HRMS (ESI<sup>+</sup>): Calcd for C<sub>55</sub>H<sub>68</sub>F<sub>3</sub>N<sub>4</sub>O<sub>7</sub> [M+H]<sup>+</sup> 953.5040, found 953.5040.

**(14i)** White solid, yield: 86%, mp: 251-253 °C.  $[\alpha]_D^{24} +35$  (*c* 0.05, CHCl<sub>3</sub>). IR ( $\nu_{\max}$  / cm<sup>-1</sup>): 2937, 1724, 1606, 1490, 1211, 1160, 1124, 803, 747, 697. <sup>1</sup>H NMR (300 MHz, CDCl<sub>3</sub>):  $\delta_{\text{H}}$  8.65 (s, 1H), 8.42 (s, 1H), 7.73 (d, *J* = 2.1 Hz, 1H), 7.50 (dd, *J* = 13.7, 2.4 Hz, 1H), 7.37 - 7.29 (m, 5H), 5.60 (d, *J* = 3.1 Hz, 2H), 5.27 (t, *J* = 3.6 Hz, 1H), 5.14 (s, 2H), 5.11 - 5.01 (m, 2H), 4.53 (dd, *J* = 11.1, 4.7 Hz, 1H), 4.37 (q, *J* = 7.1 Hz, 2H), 2.89 (dd, *J* = 13.4, 4.2 Hz, 1H), 2.01 - 1.91 (m, 1H), 1.84 - 1.80 (m, 2H), 1.71 - 1.67 (m, 2H), 1.62 - 1.46 (m, 8H), 1.42 - 1.32 (m, 5H), 1.30 - 1.15 (m, 5H), 1.10 (s, 3H), 1.04 - 0.97 (m, 2H), 0.91 (s, 3H), 0.89 (s, 3H), 0.84 (s, 3H), 0.75 (s, 3H), 0.57 (s, 6H). <sup>13</sup>C NMR (75 MHz, CDCl<sub>3</sub>):  $\delta_{\text{C}}$  177.5, 171.7, 165.7, 164.5, 151.6 (d, *J* = 252.6 Hz), 151.4, 143.9, 142.4, 136.5, 132.6, 128.5 (x2), 128.1 (x2), 128.0, 127.3 (d, *J* = 6.2 Hz), 127.0 (d, *J* = 3.1 Hz), 124.0, 123.1 (d, *J* = 26.3 Hz), 122.3, 118.2 (d, *J* = 9.8 Hz), 112.2, 84.2, 66.1, 61.3, 55.2, 52.6 (d, *J* = 15.7 Hz), 51.4, 47.6, 46.8, 46.0, 41.8, 41.5, 39.4, 38.0, 37.8, 36.9, 34.0, 33.2, 32.6, 32.5, 30.8, 28.1, 27.7, 25.9, 23.8, 23.5, 23.5, 23.1, 18.2, 16.9, 16.5, 15.4, 14.5. <sup>19</sup>F NMR (282 MHz, CDCl<sub>3</sub>):  $\delta_{\text{F}}$  -56.6. HRMS (ESI<sup>+</sup>): Calcd for C<sub>54</sub>H<sub>67</sub>BrFN<sub>4</sub>O<sub>7</sub> [M+H]<sup>+</sup> 981.4177, found 981.4130.

**(14j)** White solid, yield: 88%, mp: 177-179 °C.  $[\alpha]_D^{24} +45$  (*c* 0.05, CHCl<sub>3</sub>). IR ( $\nu_{\max}$  / cm<sup>-1</sup>): 2933, 1720, 1475, 1217, 1150, 1078, 802, 747, 696. <sup>1</sup>H NMR (300 MHz, CDCl<sub>3</sub>):  $\delta_{\text{H}}$  8.66 (s, 1H), 8.62 (d, *J* = 1.3 Hz, 1H), 7.71 (d, *J* = 1.7 Hz, 1H), 7.66 (dd, *J* = 13.6, 1.9 Hz, 1H), 7.39 - 7.28 (m, 5H), 5.59 (d, *J* = 3.1 Hz, 2H), 5.27 (t, *J* = 3.8 Hz, 1H), 5.14 (s, 2H), 5.11 - 5.01 (m, 2H), 4.53 (dd, *J* = 11.3, 4.6 Hz, 1H), 4.38 (q, *J* = 7.1 Hz, 2H), 2.89 (dd, *J* = 13.3, 4.4 Hz, 1H),

2.02 - 1.91 (m, 1H), 1.86 - 1.79 (m, 2H), 1.71 - 1.46 (m, 11H), 1.42 - 1.33 (m, 5H), 1.28 - 1.15 (m, 4H), 1.10 (s, 3H), 1.05 - 0.97 (m, 2H), 0.91 (s, 3H), 0.89 (s, 3H), 0.84 (s, 3H), 0.74 (s, 3H), 0.58 (s, 3H), 0.56 (s, 3H).  $^{13}\text{C}$  NMR (75 MHz,  $\text{CDCl}_3$ ):  $\delta_{\text{C}}$  177.5, 171.4, 165.7, 164.4, 151.3, 151.1 (d,  $J = 254.3$  Hz), 143.8, 142.3, 136.5, 133.2 (d,  $J = 3.4$  Hz), 132.6, 128.5 (x2), 128.4 (d,  $J = 24.9$  Hz), 128.1 (x2), 128.0, 127.9 (d,  $J = 6.8$  Hz), 124.0, 122.3, 112.3, 87.9 (d,  $J = 8.5$  Hz), 84.1, 66.0, 61.2, 55.2, 52.6 (d,  $J = 15.2$  Hz), 51.3, 47.6, 46.8, 45.9, 41.8, 41.5, 39.4, 38.0, 37.7, 36.9, 33.9, 33.2, 32.6, 32.4, 30.8, 29.8, 28.1, 27.7, 25.9, 23.7, 23.5, 23.1, 18.2, 16.9, 16.4, 15.4, 14.5.  $^{19}\text{F}$  NMR (282 MHz,  $\text{CDCl}_3$ ):  $\delta_{\text{F}}$  -119.9. HRMS (ESI<sup>+</sup>): Calcd for  $\text{C}_{54}\text{H}_{67}\text{FIN}_4\text{O}_7$  [M+H]<sup>+</sup> 1029.4038, found 1029.4081.

(14k) White solid, yield: 91%, mp: 199-201 °C.  $[\alpha]_{\text{D}}^{24} +27$  (c 0.05,  $\text{CHCl}_3$ ). IR ( $\nu_{\text{max}}$  /  $\text{cm}^{-1}$ ): 2936, 1724, 1619, 1488, 1211, 1156, 1104, 803, 746, 696.  $^1\text{H}$  NMR (300 MHz,  $\text{CDCl}_3$ ):  $\delta_{\text{H}}$  8.68 (s, 1H), 8.17 - 8.11 (m, 1H), 7.77 (s, 1H), 7.37 - 7.26 (m, 5H), 5.60 (d,  $J = 2.9$  Hz, 2H), 5.27 (t,  $J = 3.7$  Hz, 1H), 5.11 - 5.01 (m, 2H), 4.54 (dd,  $J = 10.7, 5.0$  Hz, 1H), 4.38 (q,  $J = 7.1$  Hz, 2H), 2.89 (dd,  $J = 14.1, 4.4$  Hz, 1H), 2.02 - 1.91 (m, 1H), 1.85 - 1.79 (m, 2H), 1.68 - 1.50 (m, 10H), 1.44 - 1.36 (m, 5H), 1.28 - 1.18 (m, 5H), 1.10 (s, 3H), 1.05 - 0.97 (m, 2H), 0.91 (s, 3H), 0.89 (s, 3H), 0.85 (s, 3H), 0.77 (s, 3H), 0.62 (s, 3H), 0.58 (s, 3H).  $^{13}\text{C}$  NMR (75 MHz,  $\text{CDCl}_3$ ):  $\delta_{\text{C}}$  177.5, 171.4, 165.6, 164.5, 151.8, 148.6 (d,  $J = 242.2$  Hz), 143.9, 143.5 (d,  $J = 256.4$  Hz), 142.0, 141.5 (d,  $J = 250.5$  Hz), 136.5, 128.5 (x2), 128.1 (x2), 128.0, 126.0 (d,  $J = 2.3$  Hz), 125.7 (dd,  $J = 5.0, 2.5$  Hz), 123.9 (d,  $J = 5.1$  Hz), 122.3, 111.5, 110.3 (dd,  $J = 18.1, 3.2$  Hz), 84.3, 66.1, 61.4, 55.3, 52.2 (d,  $J = 15.0$  Hz), 51.4, 47.6, 46.8, 46.0, 41.8, 41.5, 39.4, 38.1, 37.8, 36.9, 34.0, 33.2, 32.7, 32.5, 30.8, 29.8, 28.1, 27.7, 26.0, 23.8, 23.5, 23.1, 18.2, 17.0, 16.5, 15.4, 14.5.  $^{19}\text{F}$  NMR (282 MHz,  $\text{CDCl}_3$ ):  $\delta_{\text{F}}$  -134.7 (dd,  $J = 22.8, 5.6$  Hz), -143.1 (dd,  $J = 18.6, 5.5$  Hz), -150.0 (dd,  $J = 23.0, 18.5$  Hz). HRMS (ESI<sup>+</sup>): Calcd for  $\text{C}_{54}\text{H}_{66}\text{F}_3\text{N}_4\text{O}_7$  [M+H]<sup>+</sup> 939.4884, found 939.4875.

## VI. NMR Spectra

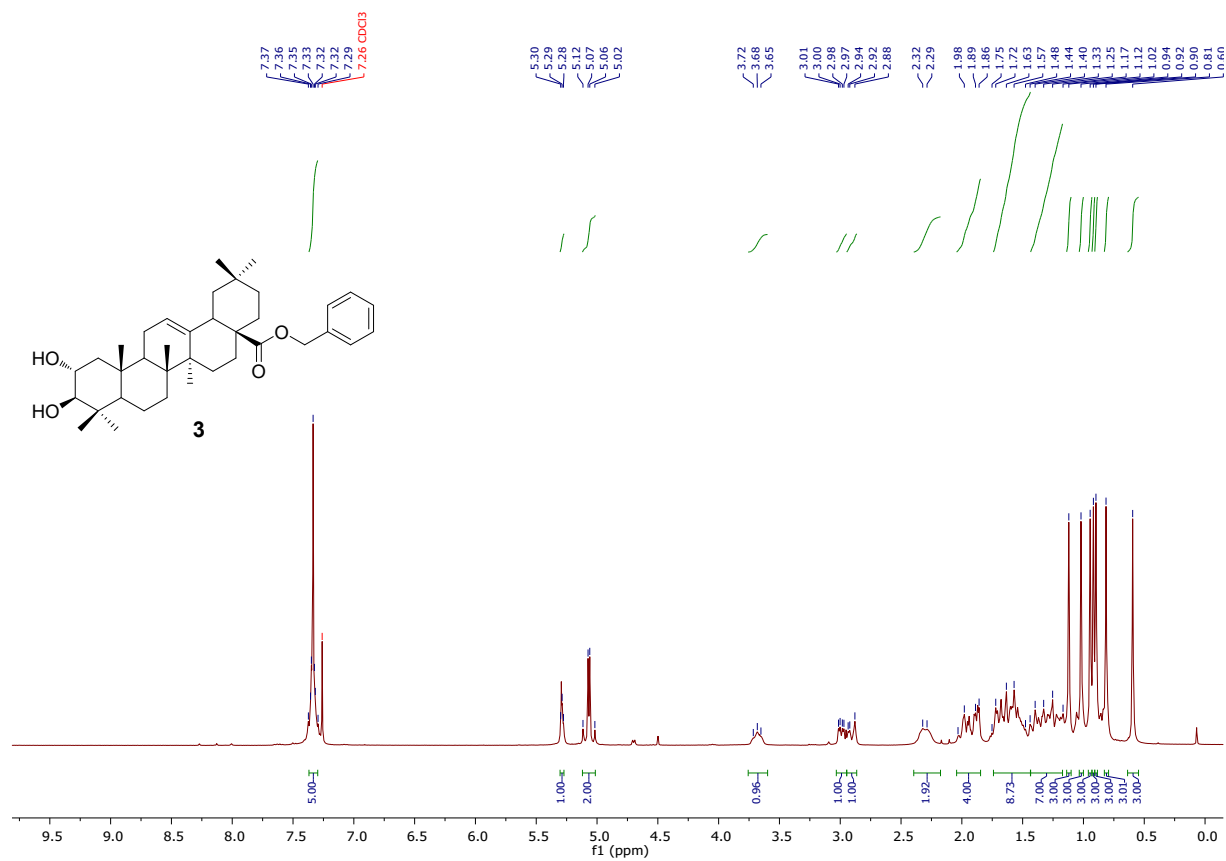

$^1\text{H}$  NMR (300 MHz,  $\text{CDCl}_3$ )

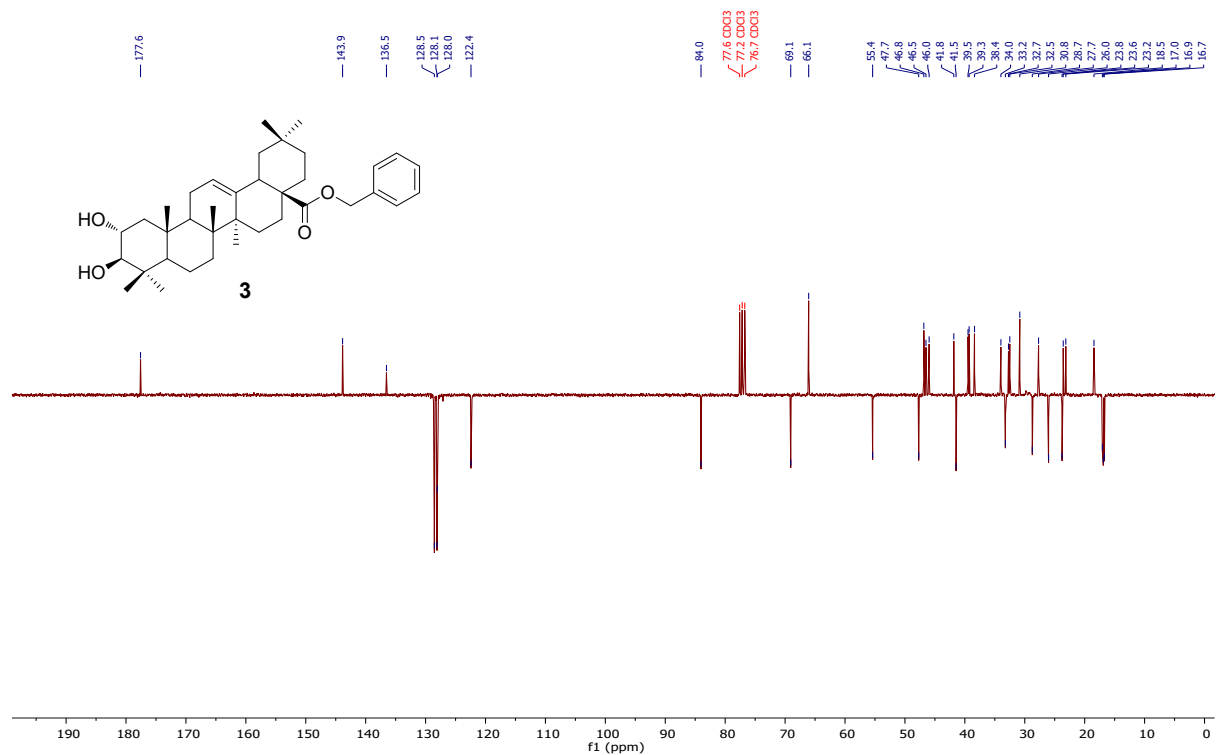

<sup>13</sup>C NMR (75 MHz, CDCl<sub>3</sub>)

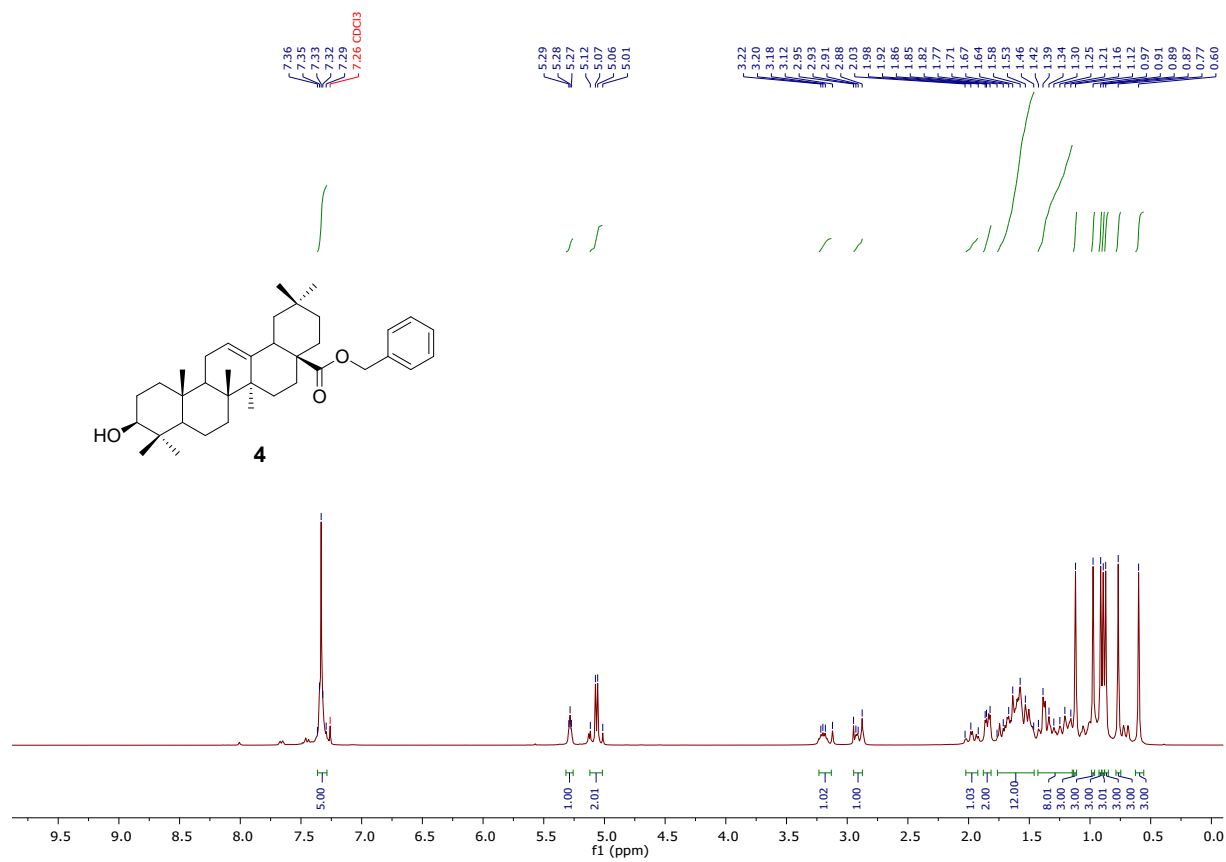

<sup>1</sup>H NMR (300 MHz, CDCl<sub>3</sub>)

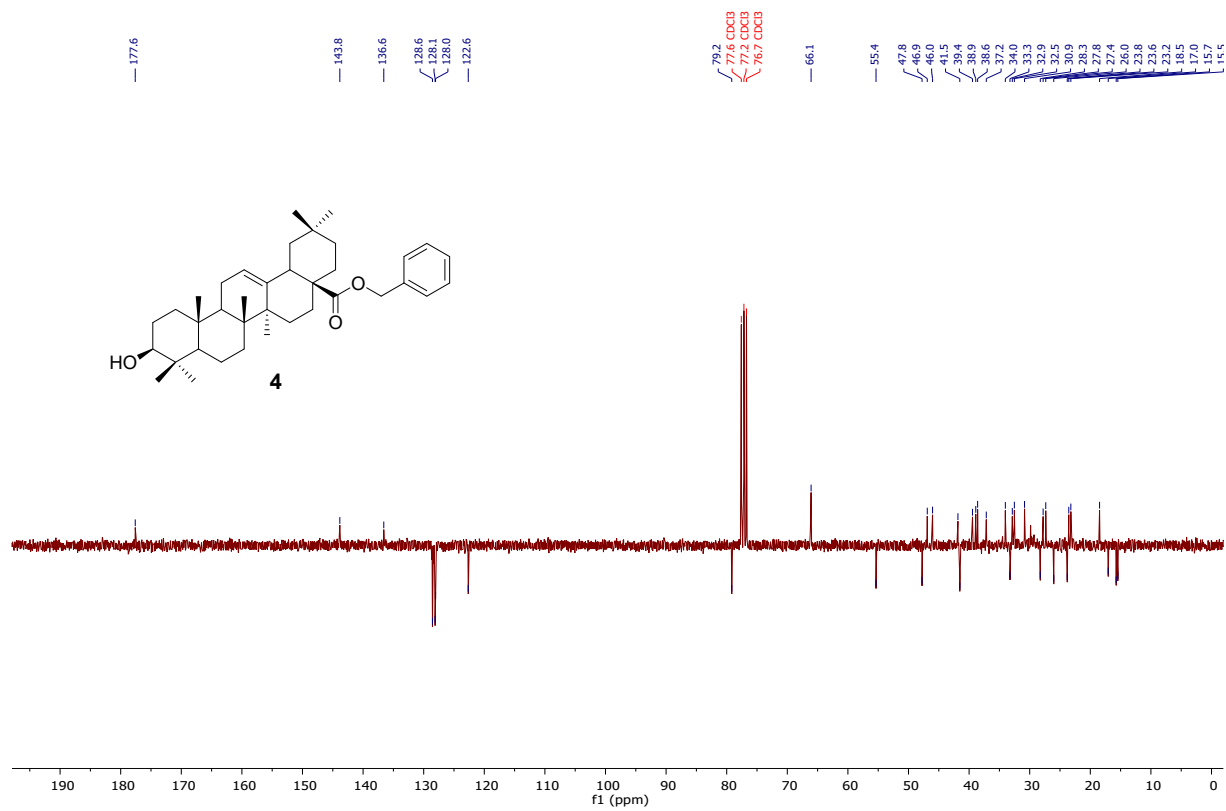

$^{13}\text{C}$  NMR (75 MHz,  $\text{CDCl}_3$ )

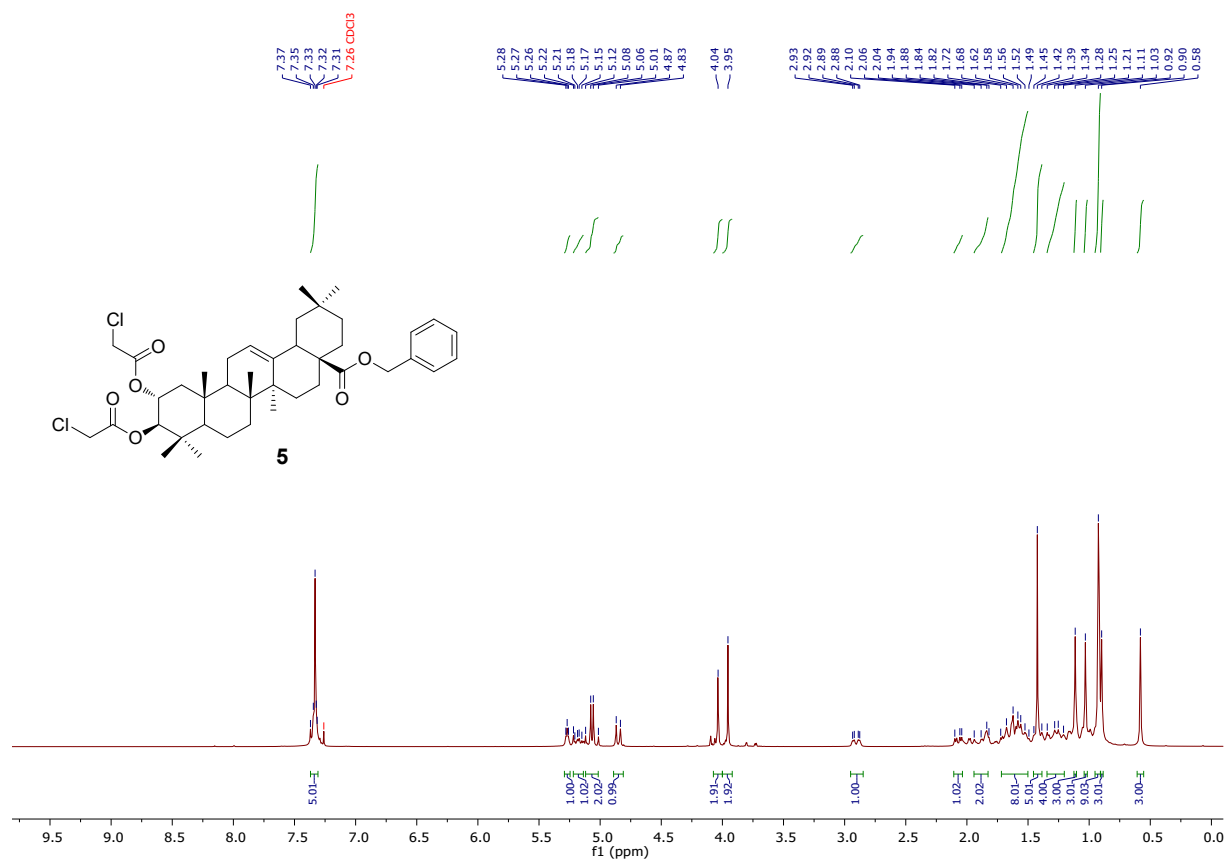

<sup>1</sup>H NMR (300 MHz, CDCl<sub>3</sub>)

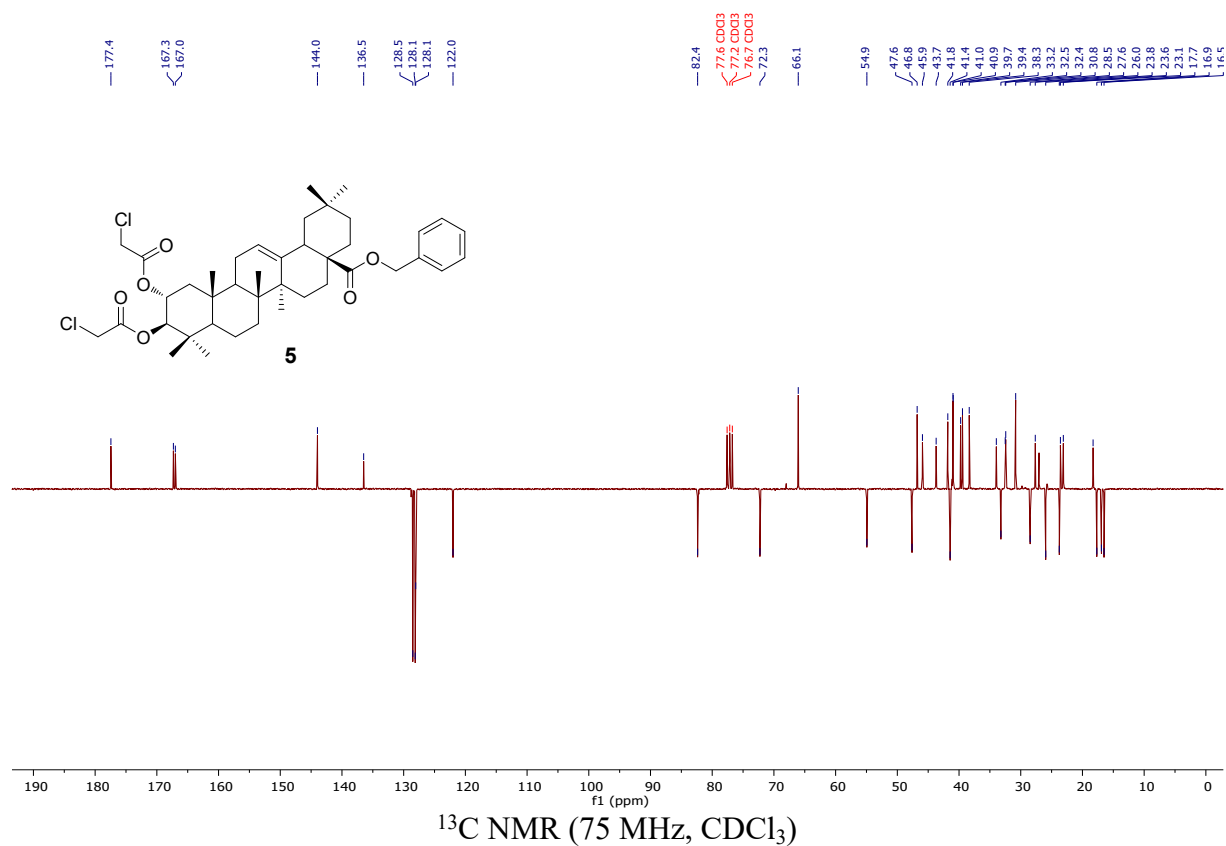

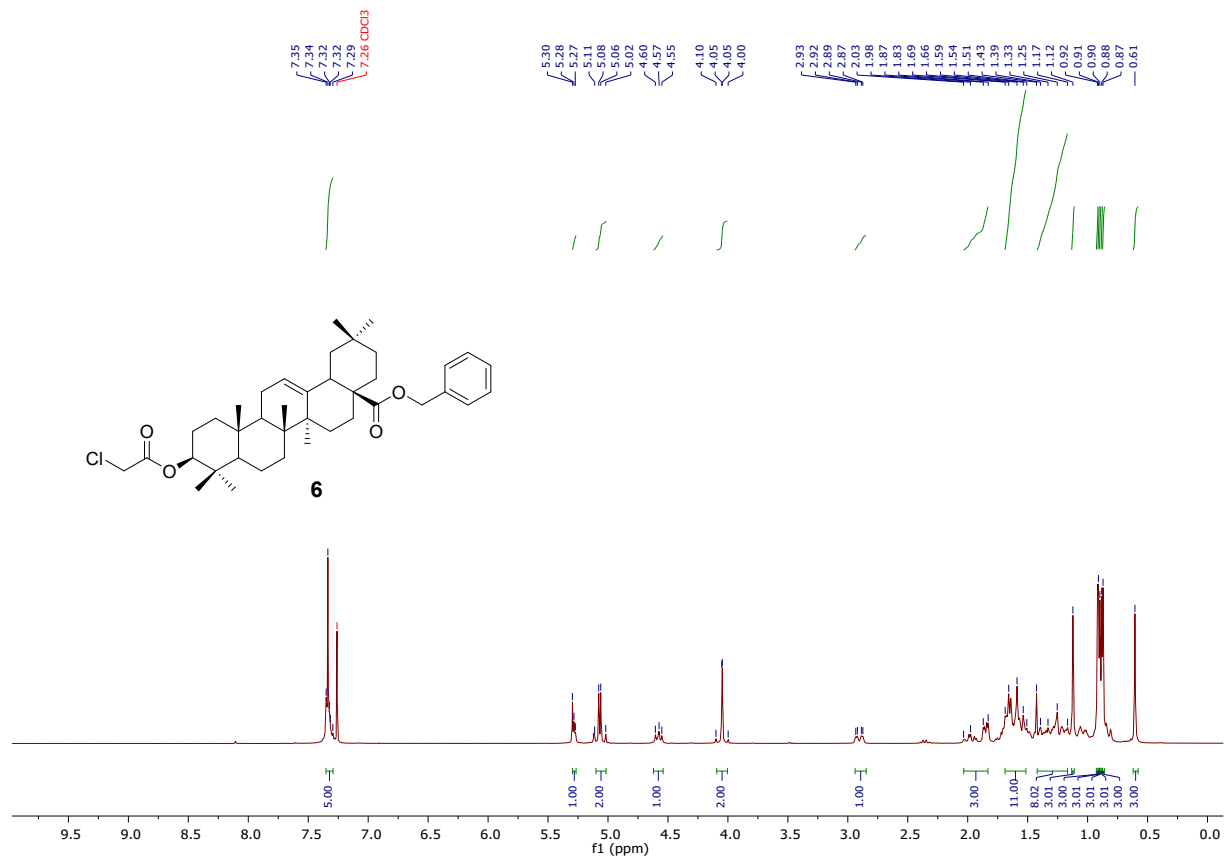

$^1\text{H NMR}$  (300 MHz,  $\text{CDCl}_3$ )

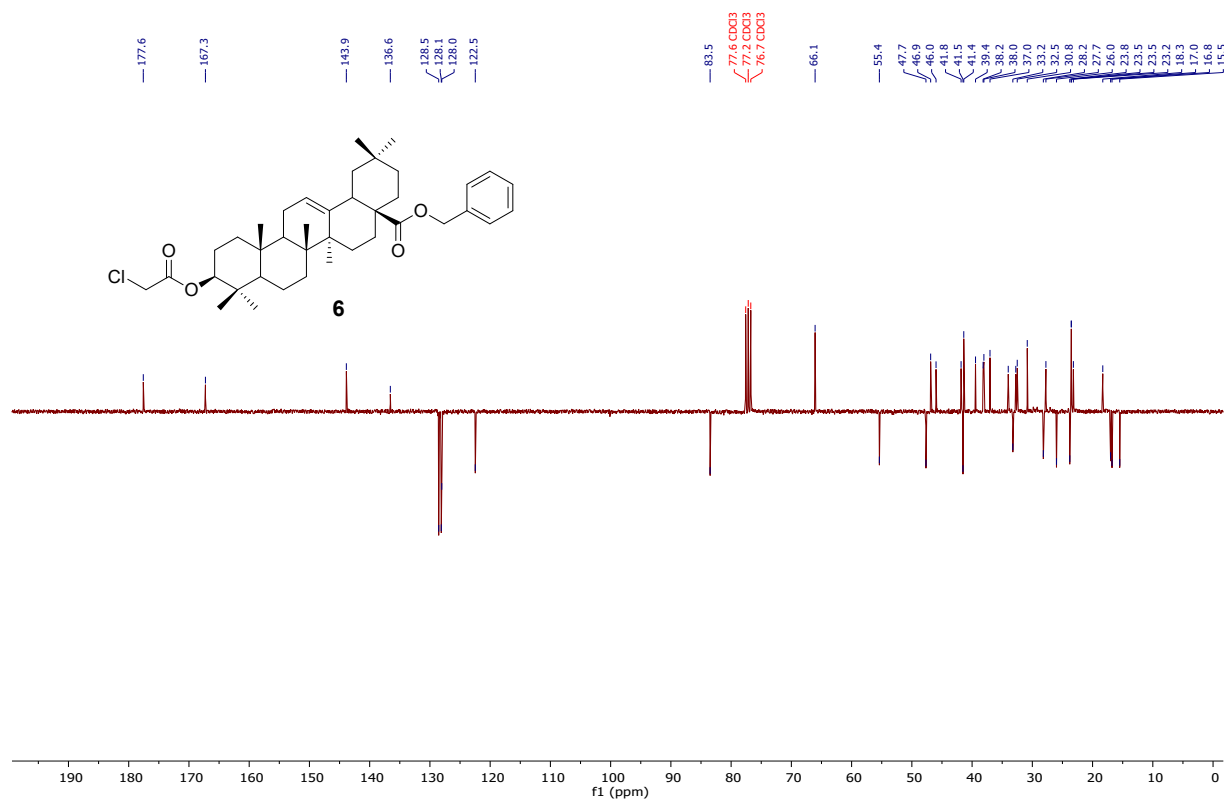

$^{13}\text{C}$  NMR (75 MHz,  $\text{CDCl}_3$ )

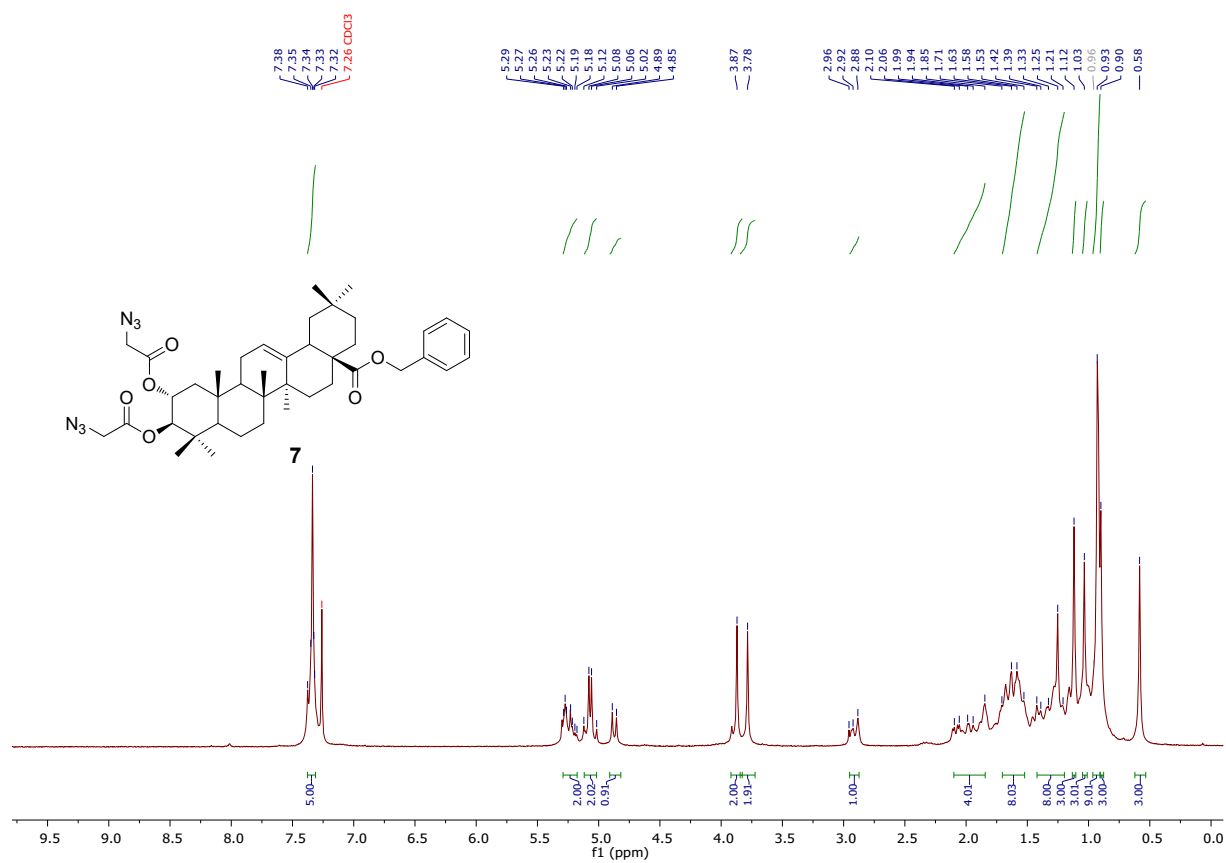

$^1\text{H}$  NMR (300 MHz,  $\text{CDCl}_3$ )





# $^1\text{H}$ NMR (300 MHz, $\text{CDCl}_3$ )

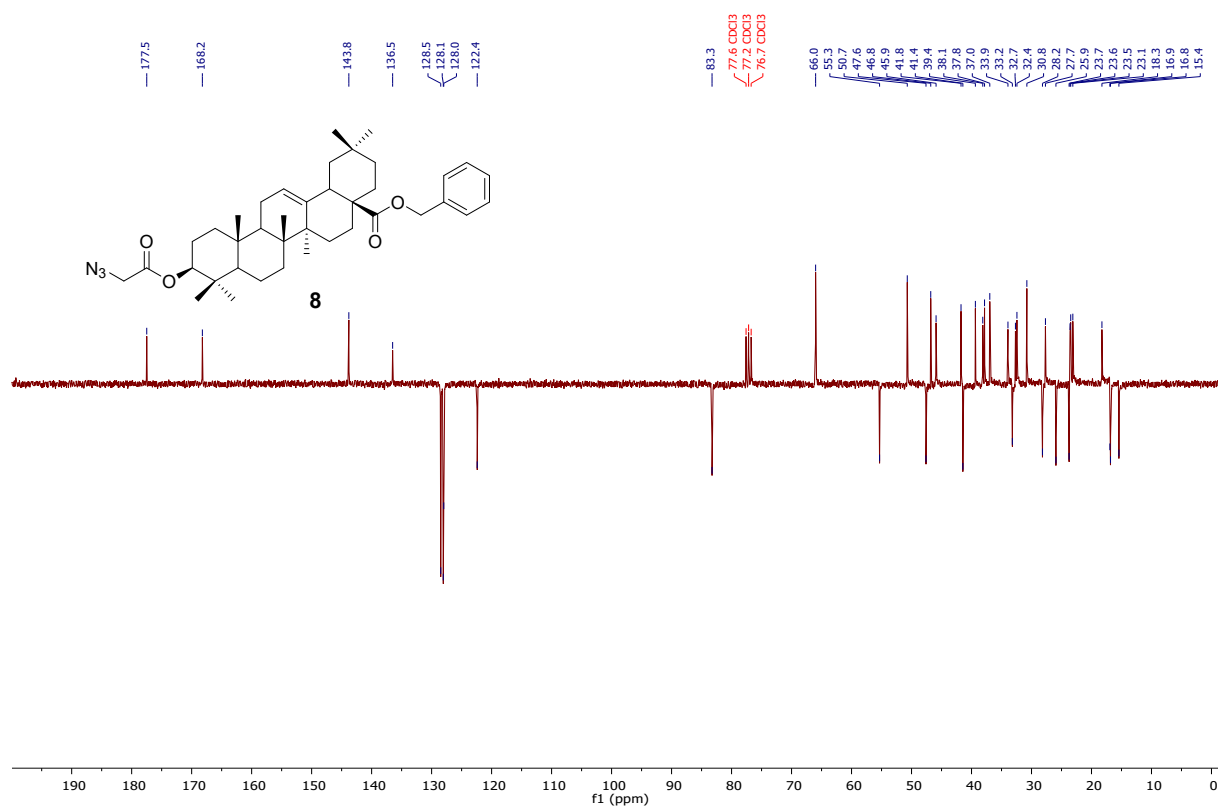

# $^{13}\text{C}$ NMR (75 MHz, $\text{CDCl}_3$ )

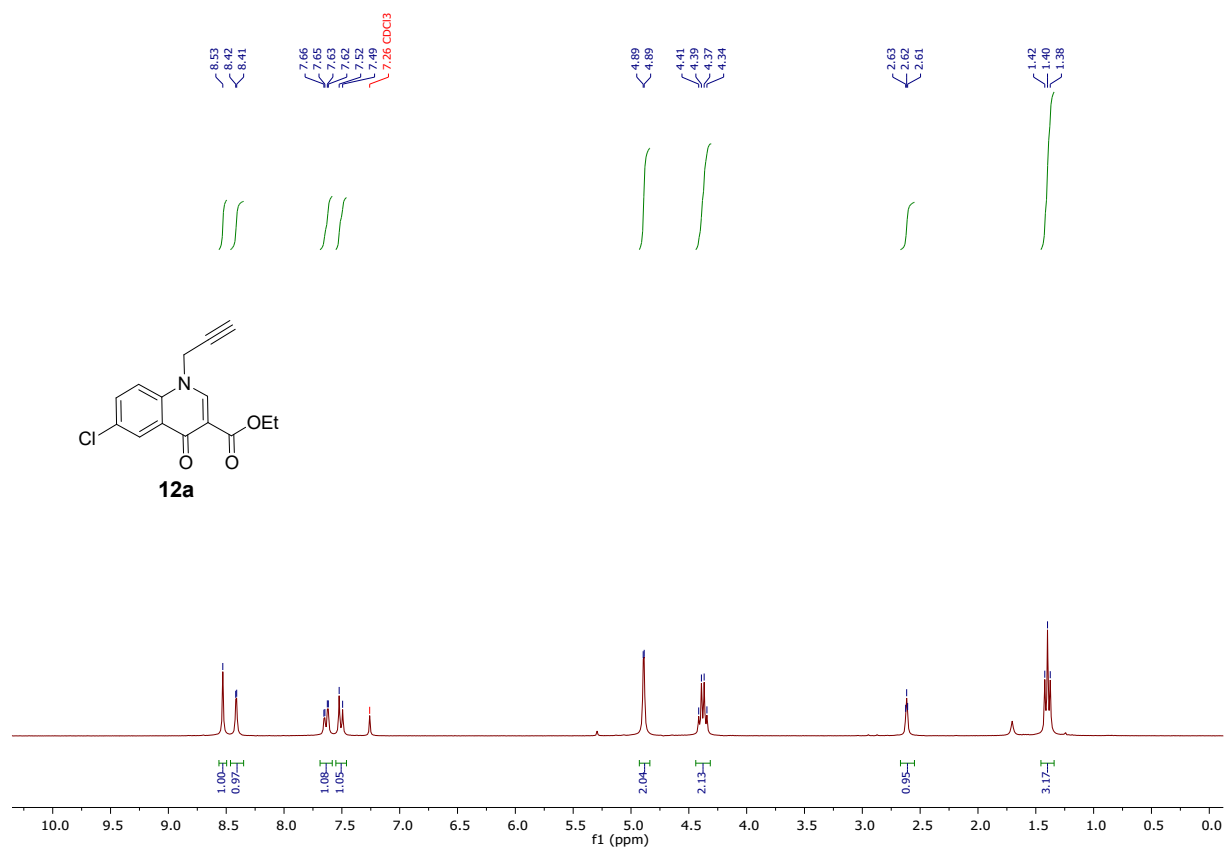

<sup>1</sup>H NMR (300 MHz, CDCl<sub>3</sub>)

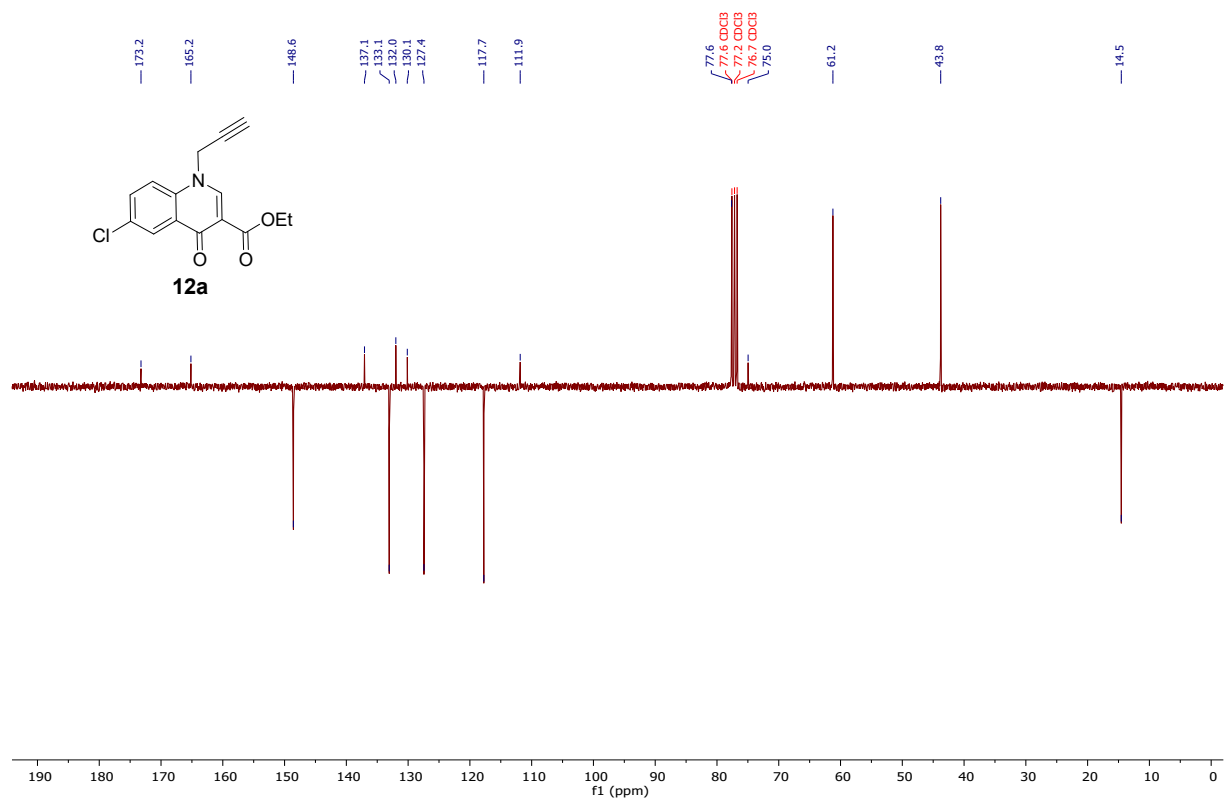

$^{13}\text{C}$  NMR (75 MHz,  $\text{CDCl}_3$ )

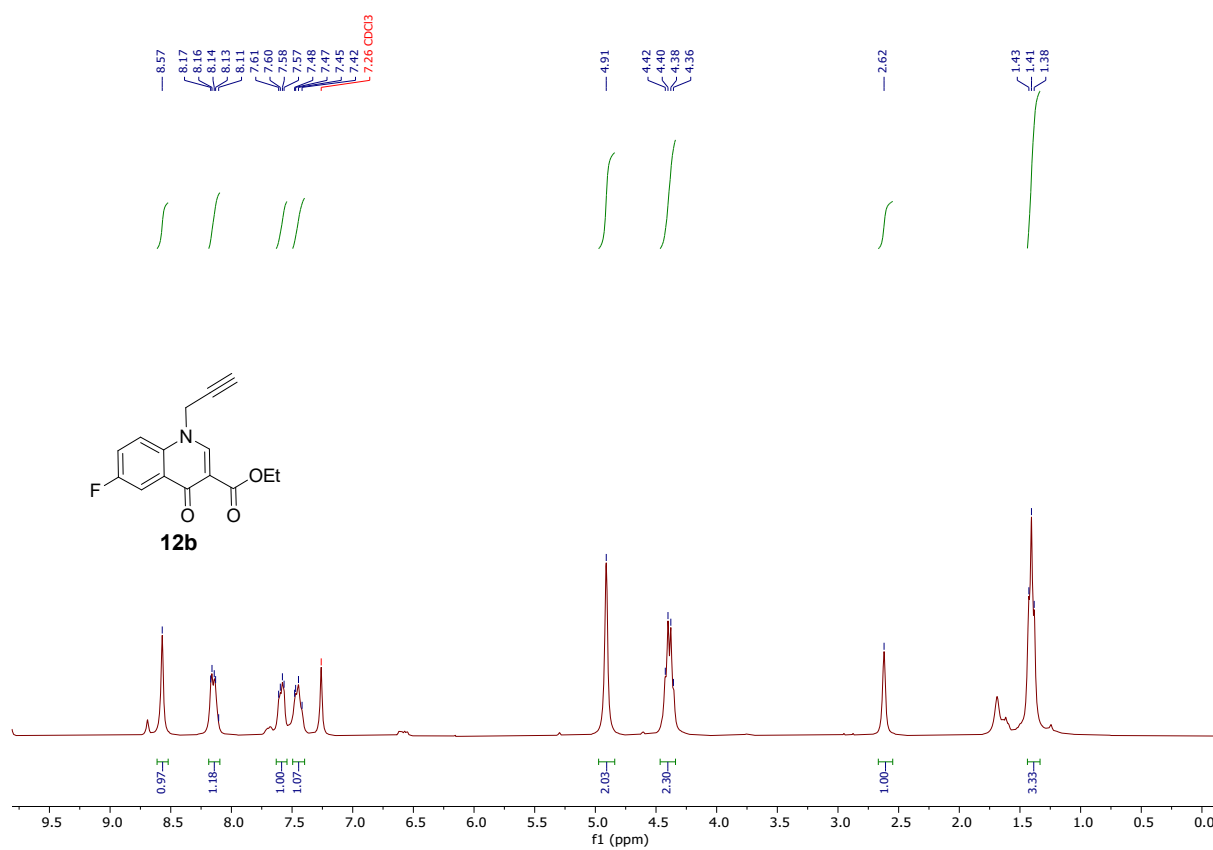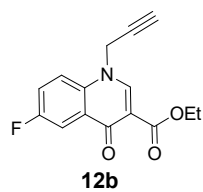

$^1\text{H}$  NMR (300 MHz,  $\text{CDCl}_3$ )

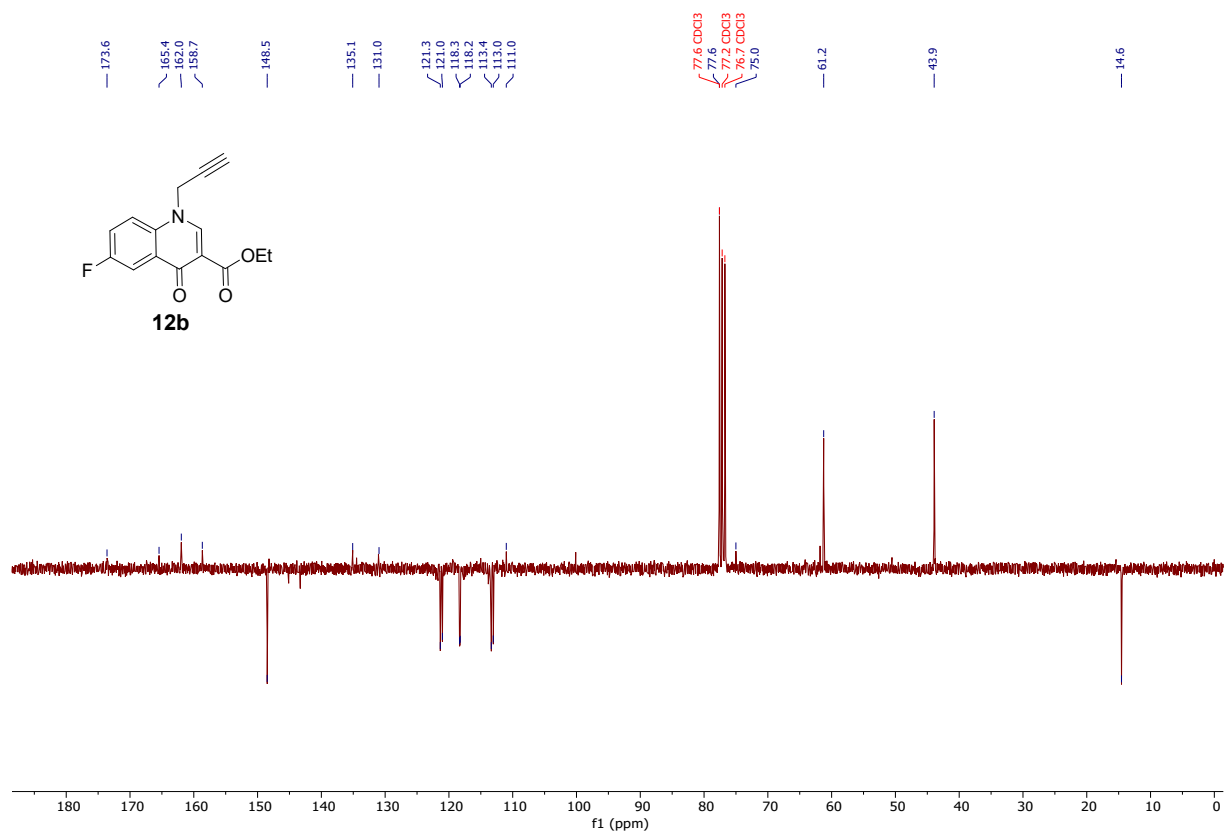

$^{13}\text{C}$  NMR (75 MHz,  $\text{CDCl}_3$ )

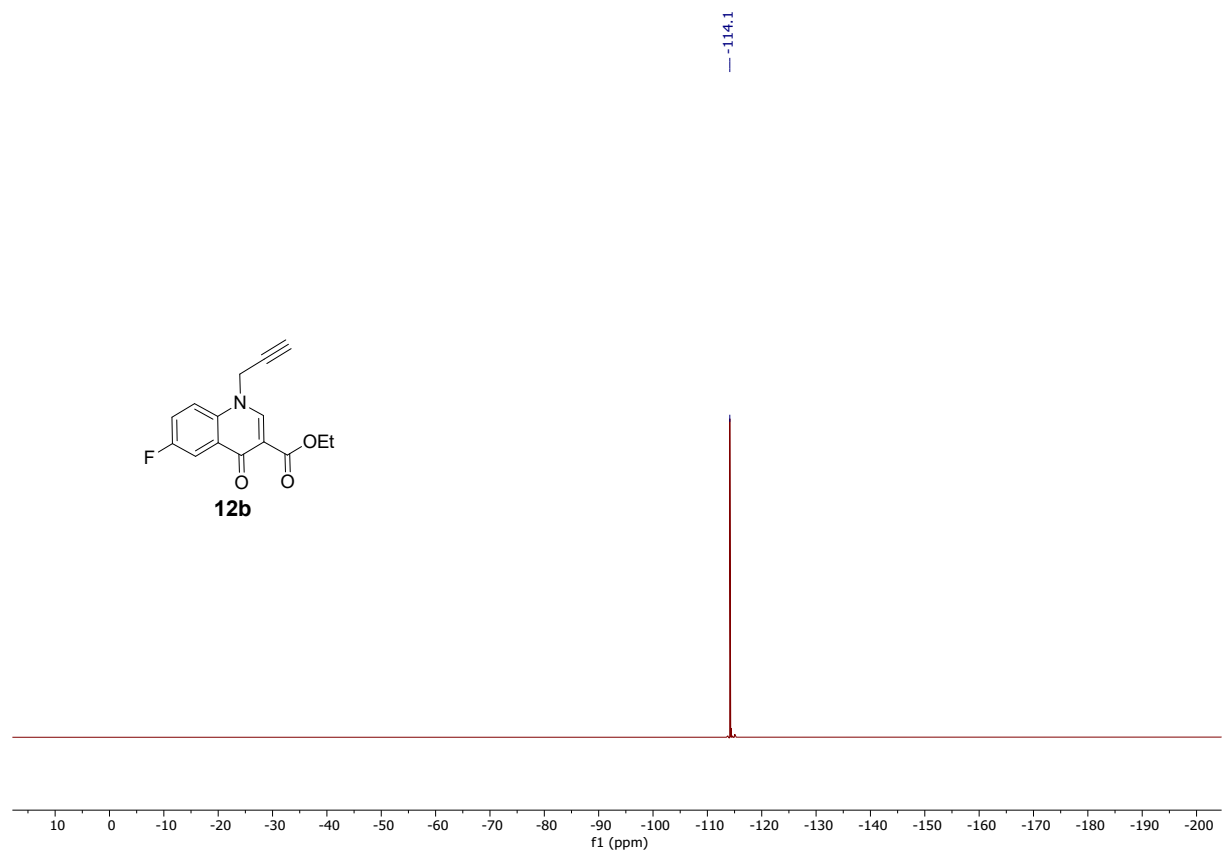

$^{19}\text{F}$  NMR (282 MHz,  $\text{CDCl}_3$ )

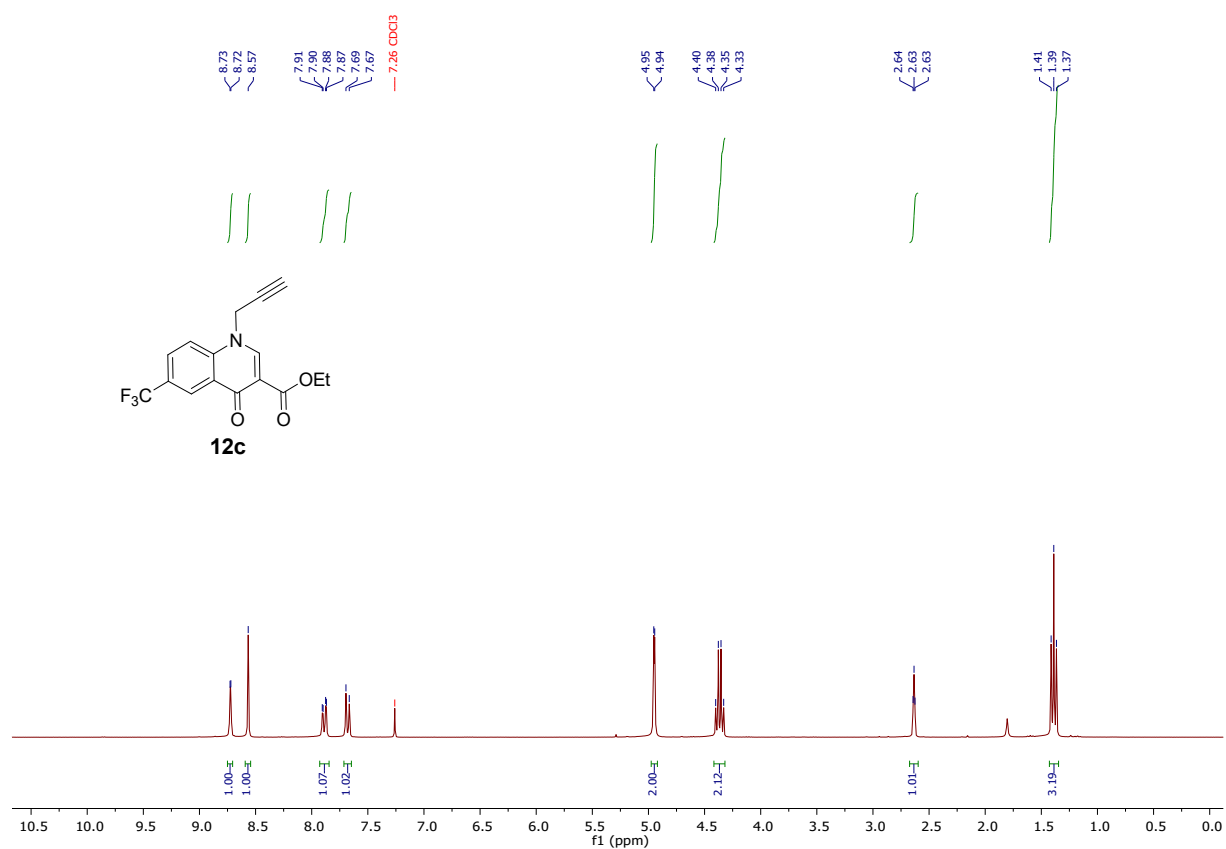

$^1\text{H}$  NMR (300 MHz,  $\text{CDCl}_3$ )

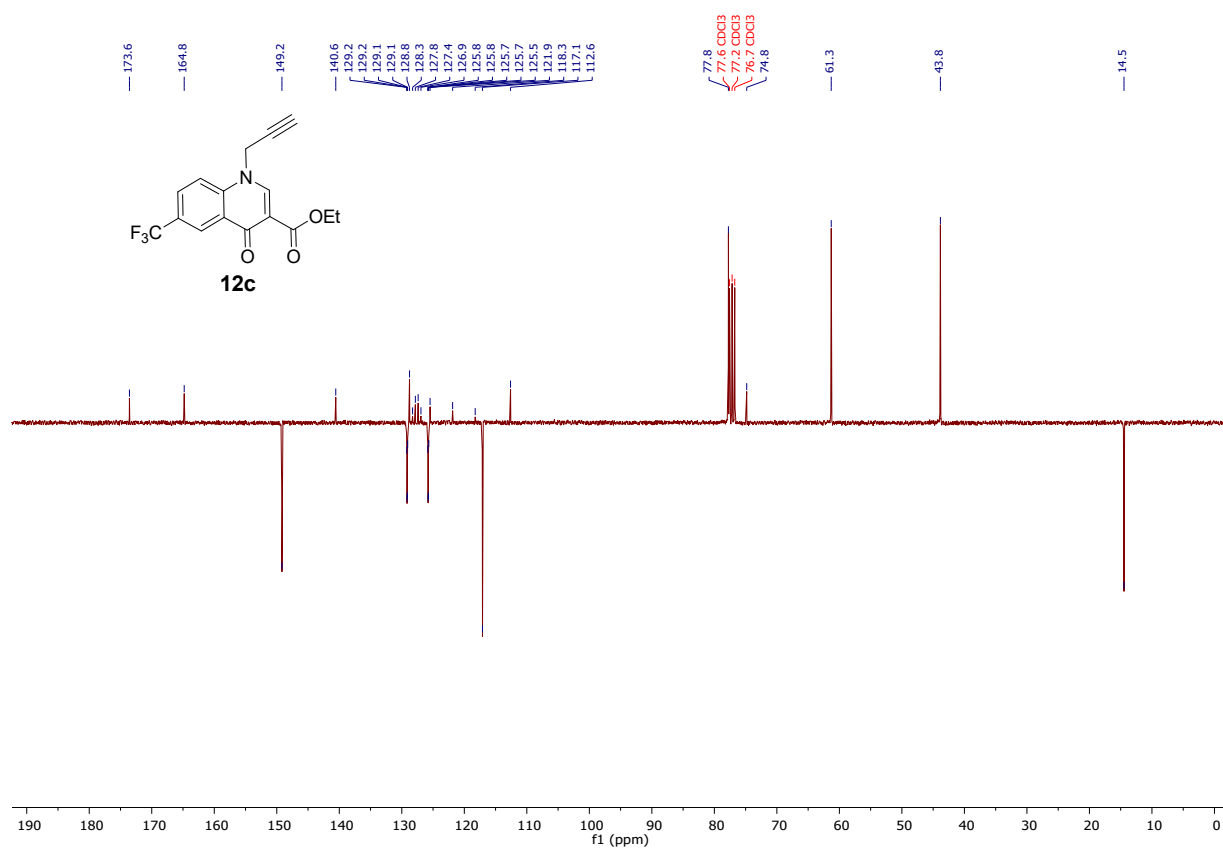

<sup>13</sup>C NMR (75 MHz, CDCl<sub>3</sub>)

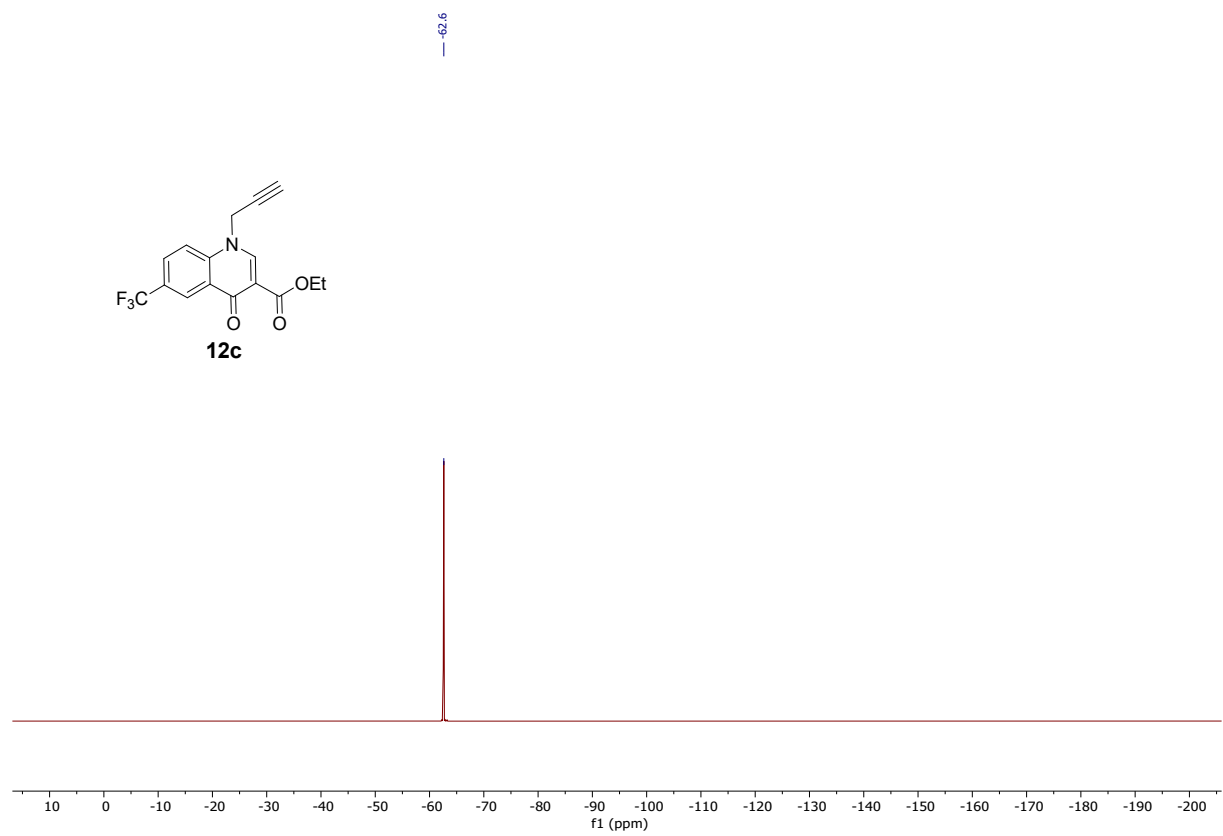

<sup>19</sup>F NMR (282 MHz, CDCl<sub>3</sub>)

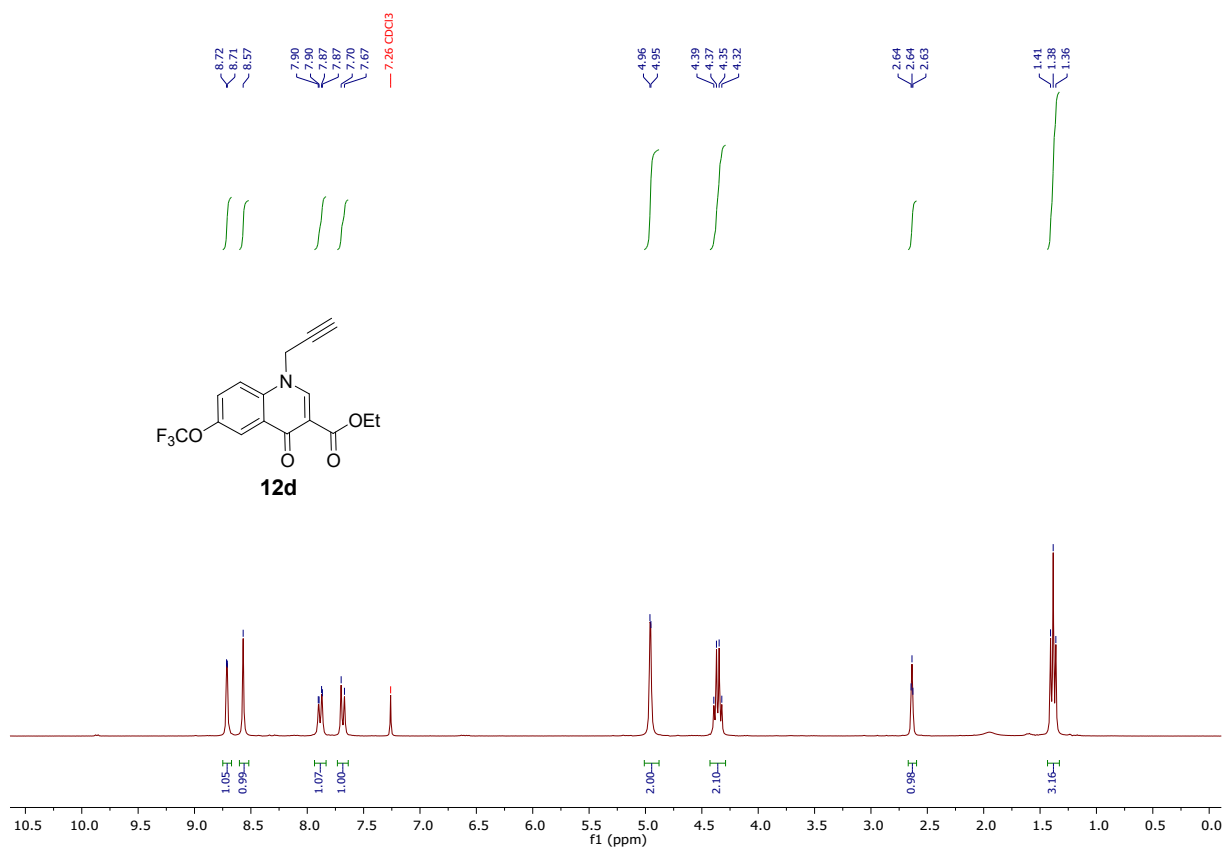

**1H NMR (300 MHz, CDCl<sub>3</sub>)**

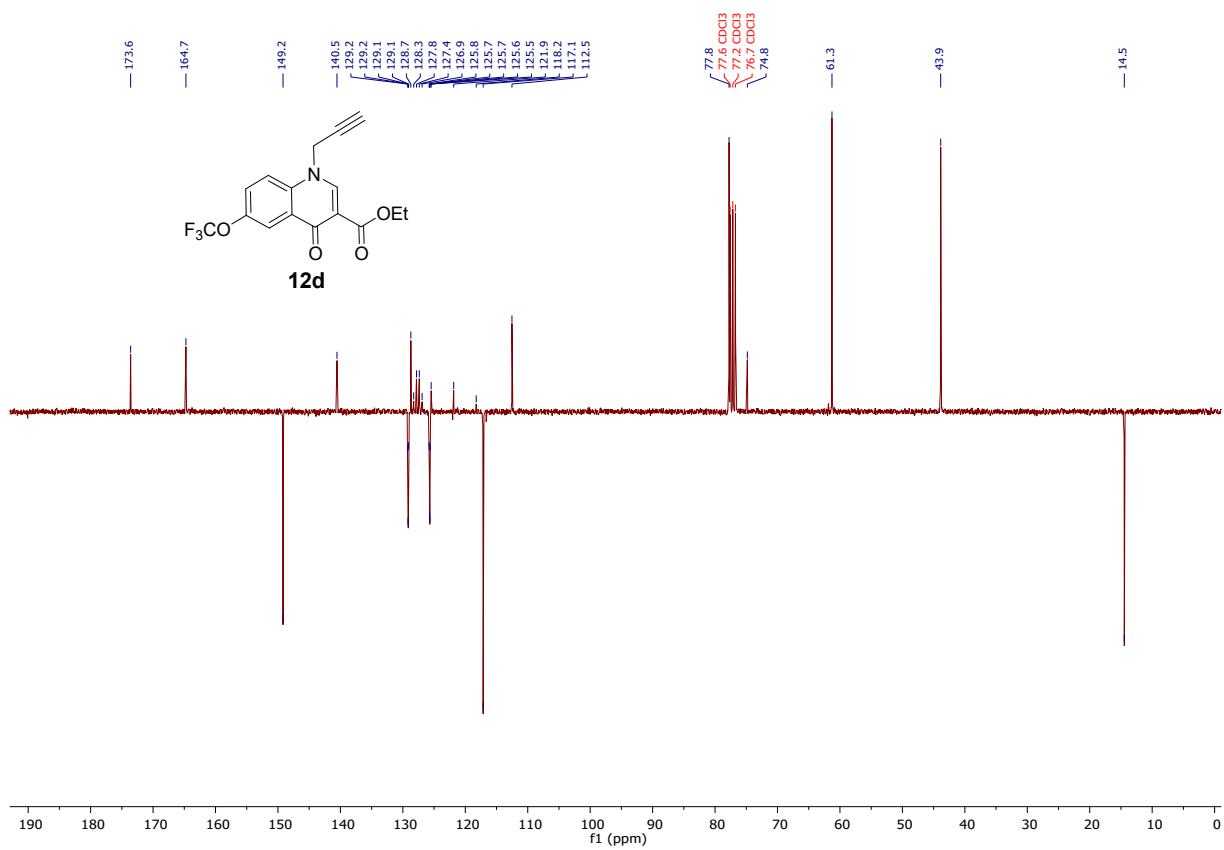



$^{13}\text{C}$  NMR (75 MHz,  $\text{CDCl}_3$ )

—62.3

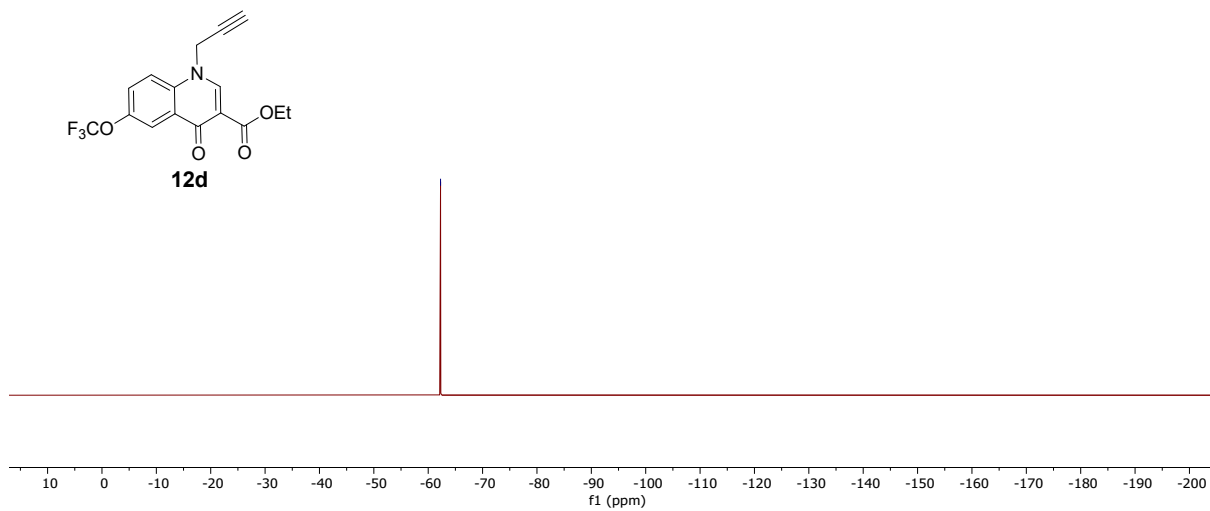

$^{19}\text{F}$  NMR (282 MHz,  $\text{CDCl}_3$ )

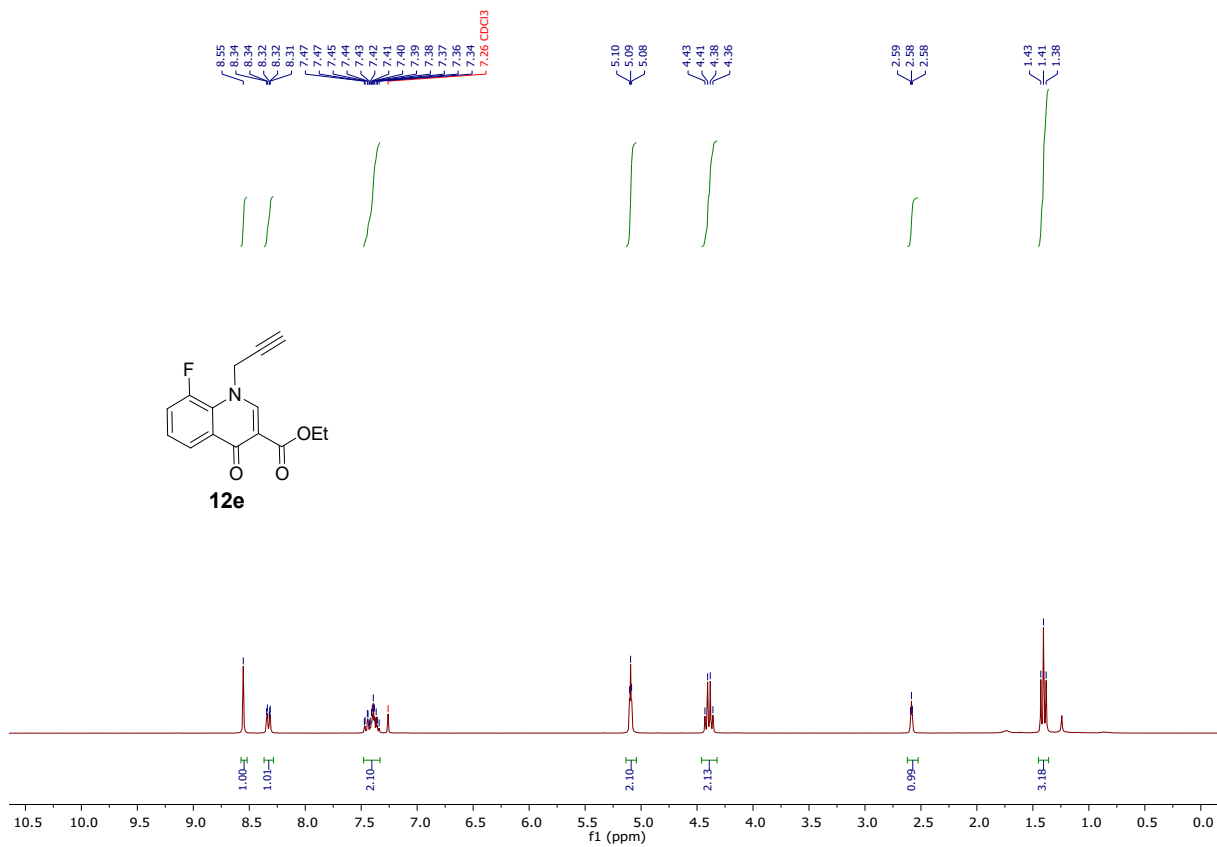

**<sup>1</sup>H NMR (300 MHz, CDCl<sub>3</sub>)**

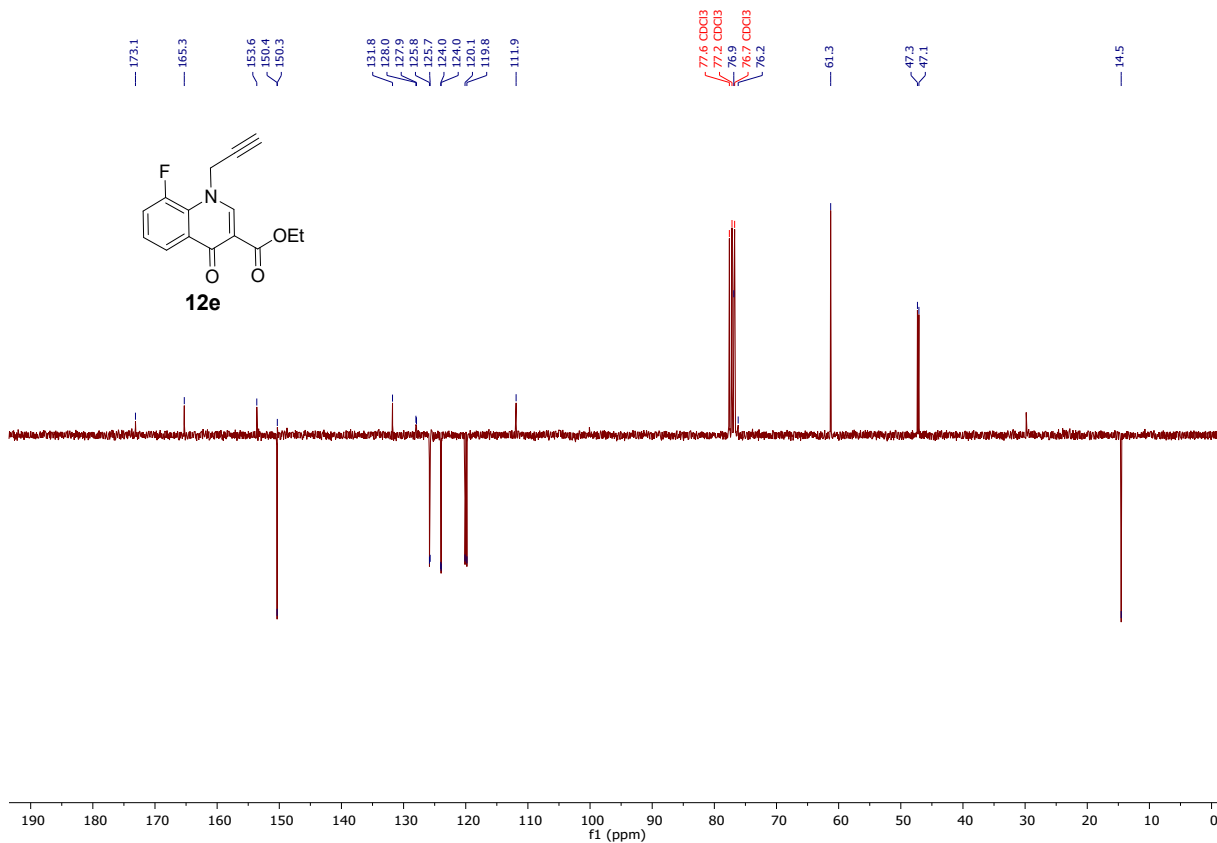

$^{13}\text{C}$  NMR (75 MHz,  $\text{CDCl}_3$ )

-122.0

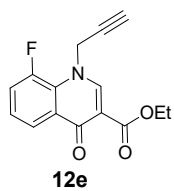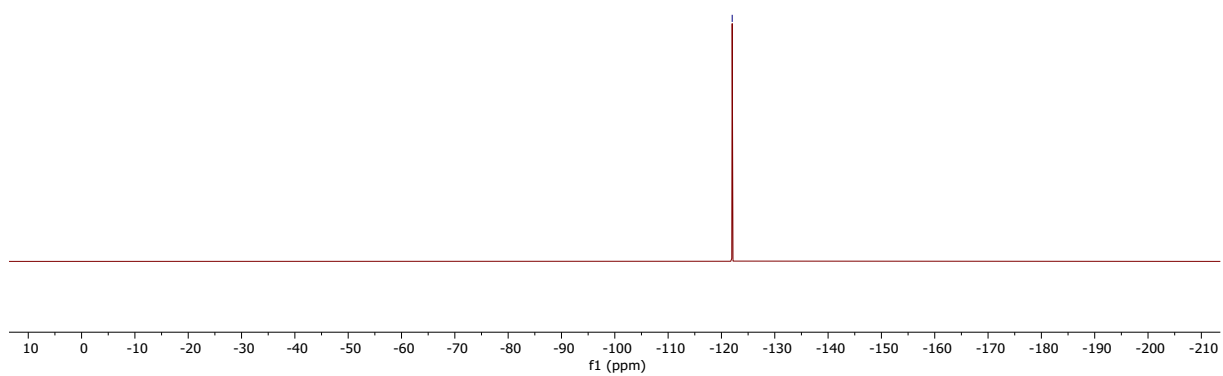

$^{19}\text{F}$  NMR (282 MHz,  $\text{CDCl}_3$ )

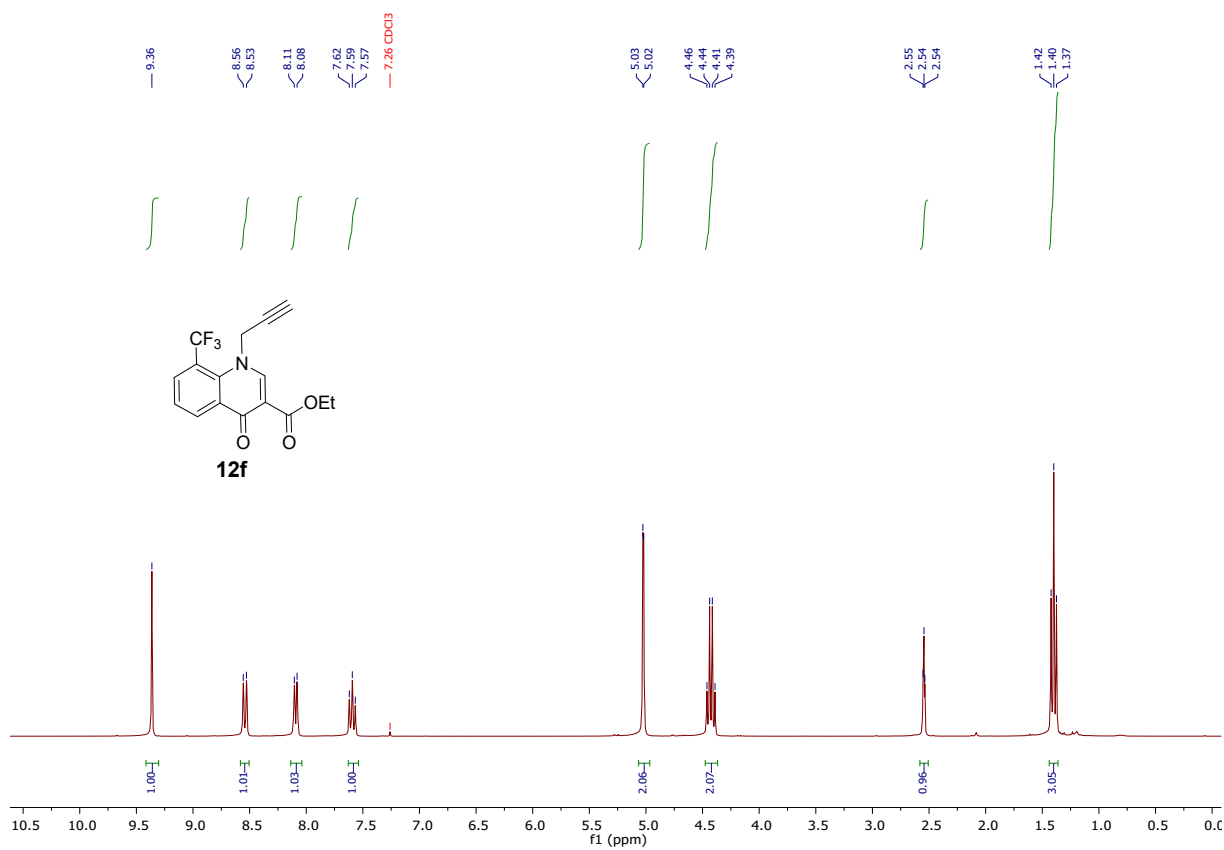

<sup>1</sup>H NMR (300 MHz, CDCl<sub>3</sub>)

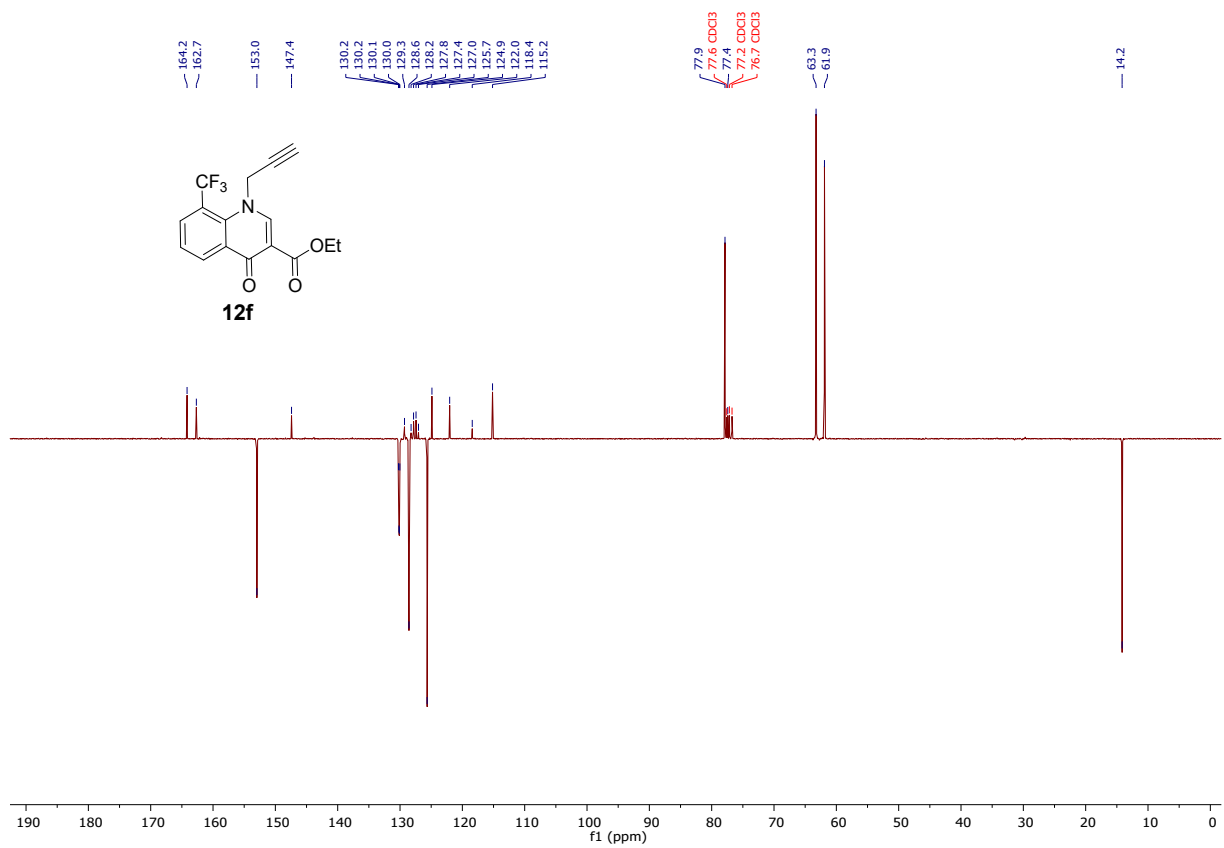

$^{13}\text{C}$  NMR (75 MHz,  $\text{CDCl}_3$ )

-60.2

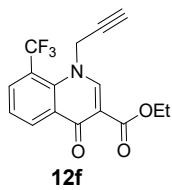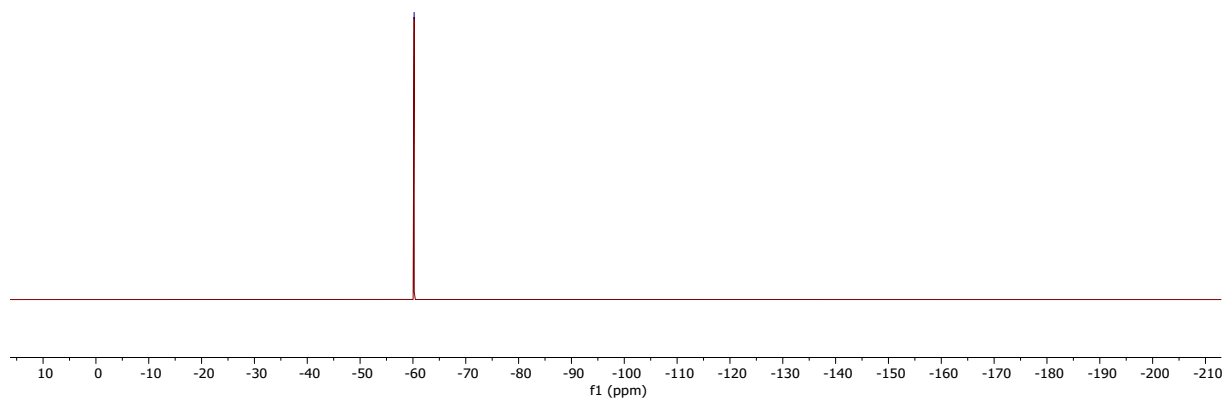

$^{19}\text{F}$  NMR (282 MHz,  $\text{CDCl}_3$ )

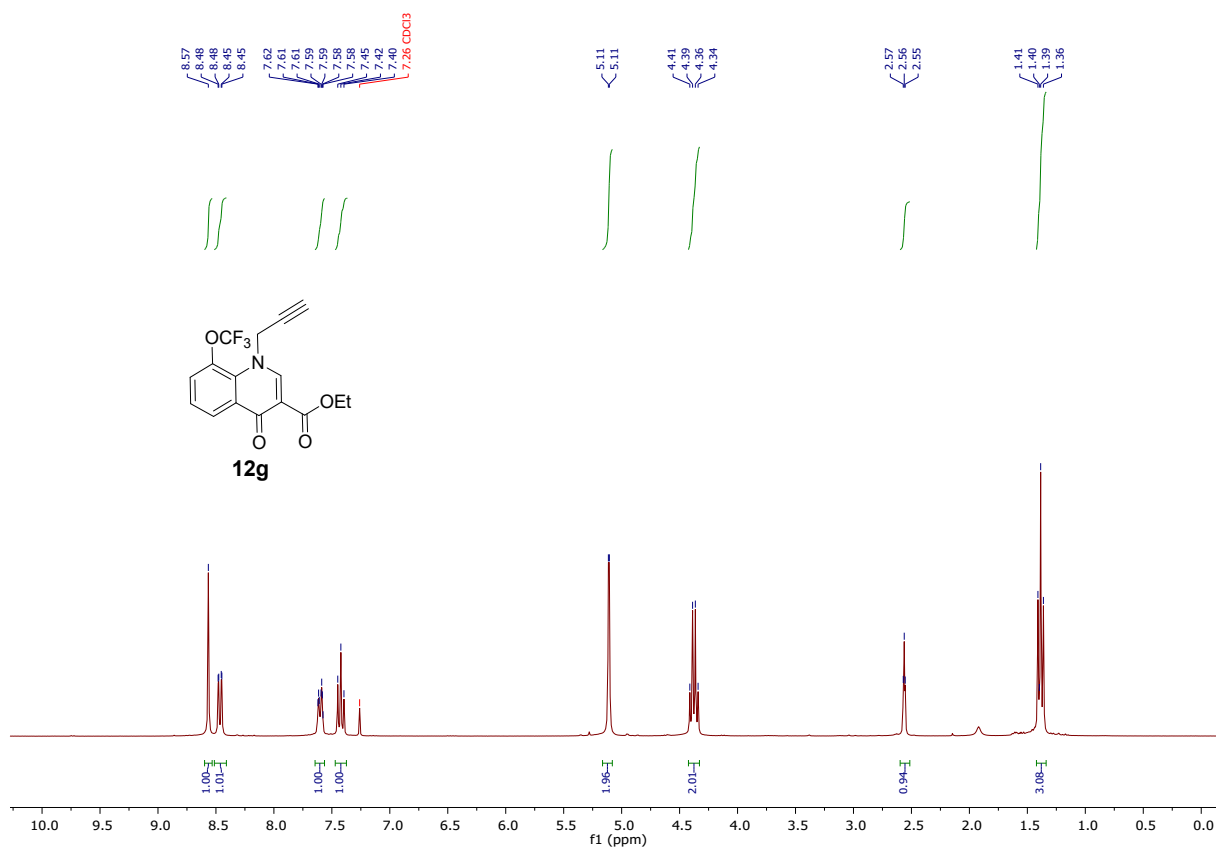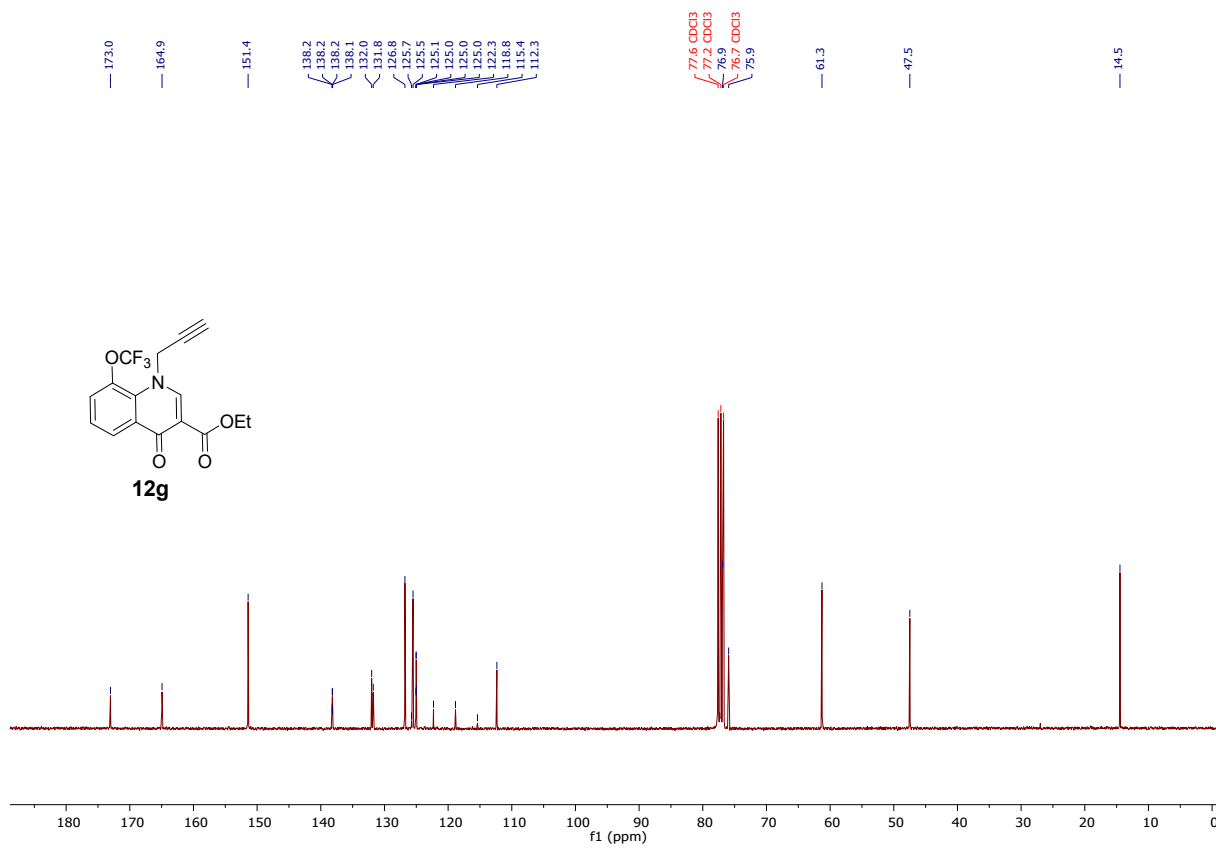

$^{13}\text{C}$  NMR (75 MHz,  $\text{CDCl}_3$ )

— 62.3

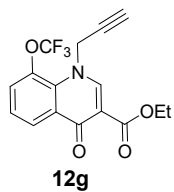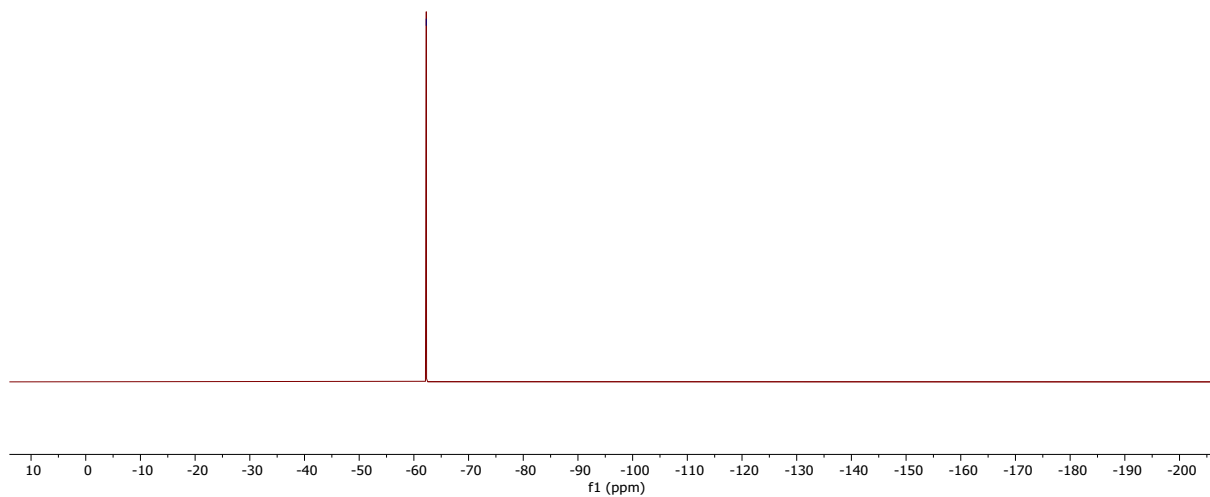

$^{19}\text{F}$  NMR (282 MHz,  $\text{CDCl}_3$ )

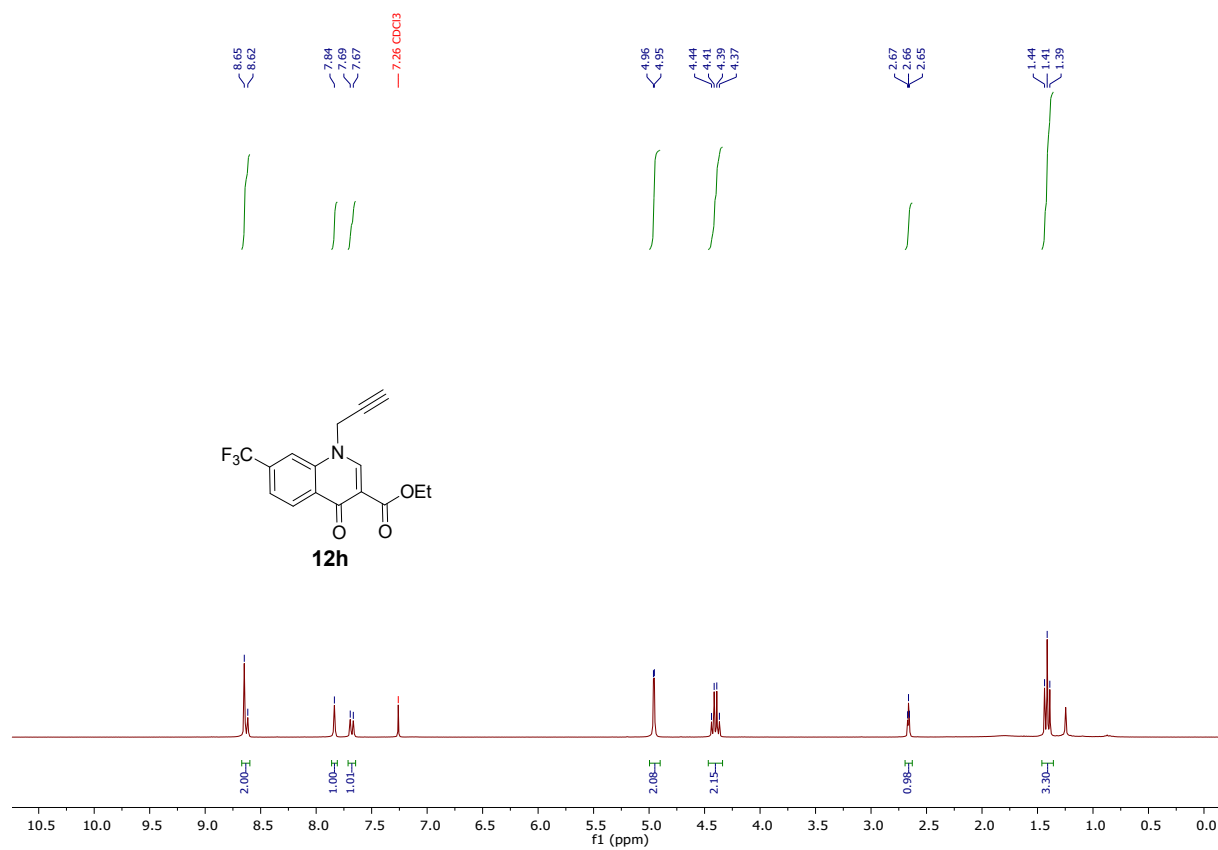

$^1\text{H}$  NMR (300 MHz,  $\text{CDCl}_3$ )

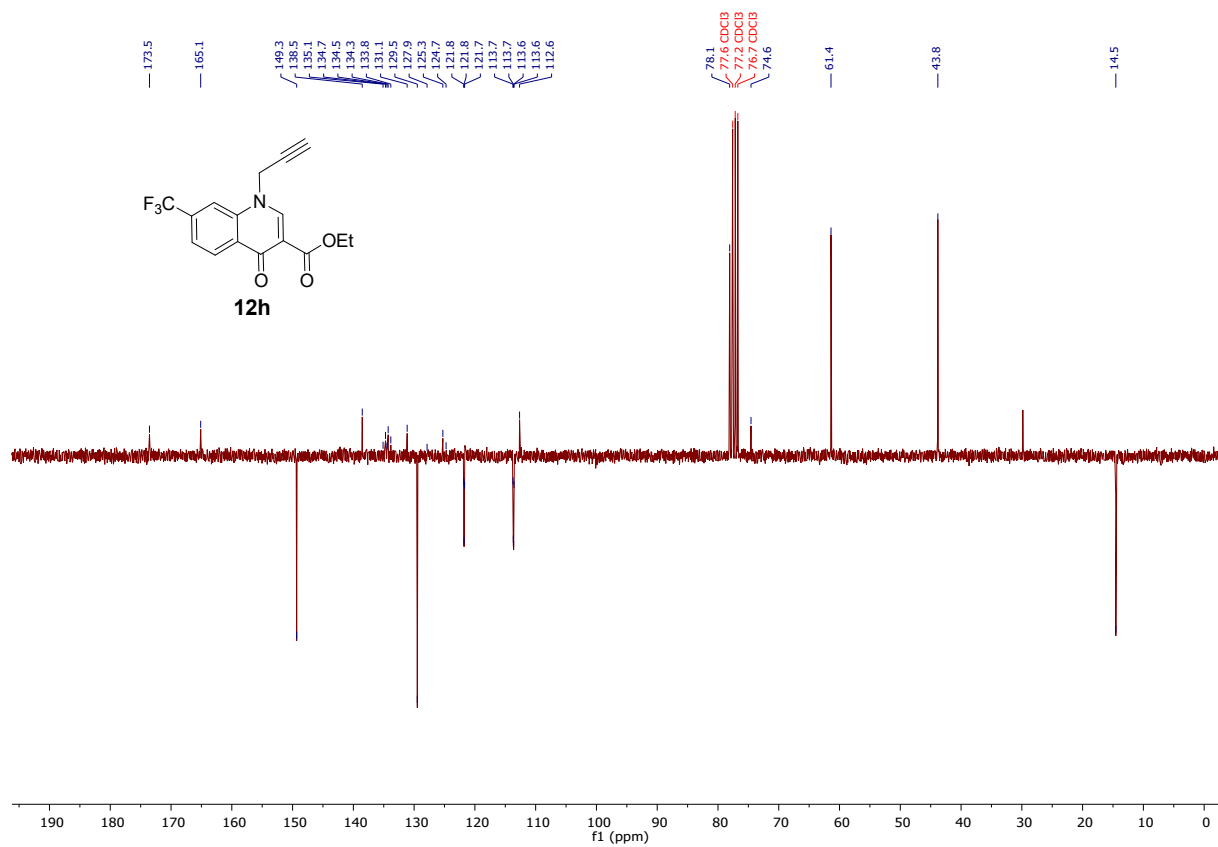



$^{13}\text{C}$  NMR (75 MHz,  $\text{CDCl}_3$ )

— 62.6

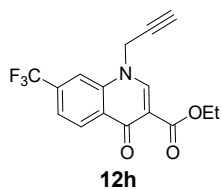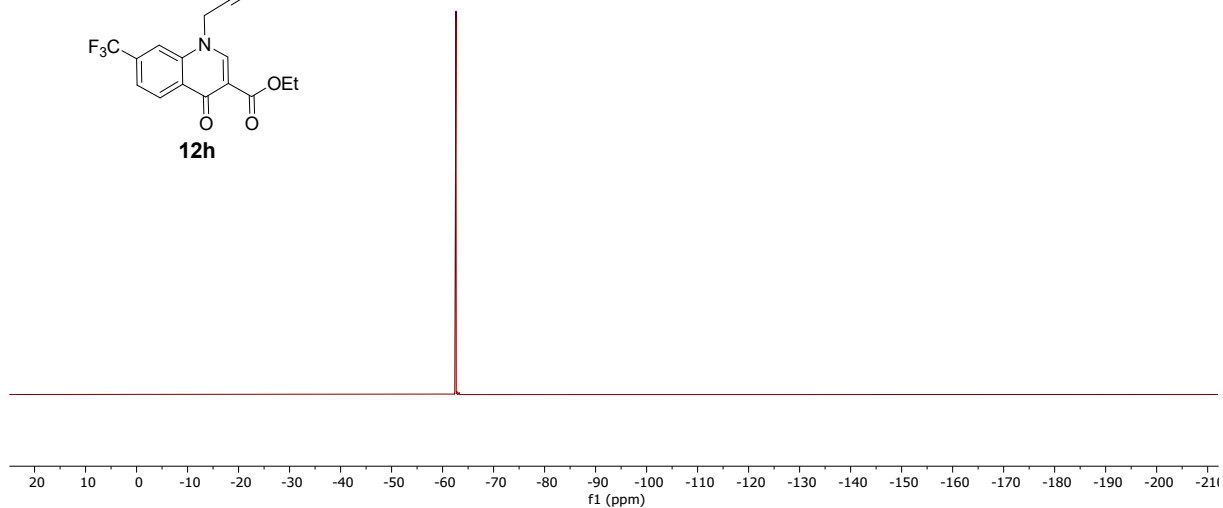

$^{19}\text{F}$  NMR (282 MHz,  $\text{CDCl}_3$ )

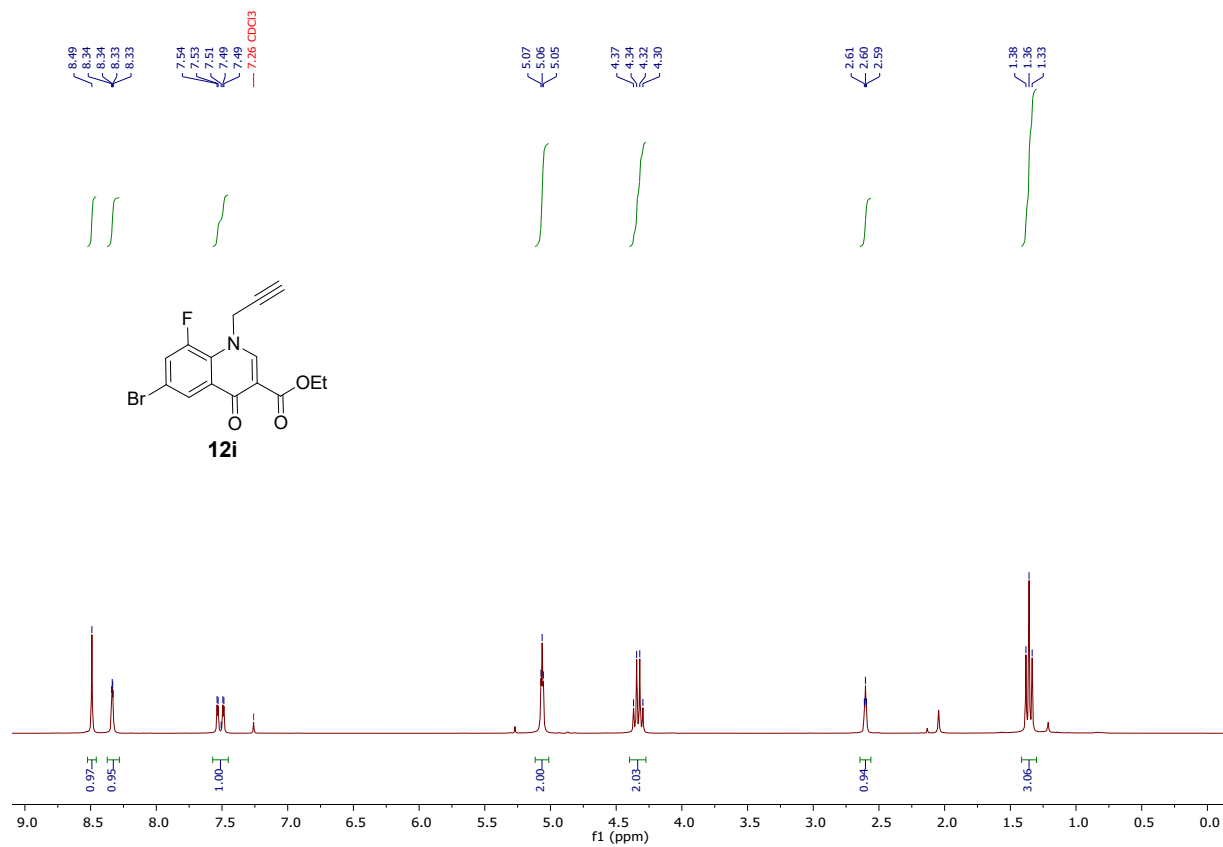

**<sup>1</sup>H NMR (300 MHz, CDCl<sub>3</sub>)**

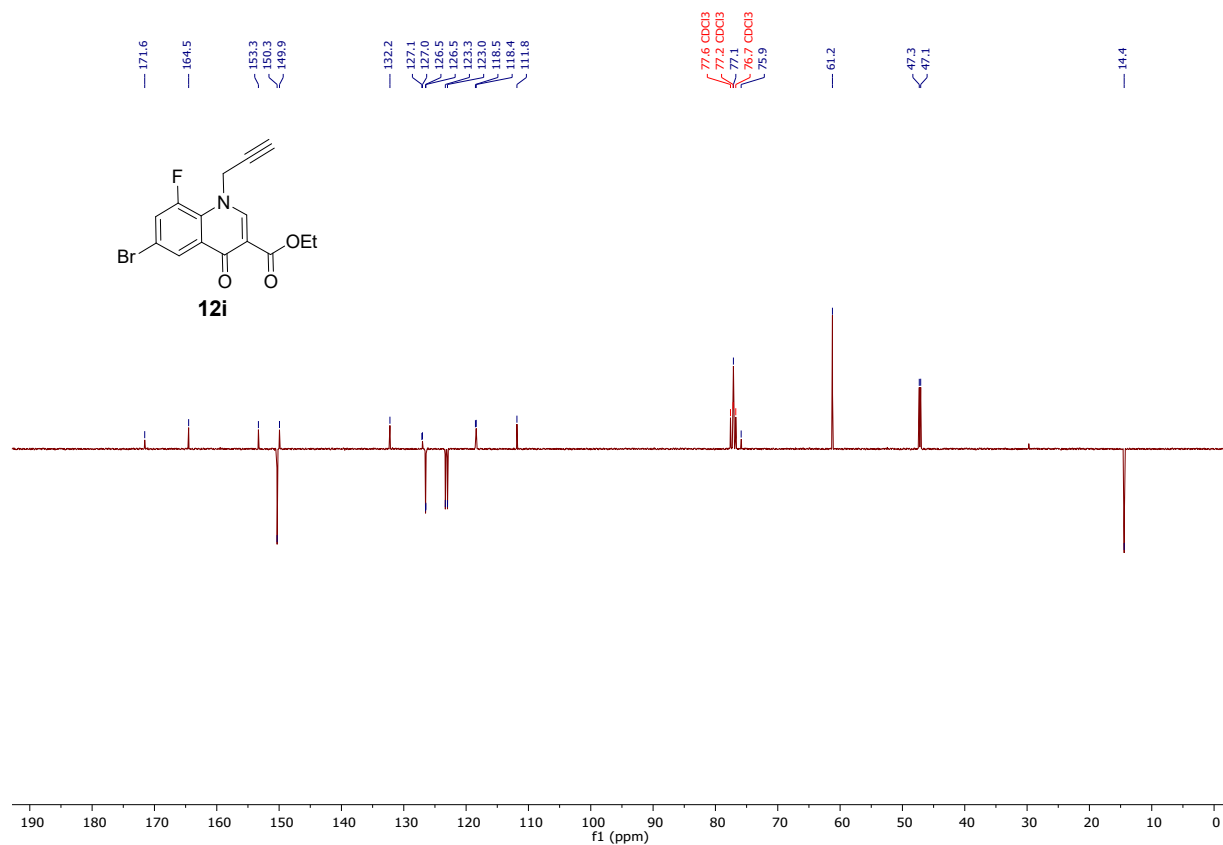

$^{13}\text{C}$  NMR (75 MHz,  $\text{CDCl}_3$ )

-111.5

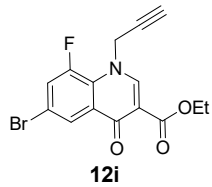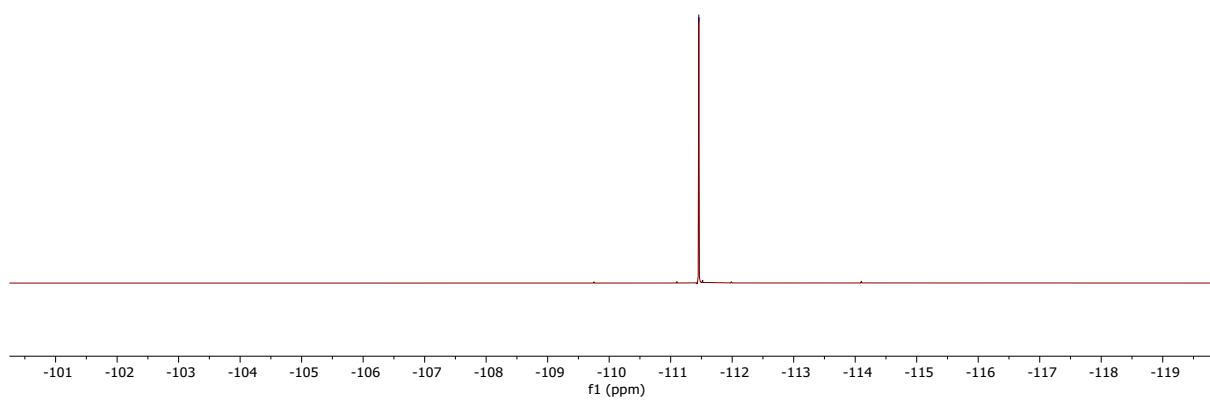

$^{19}\text{F}$  NMR (282 MHz,  $\text{CDCl}_3$ )

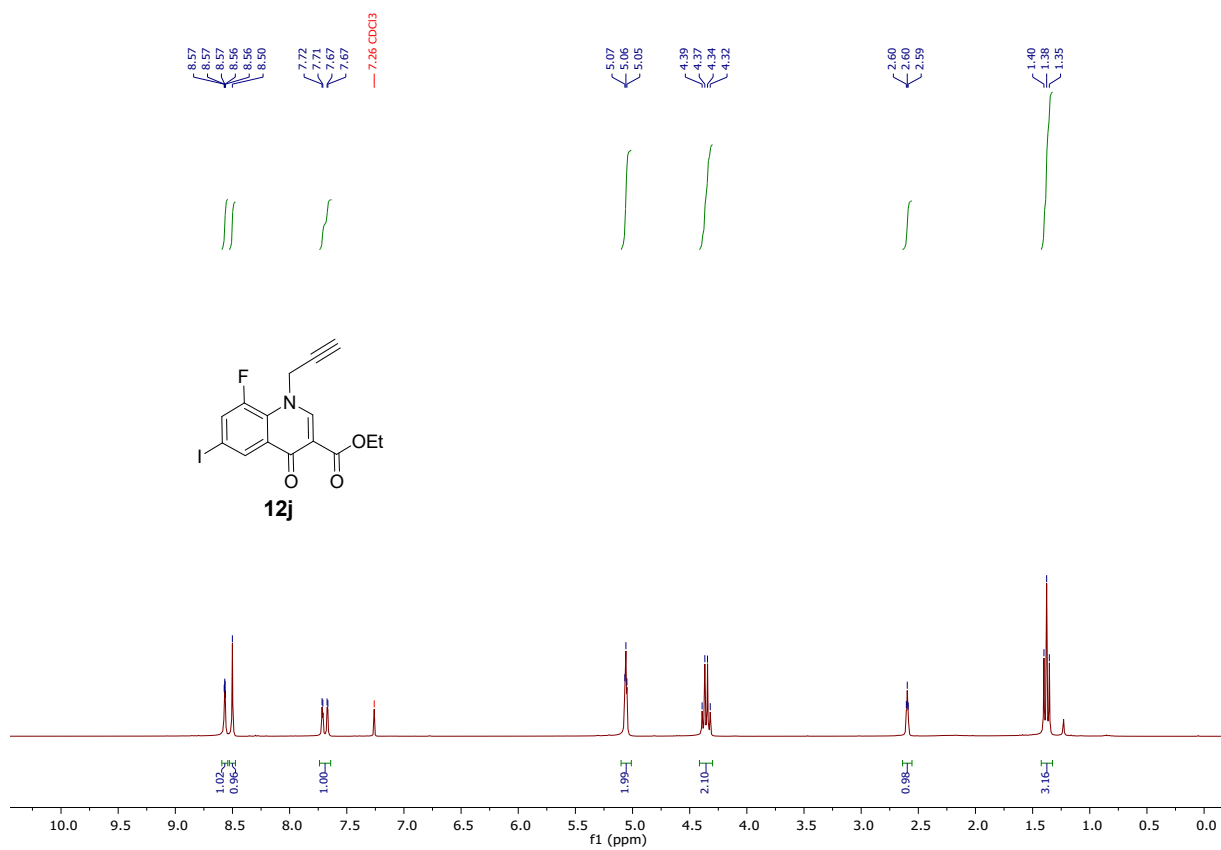

<sup>1</sup>H NMR (300 MHz, CDCl<sub>3</sub>)

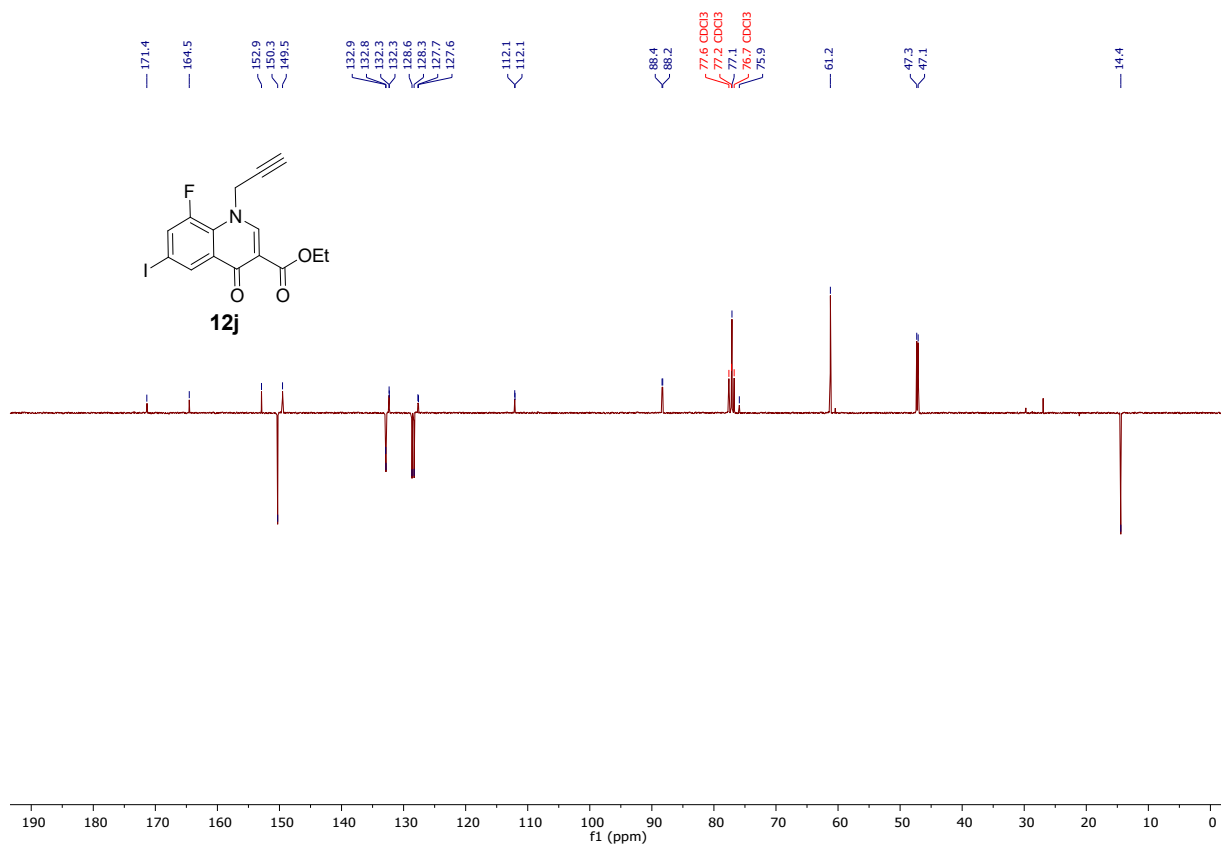

$^{13}\text{C}$  NMR (75 MHz,  $\text{CDCl}_3$ )

-114.1

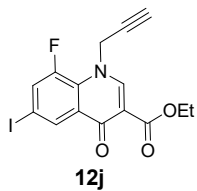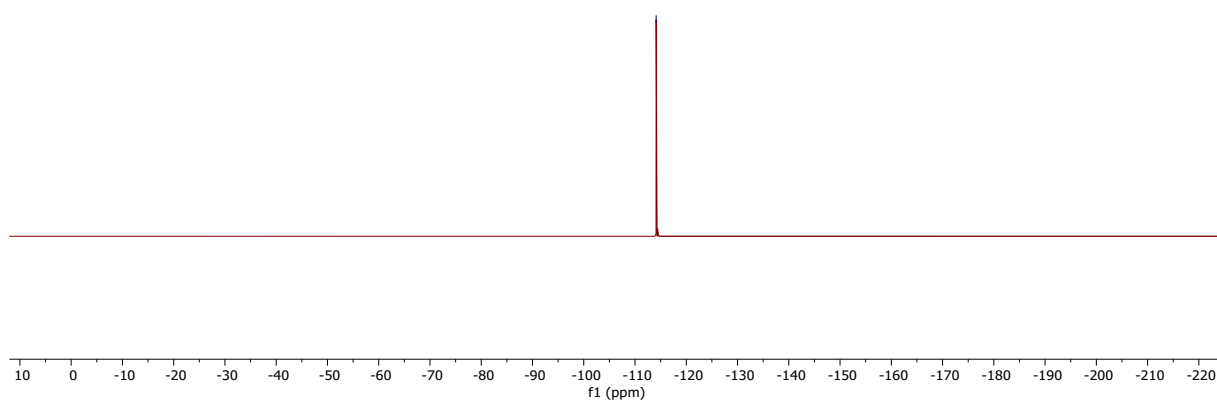

$^{19}\text{F}$  NMR (282 MHz,  $\text{CDCl}_3$ )

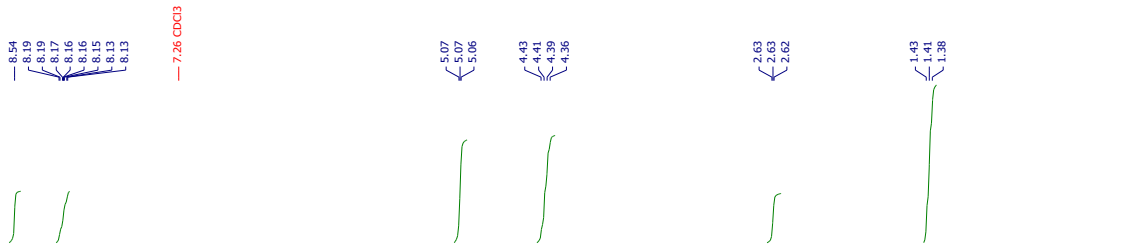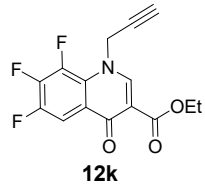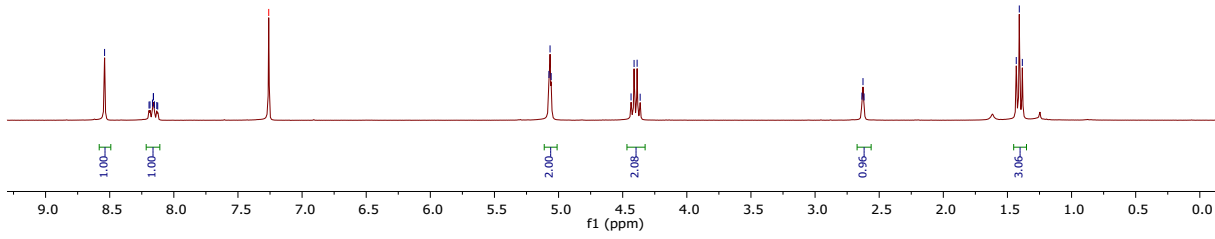

<sup>1</sup>H NMR (300 MHz, CDCl<sub>3</sub>)

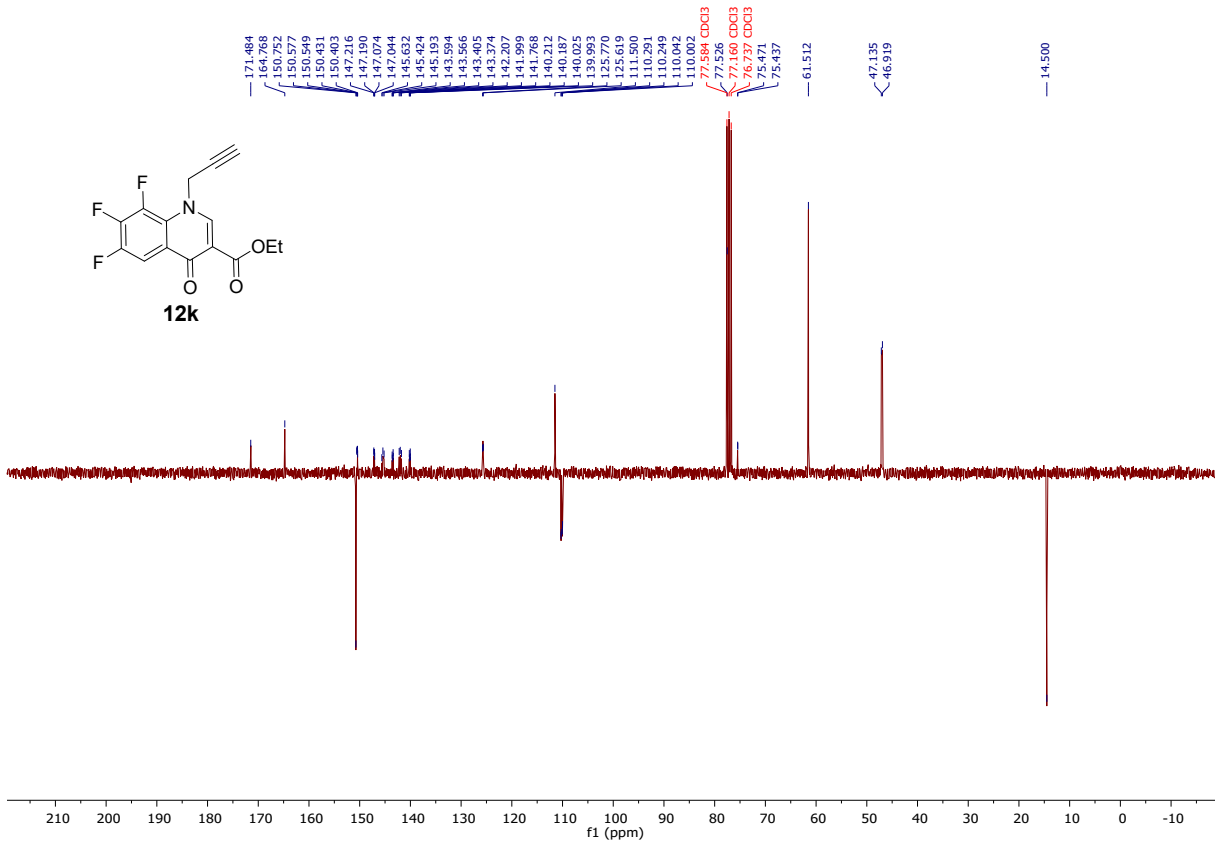

$^{13}\text{C}$  NMR (75 MHz,  $\text{CDCl}_3$ )

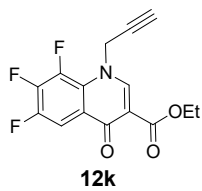

-134.7  
-134.8  
-134.8  
-142.0  
-143.0  
-143.1  
-143.1  
-149.9  
-150.0  
-150.0

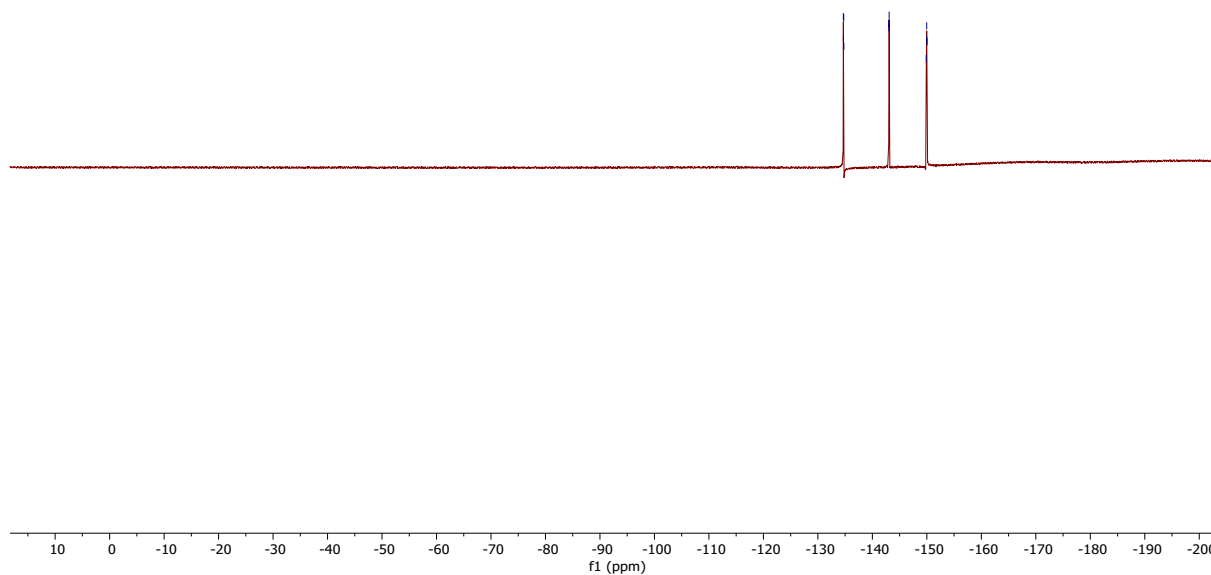

$^{19}\text{F}$  NMR (282 MHz,  $\text{CDCl}_3$ )

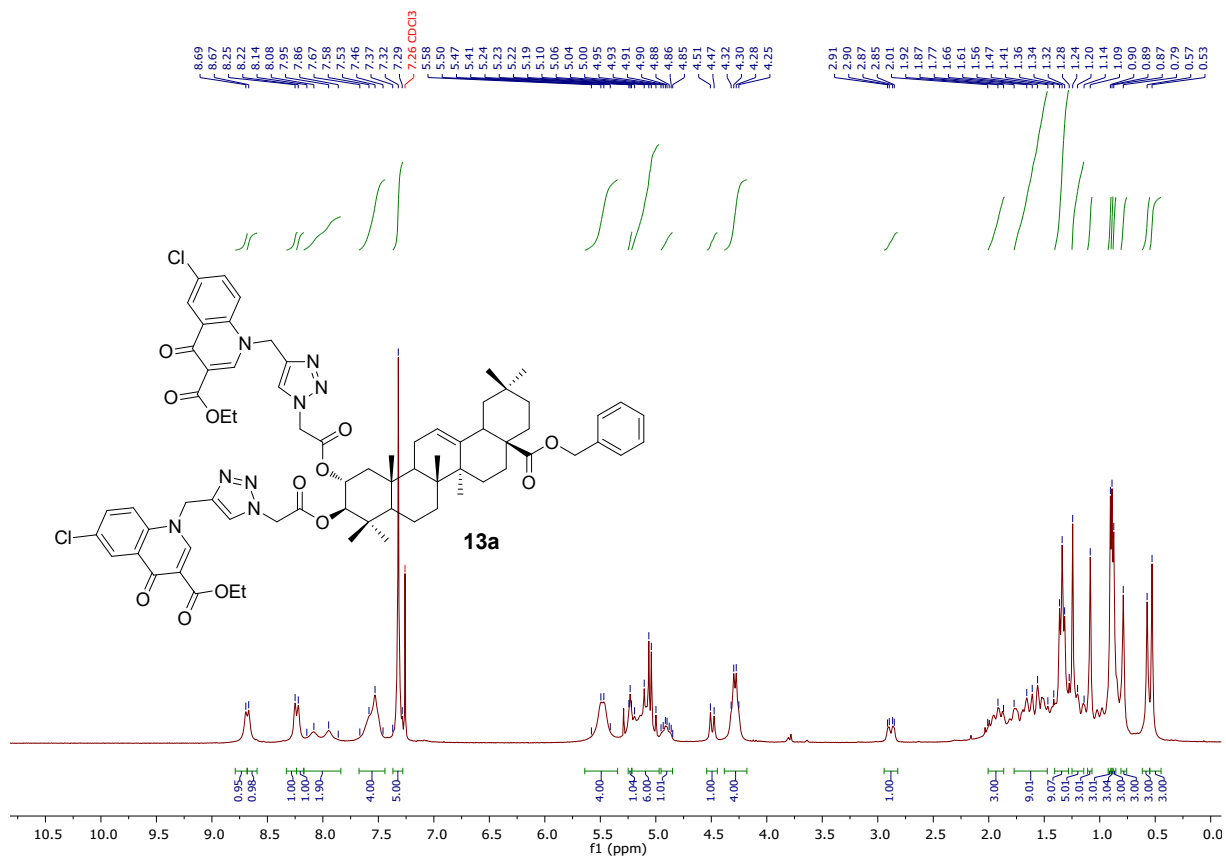

**<sup>1</sup>H NMR (300 MHz, CDCl<sub>3</sub>)**

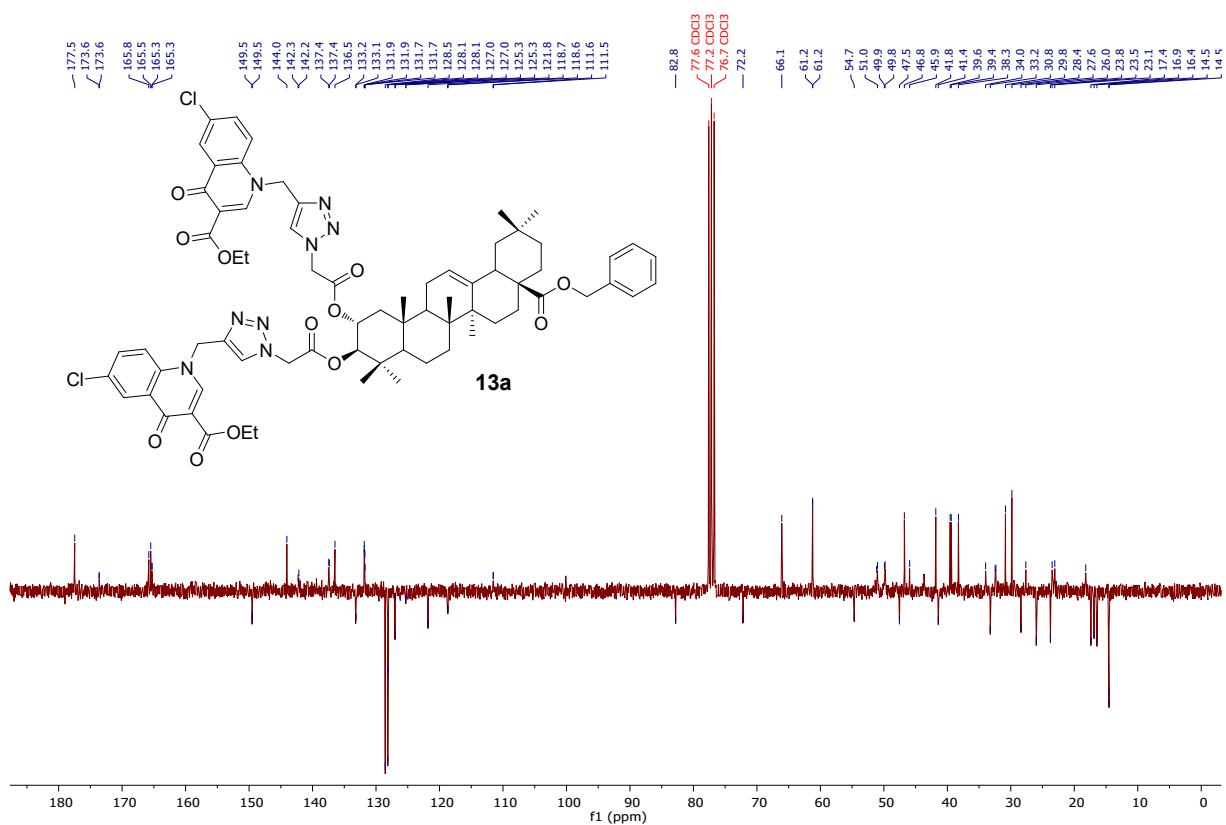



$^{13}\text{C}$  NMR (75 MHz,  $\text{CDCl}_3$ )

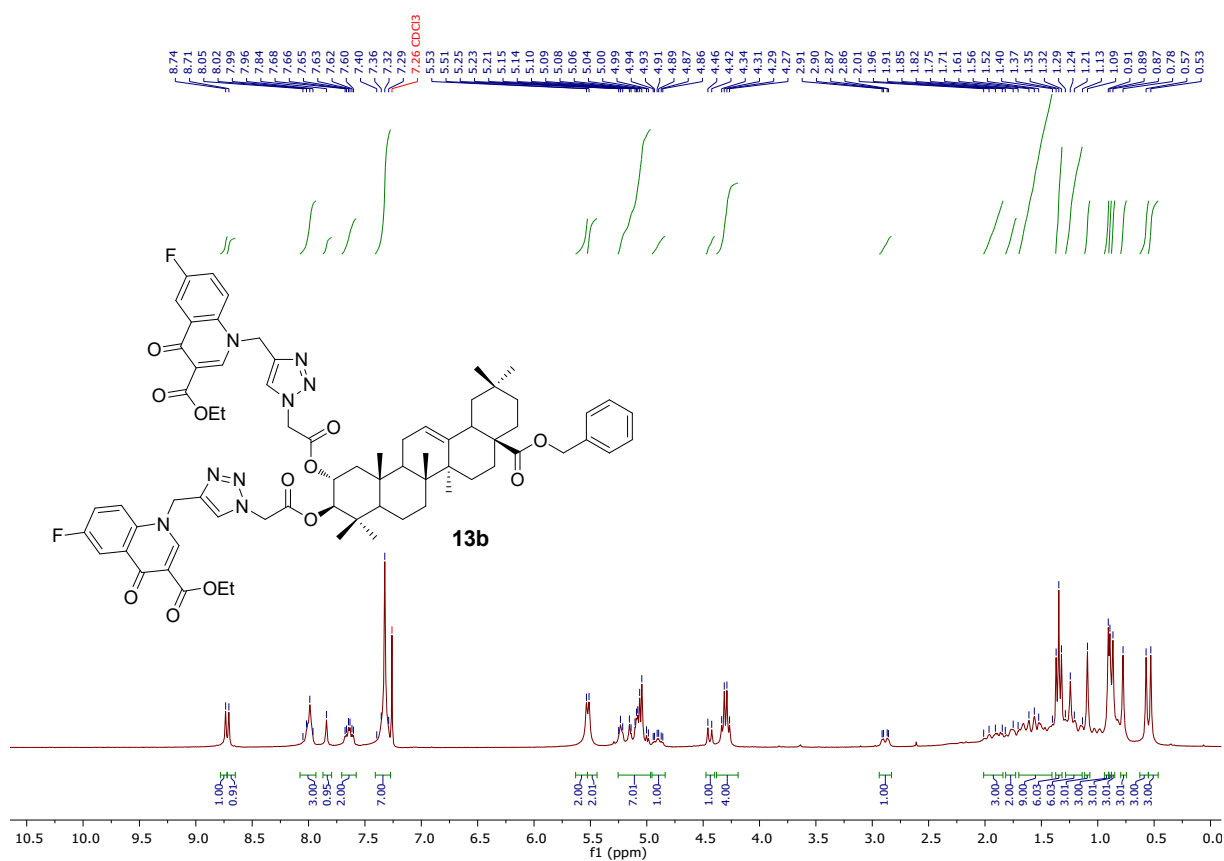

$^1\text{H}$  NMR (300 MHz,  $\text{CDCl}_3$ )

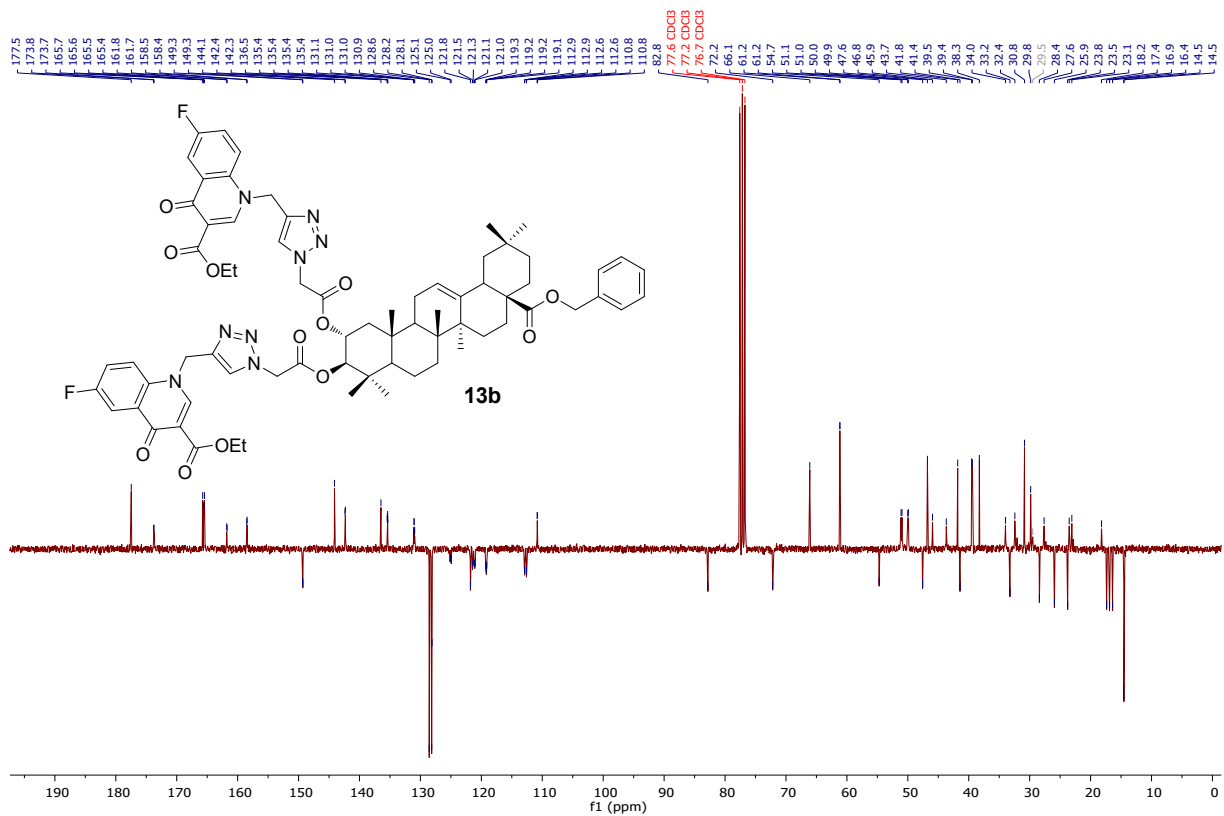

$^{13}\text{C}$  NMR (75 MHz,  $\text{CDCl}_3$ )

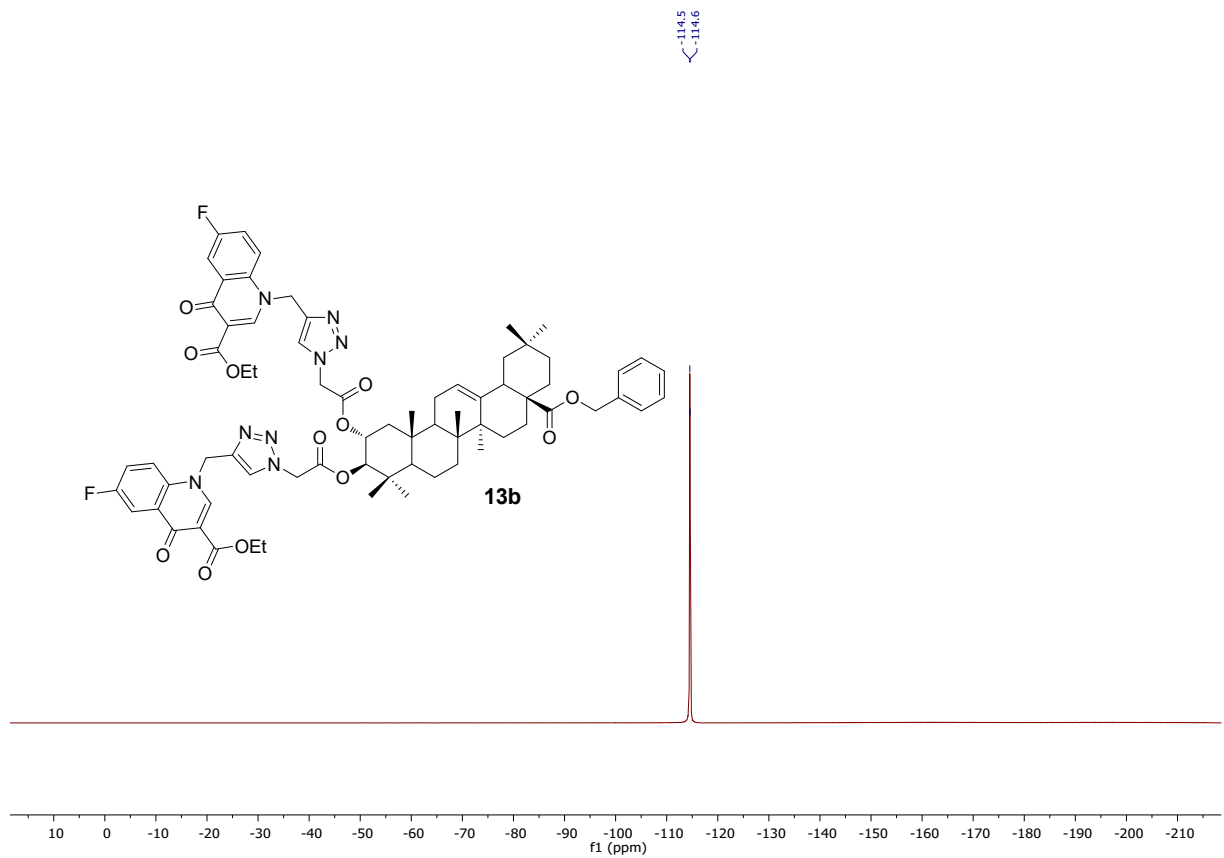

$^{19}\text{F}$  NMR (282 MHz,  $\text{CDCl}_3$ )

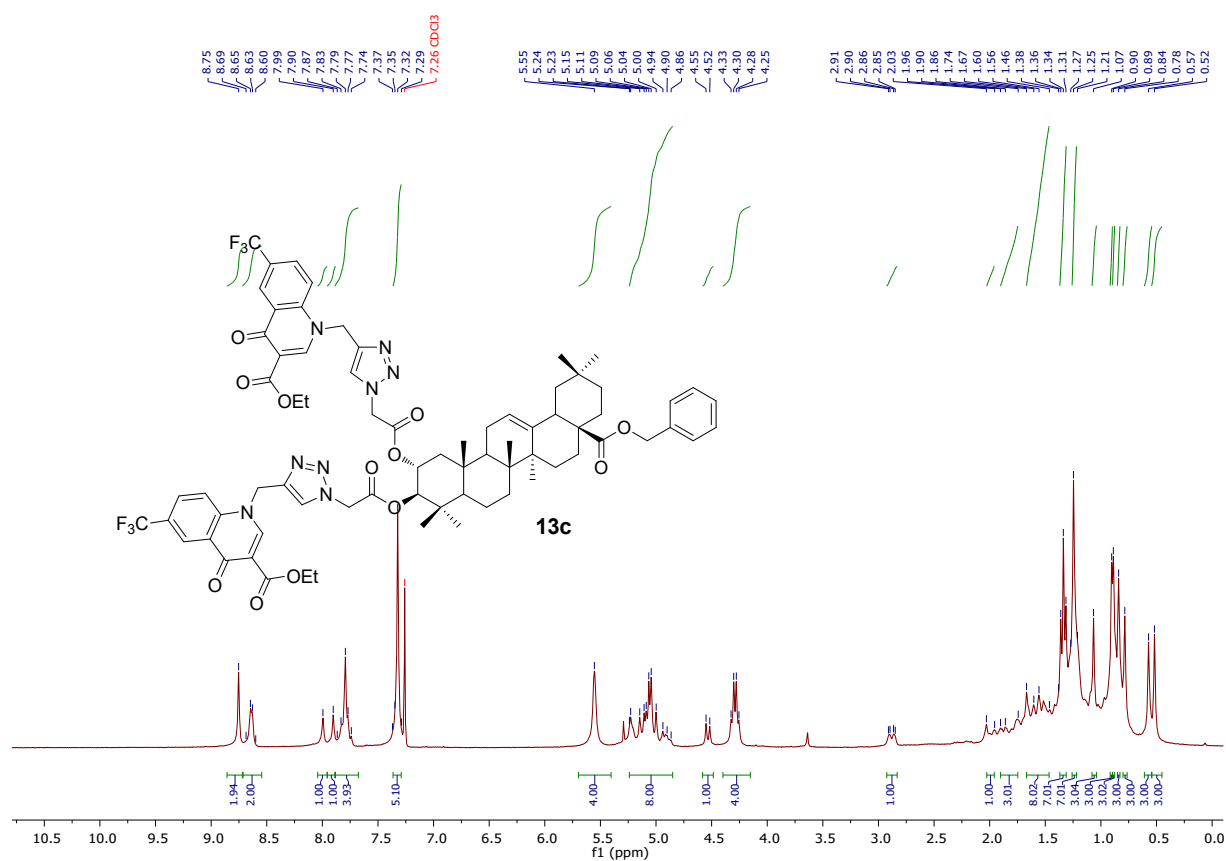

$^1\text{H}$  NMR (300 MHz,  $\text{CDCl}_3$ )

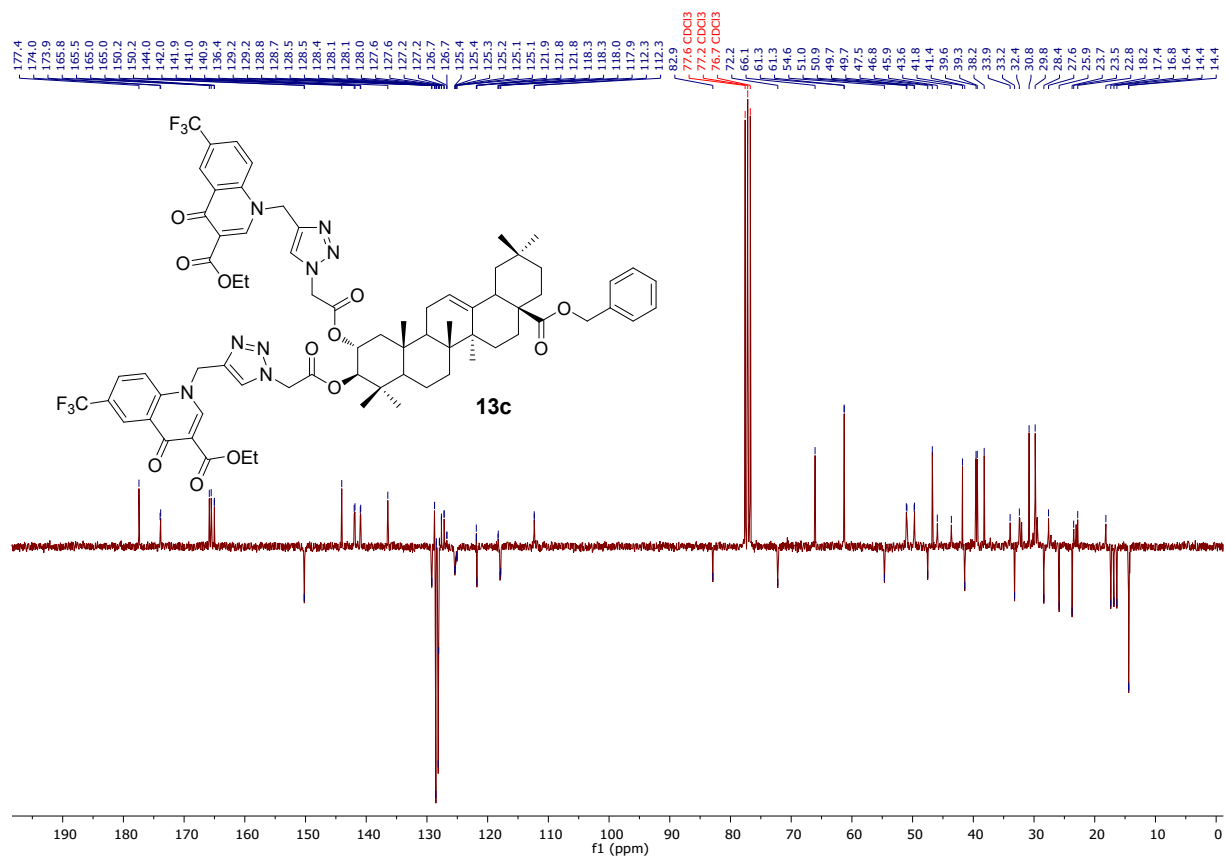

$^{13}\text{C}$  NMR (75 MHz,  $\text{CDCl}_3$ )

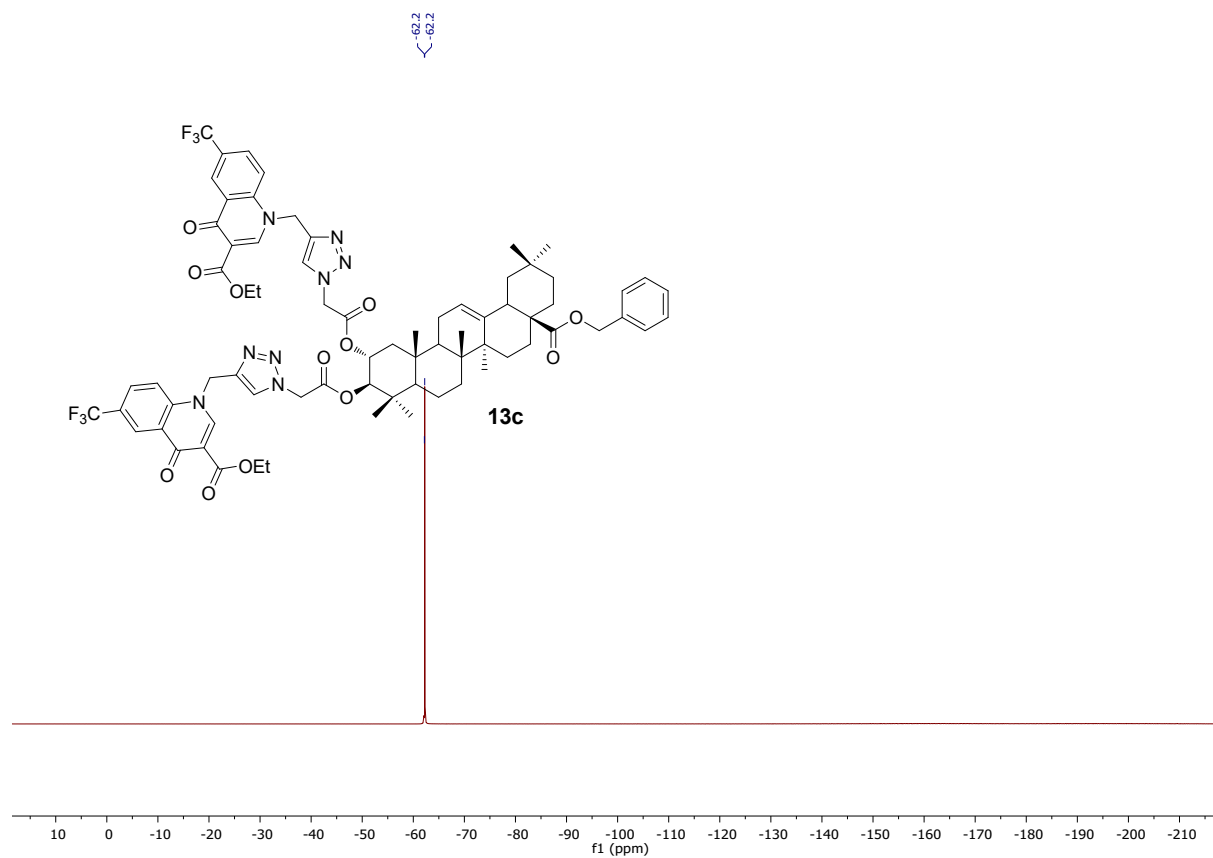

$^{19}\text{F}$  NMR (282 MHz,  $\text{CDCl}_3$ )

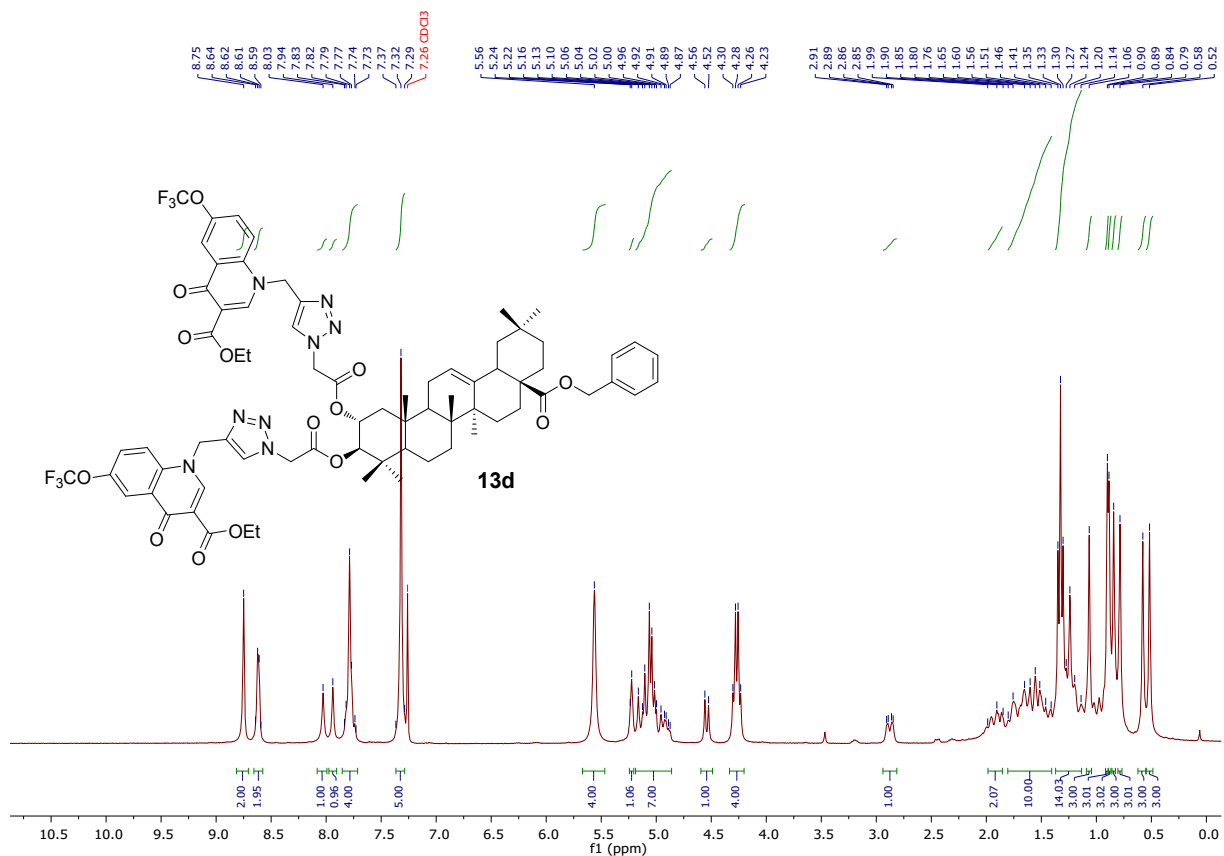

**<sup>1</sup>H NMR (300 MHz, CDCl<sub>3</sub>)**

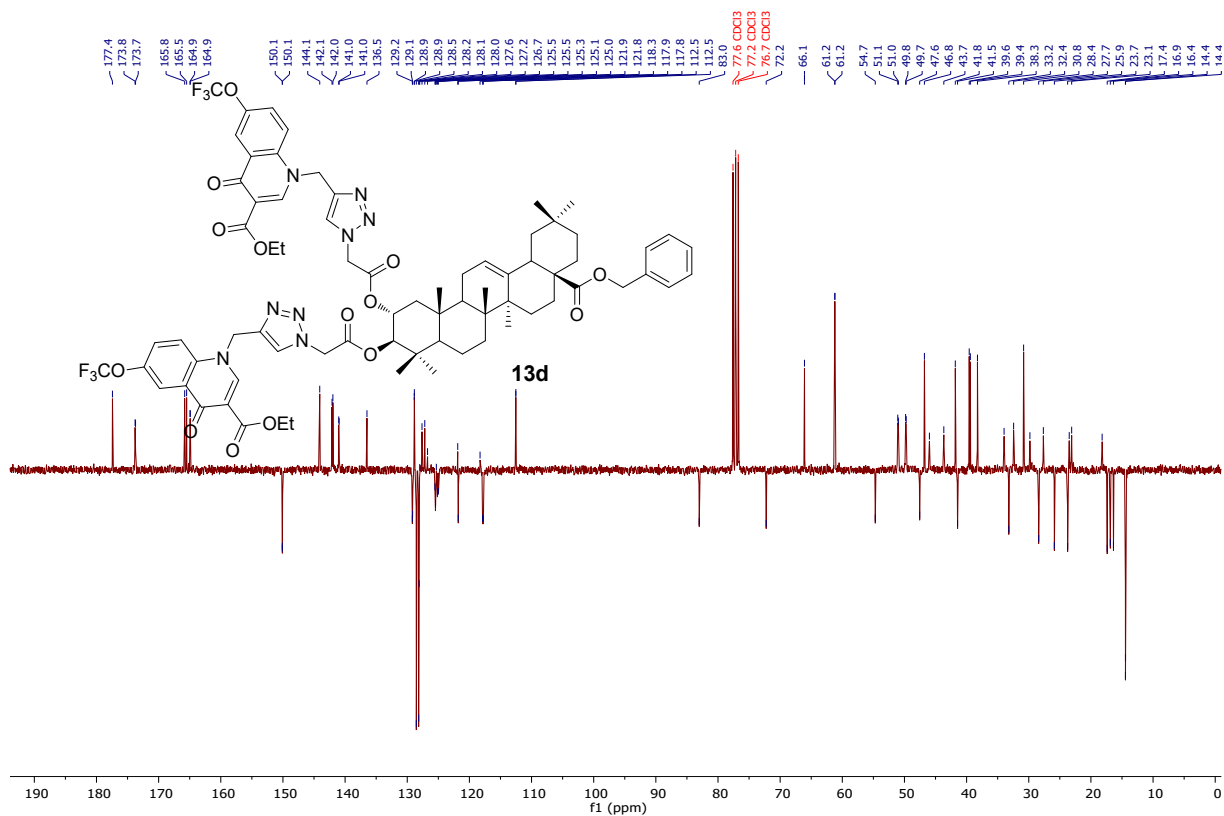

$^{13}\text{C}$  NMR (75 MHz,  $\text{CDCl}_3$ )

62.2

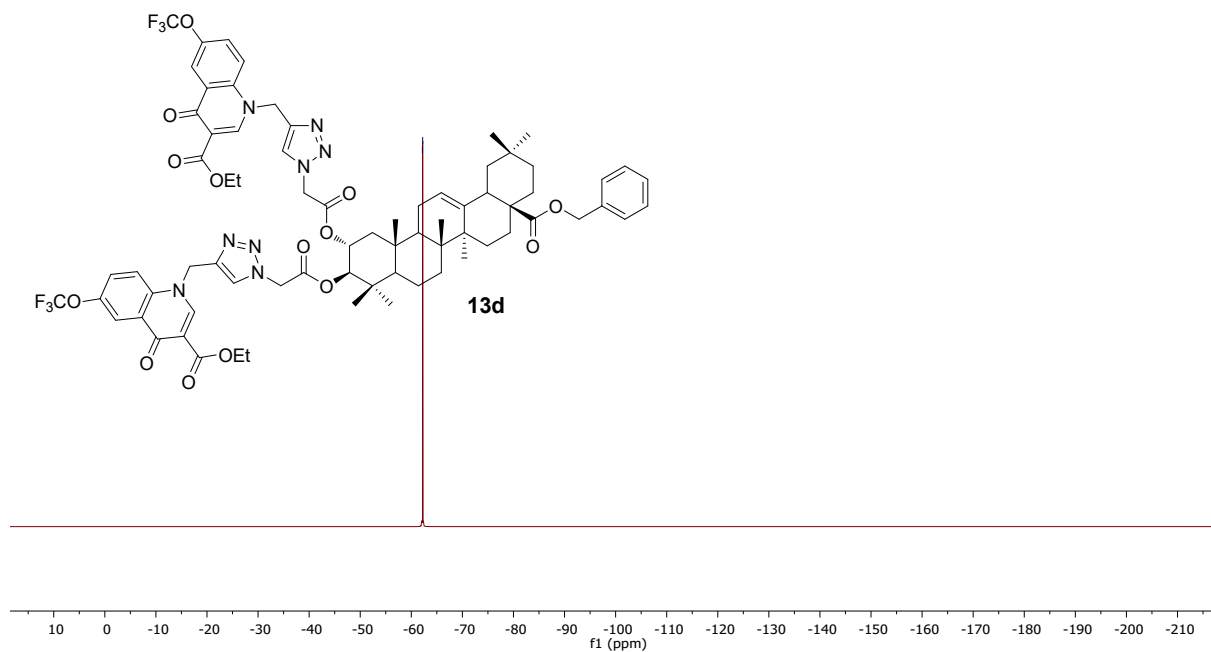

$^{19}\text{F}$  NMR (282 MHz,  $\text{CDCl}_3$ )

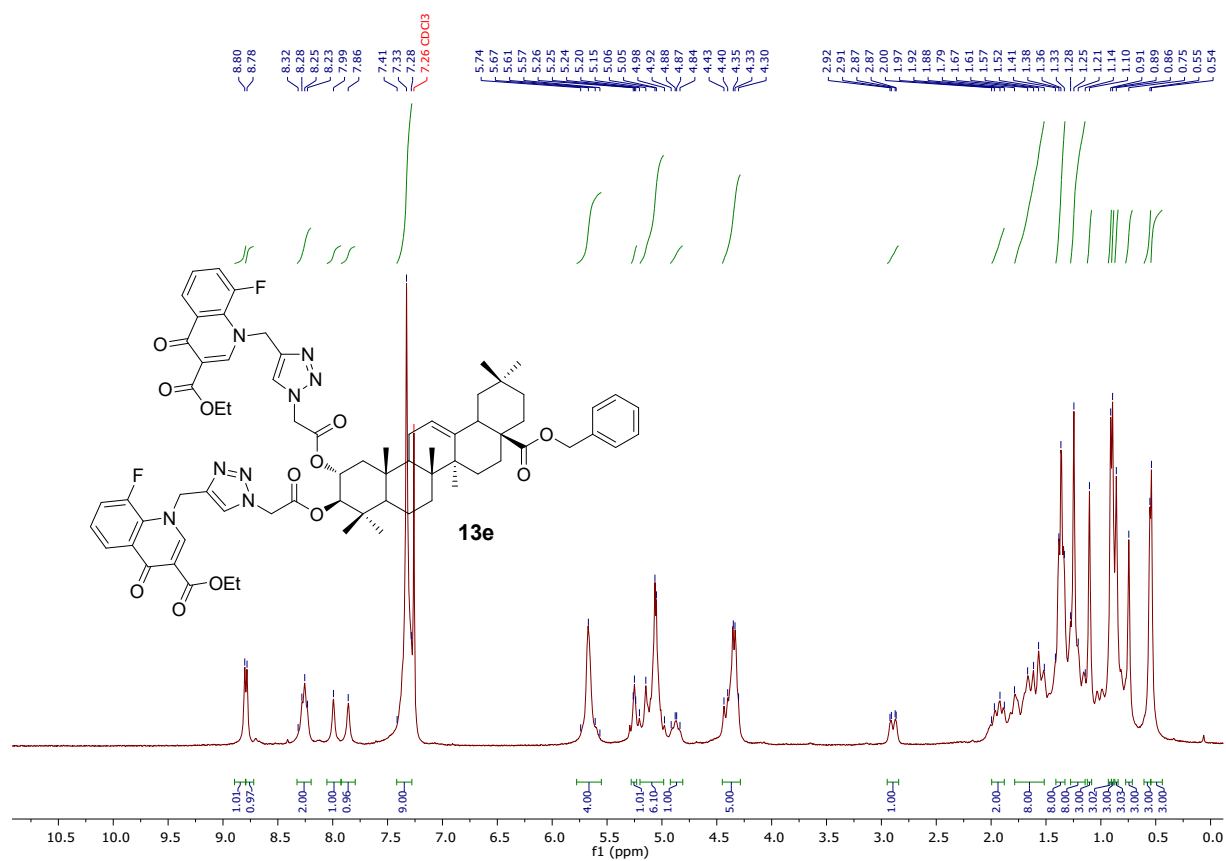

<sup>1</sup>H NMR (300 MHz, CDCl<sub>3</sub>)



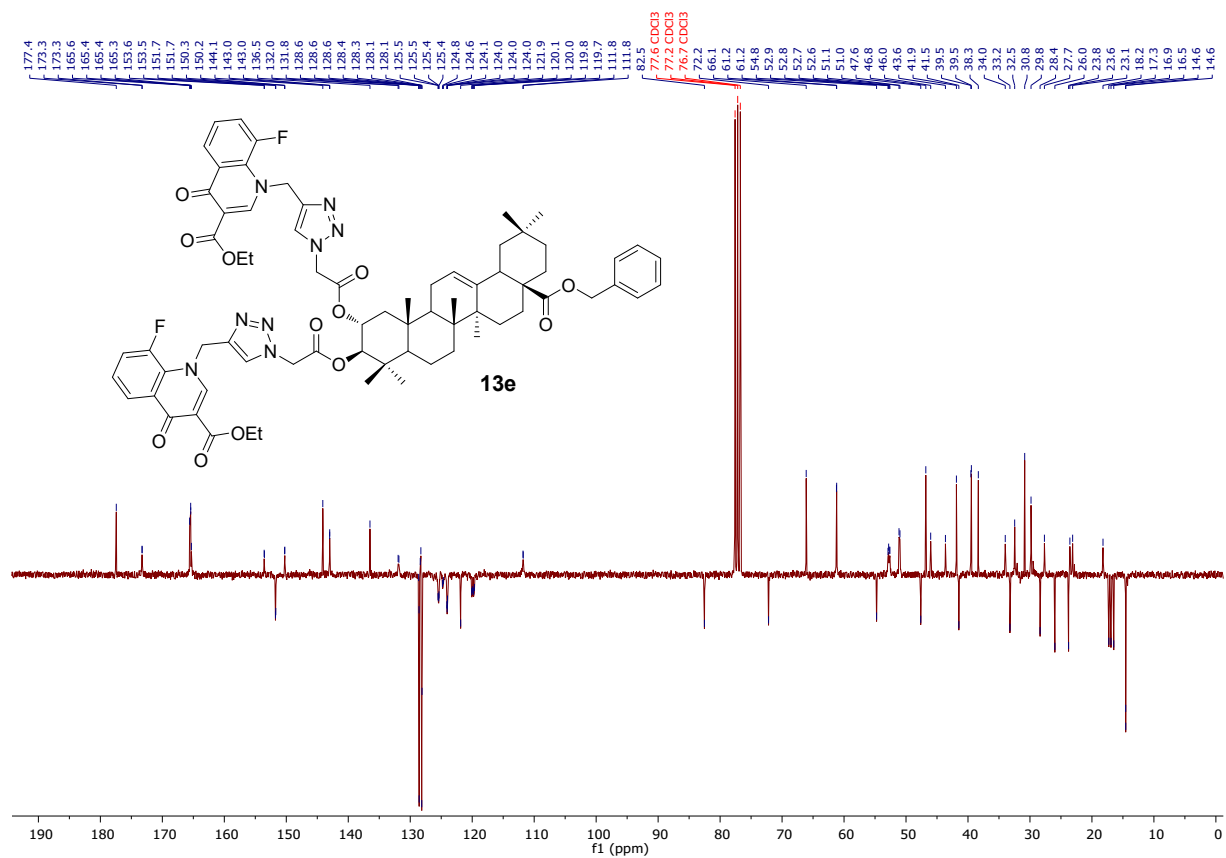

**<sup>13</sup>C NMR (75 MHz, CDCl<sub>3</sub>)**

-121.5

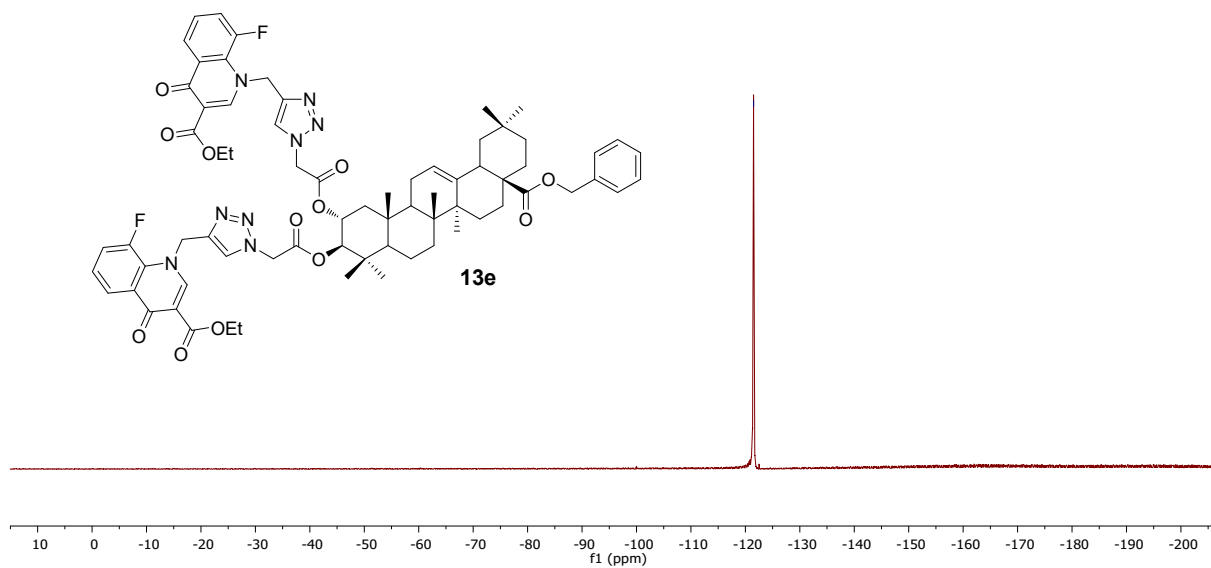

$^{19}\text{F}$  NMR (282 MHz,  $\text{CDCl}_3$ )

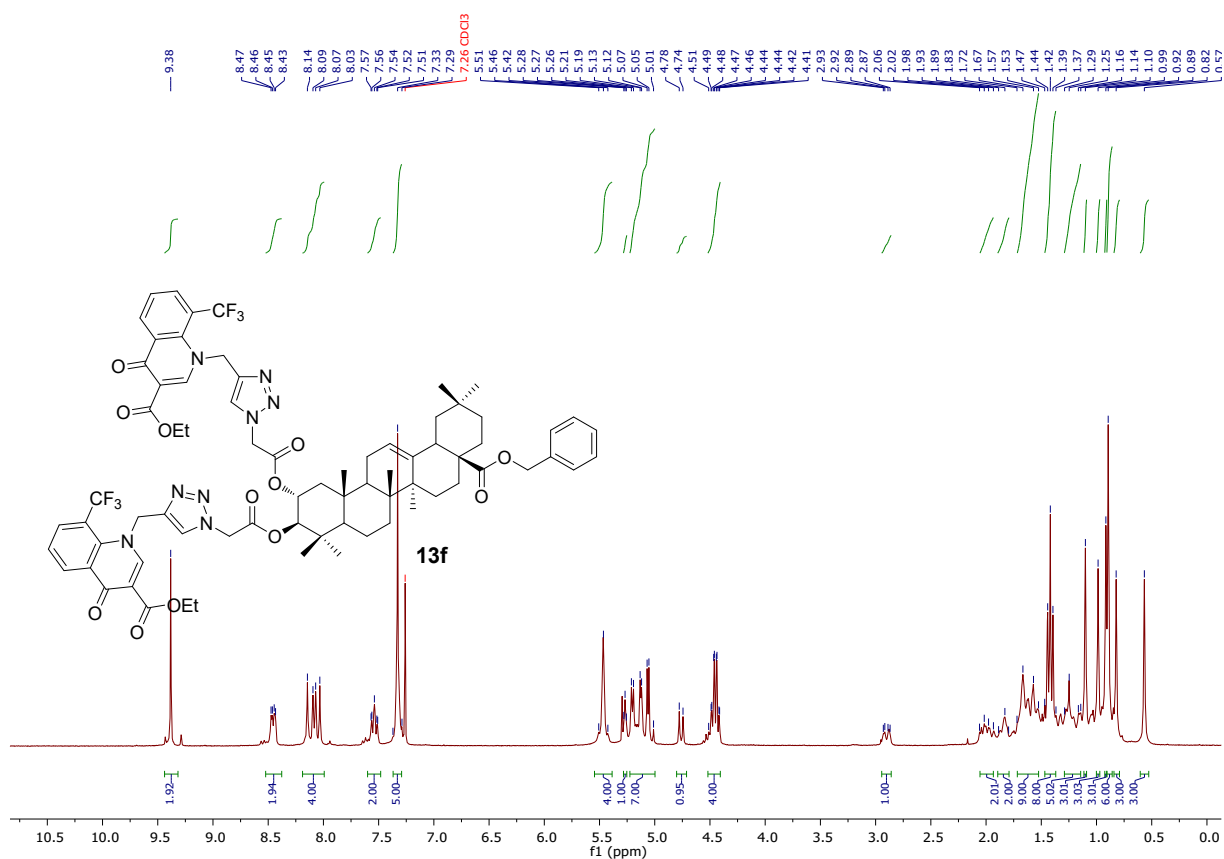

$^1\text{H NMR}$  (300 MHz,  $\text{CDCl}_3$ )

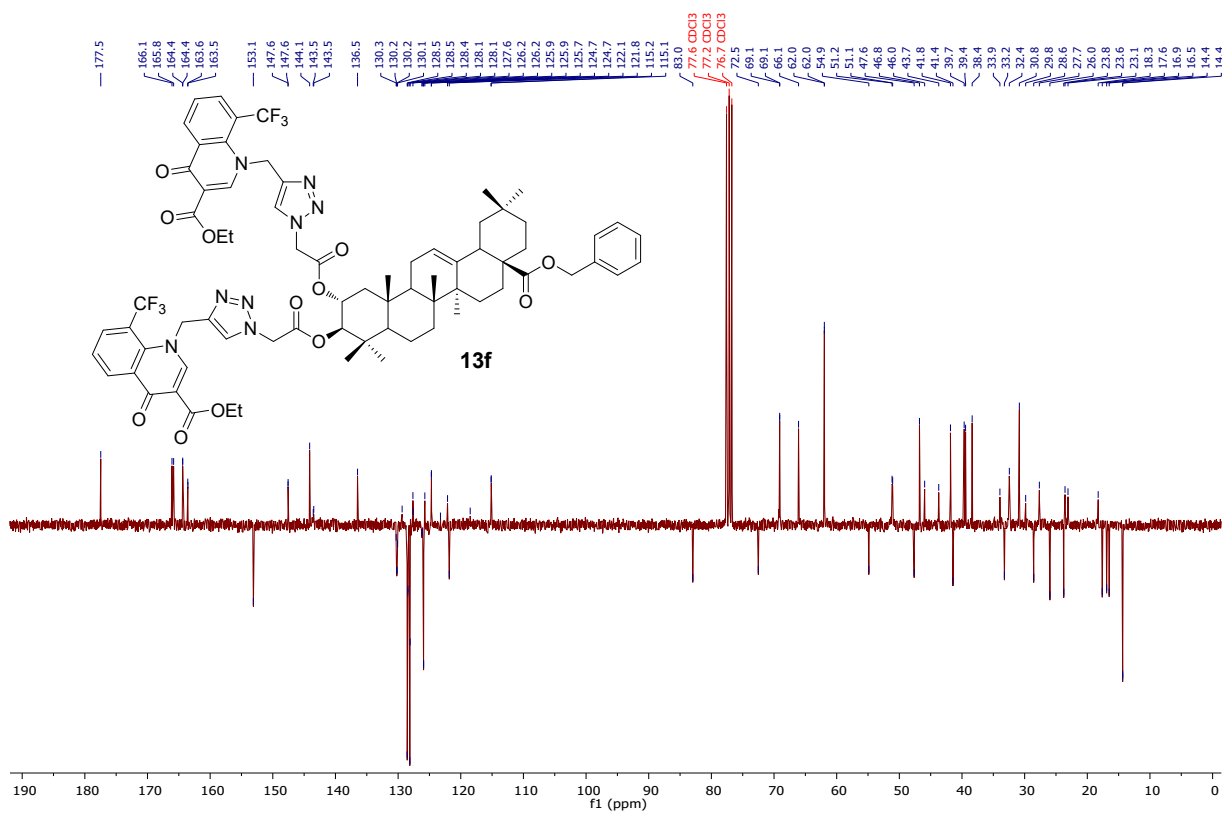

$^{13}\text{C}$  NMR (75 MHz,  $\text{CDCl}_3$ )

-60.2

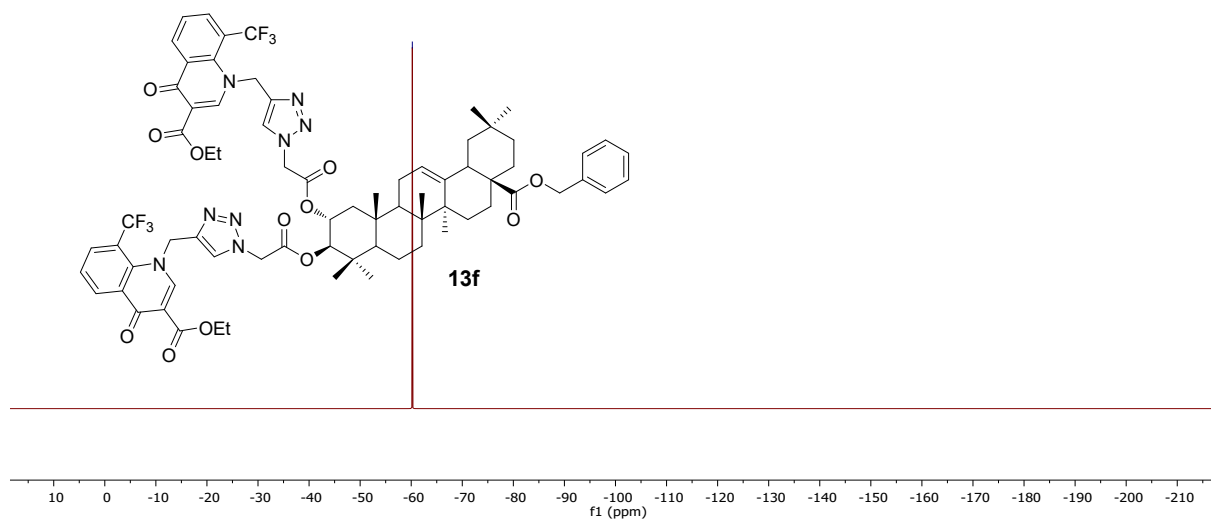

$^{19}\text{F}$  NMR (282 MHz,  $\text{CDCl}_3$ )

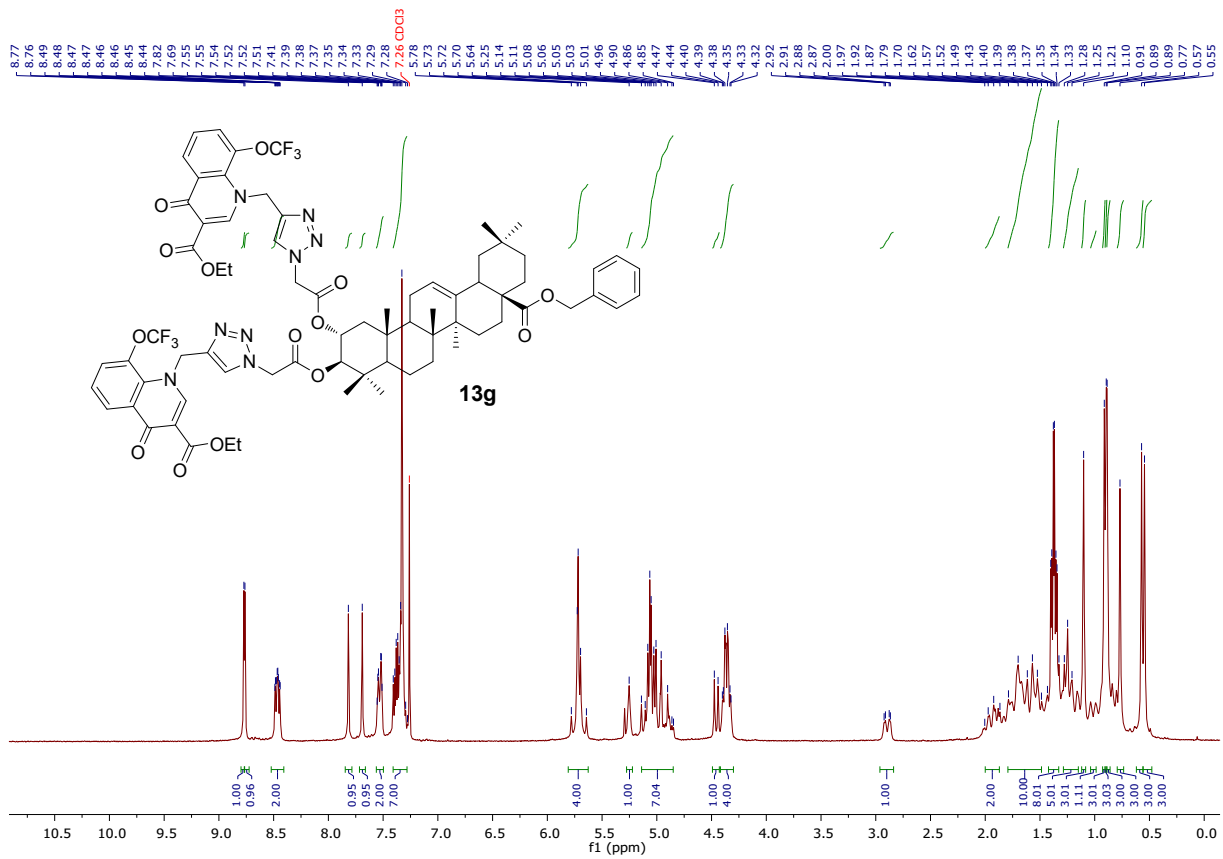

<sup>1</sup>H NMR (300 MHz, CDCl<sub>3</sub>)

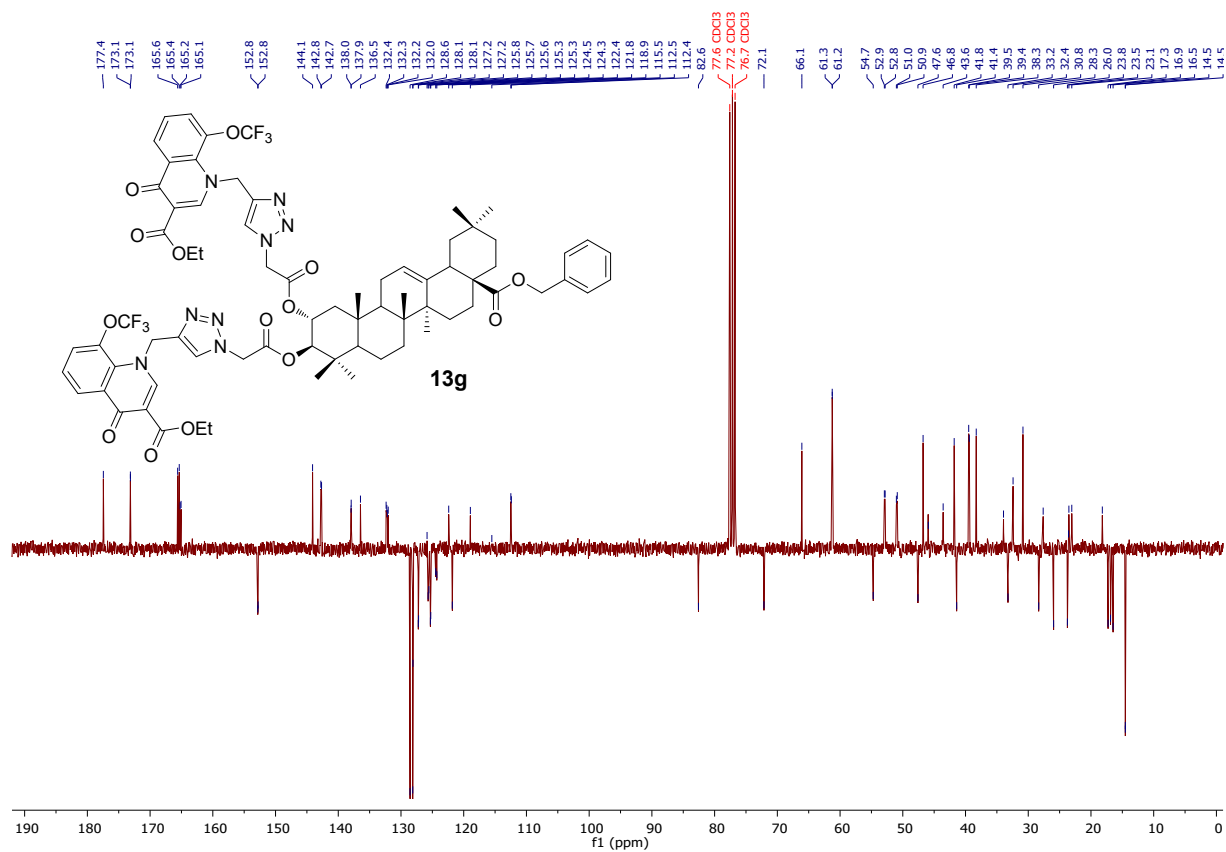

**<sup>13</sup>C NMR (75 MHz, CDCl<sub>3</sub>)**

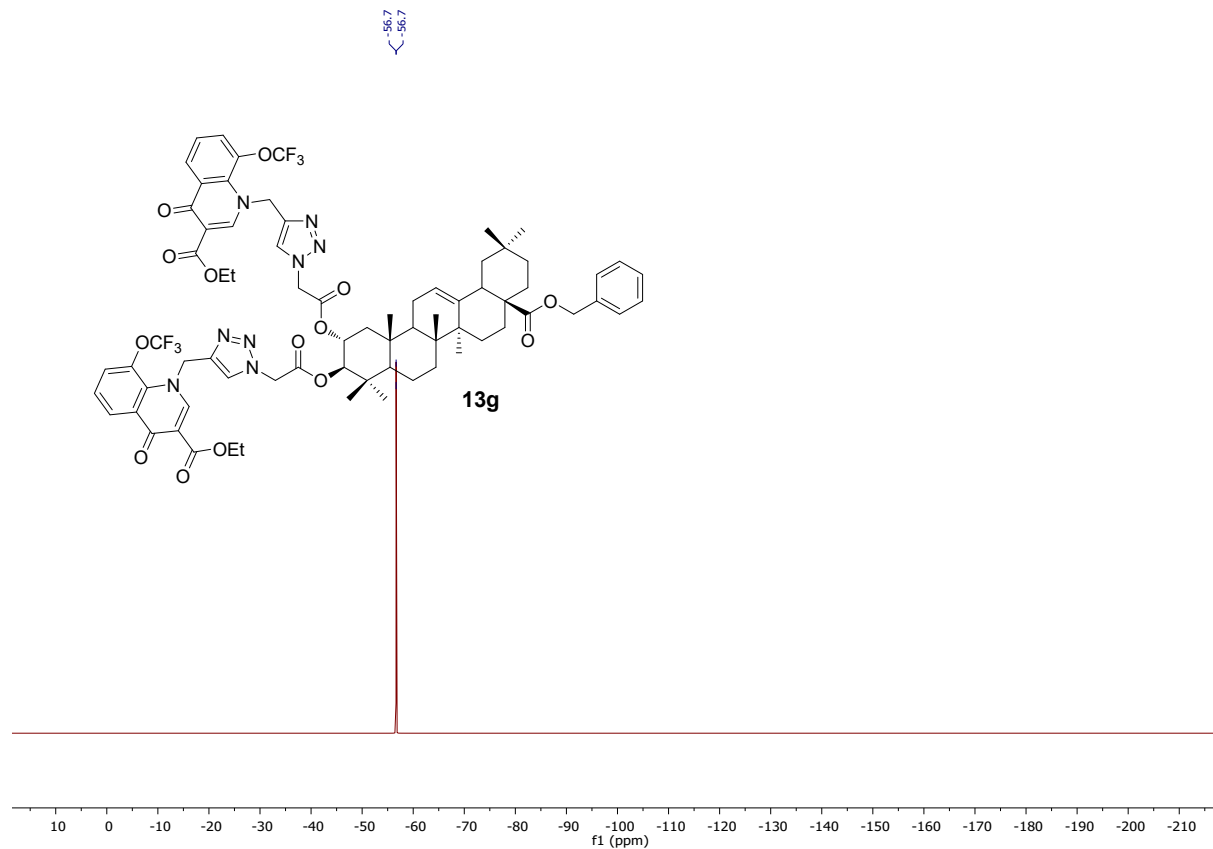

$^{19}\text{F}$  NMR (282 MHz,  $\text{CDCl}_3$ )

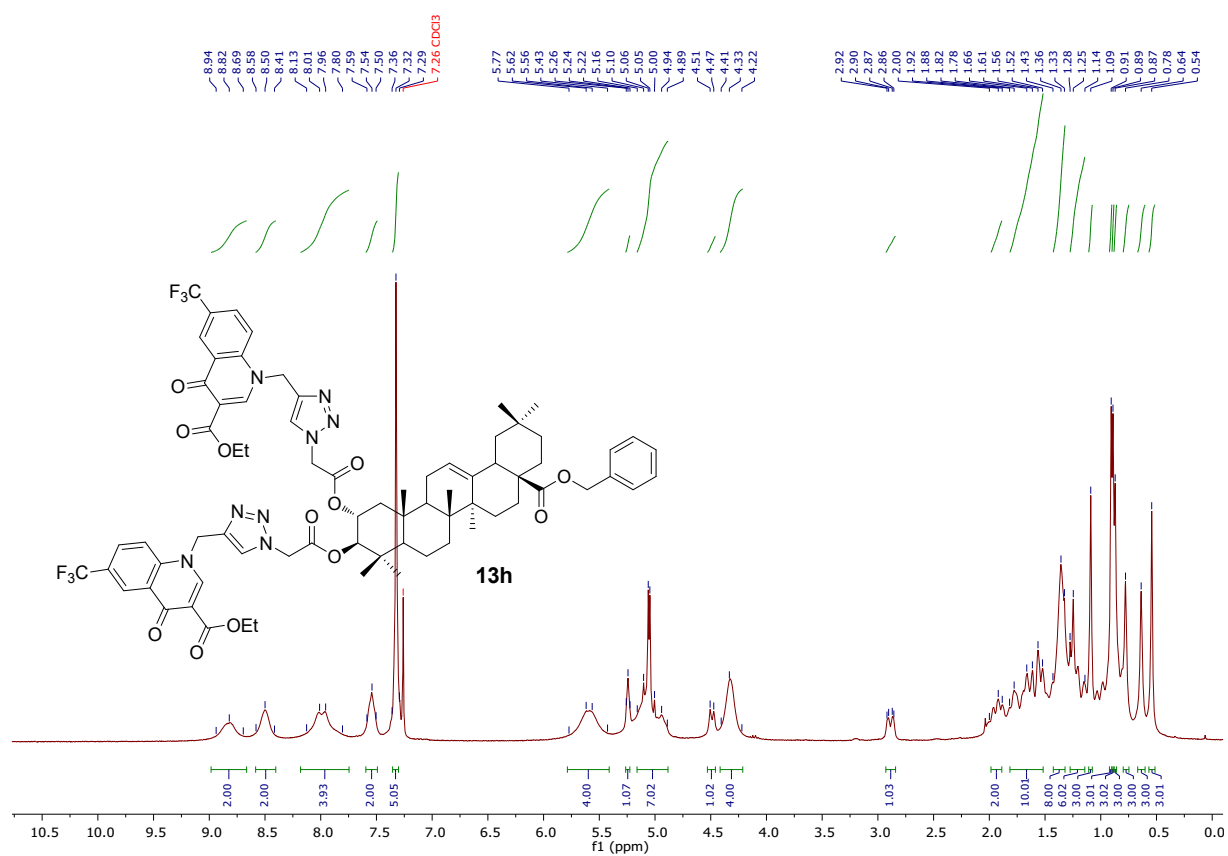

$^1\text{H}$  NMR (300 MHz,  $\text{CDCl}_3$ )

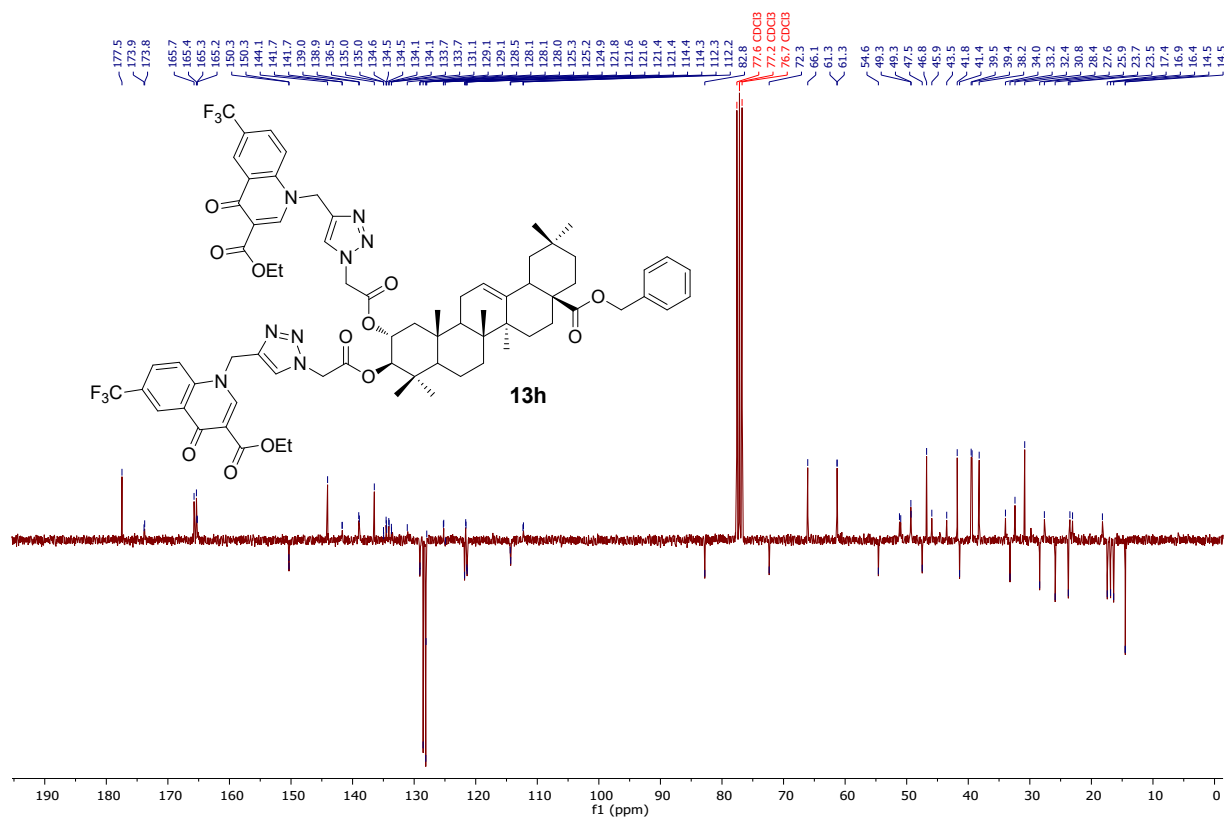

**<sup>13</sup>C NMR (75 MHz, CDCl<sub>3</sub>)**

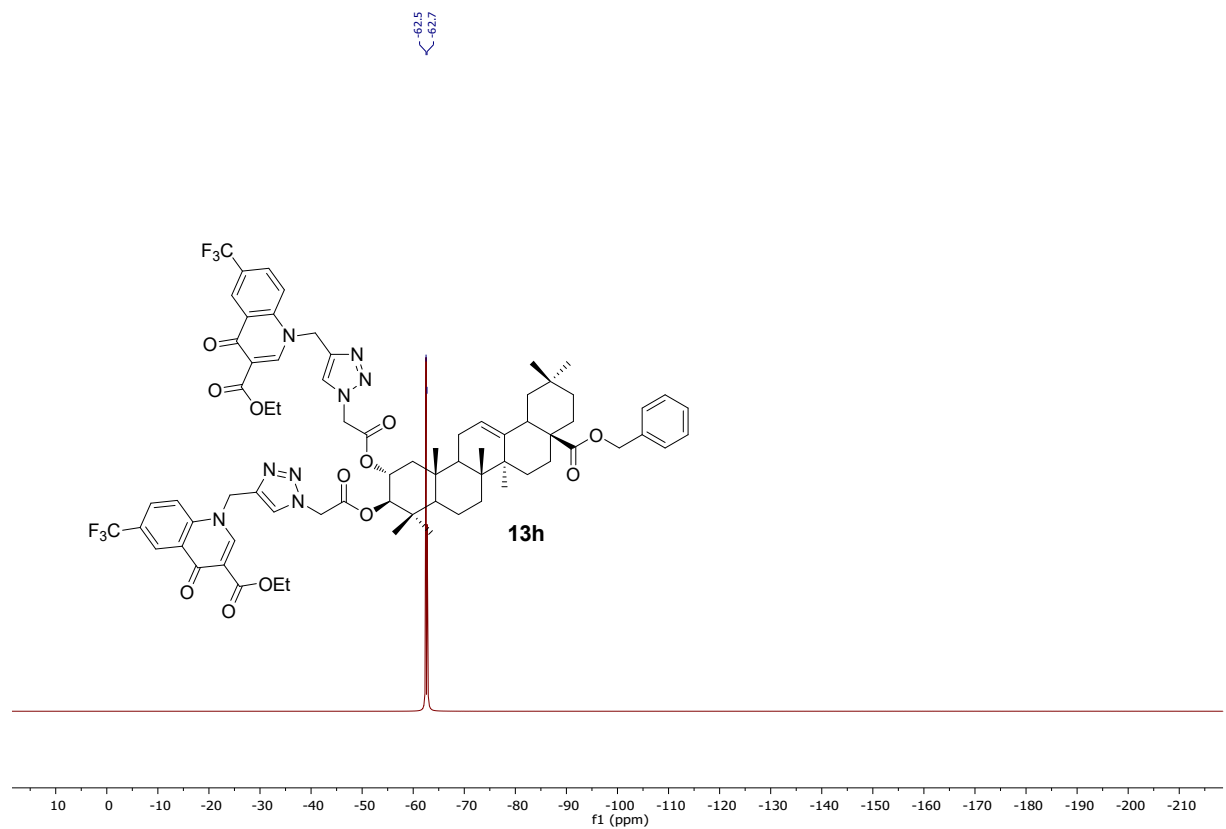



$^{19}\text{F}$  NMR (282 MHz,  $\text{CDCl}_3$ )

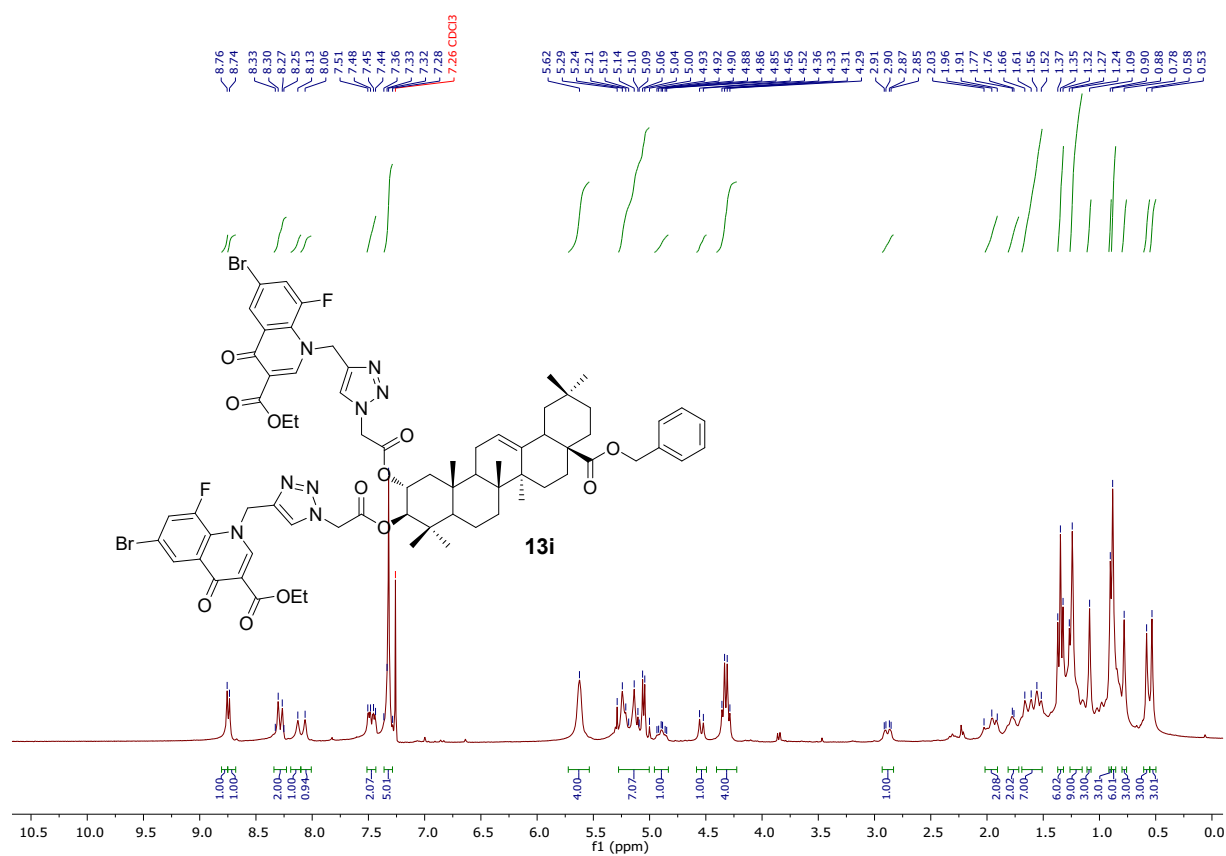

$^1\text{H}$  NMR (300 MHz,  $\text{CDCl}_3$ )

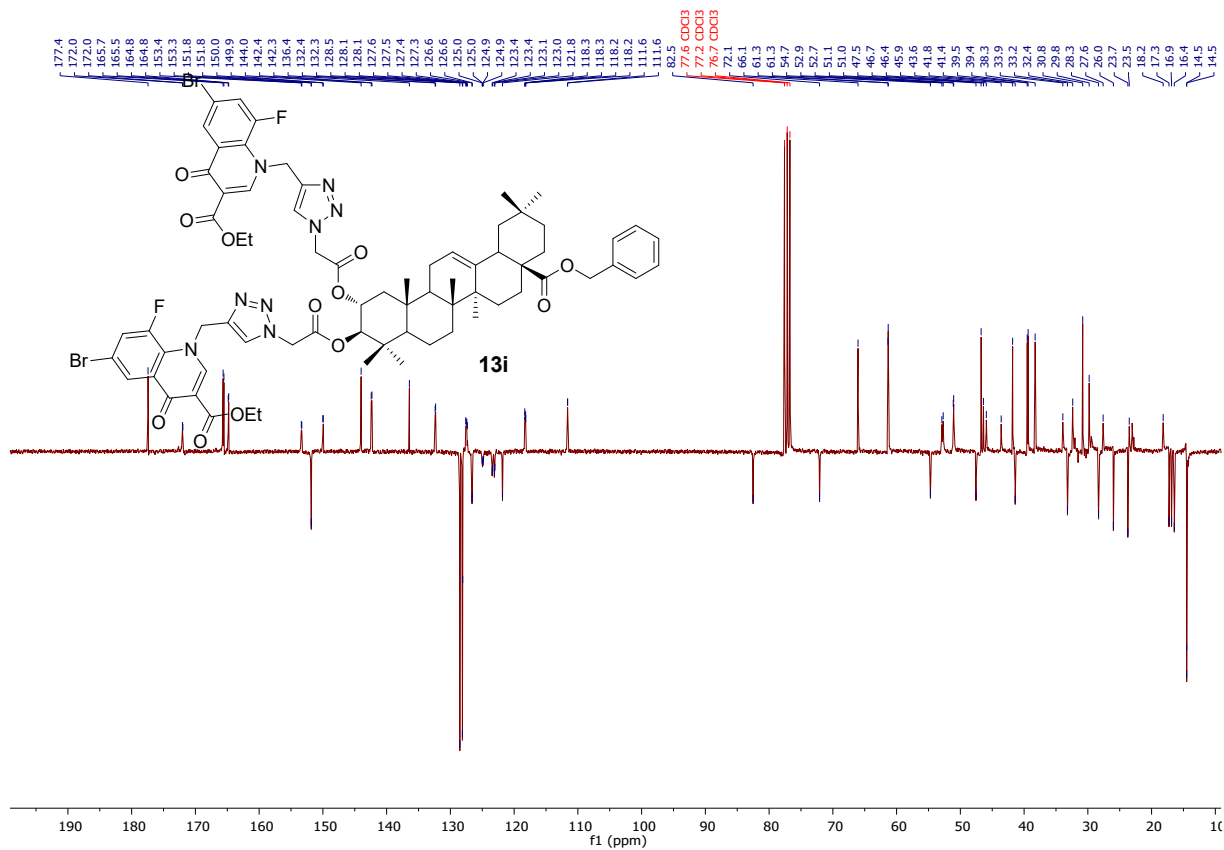

$^{13}\text{C}$  NMR (75 MHz,  $\text{CDCl}_3$ )

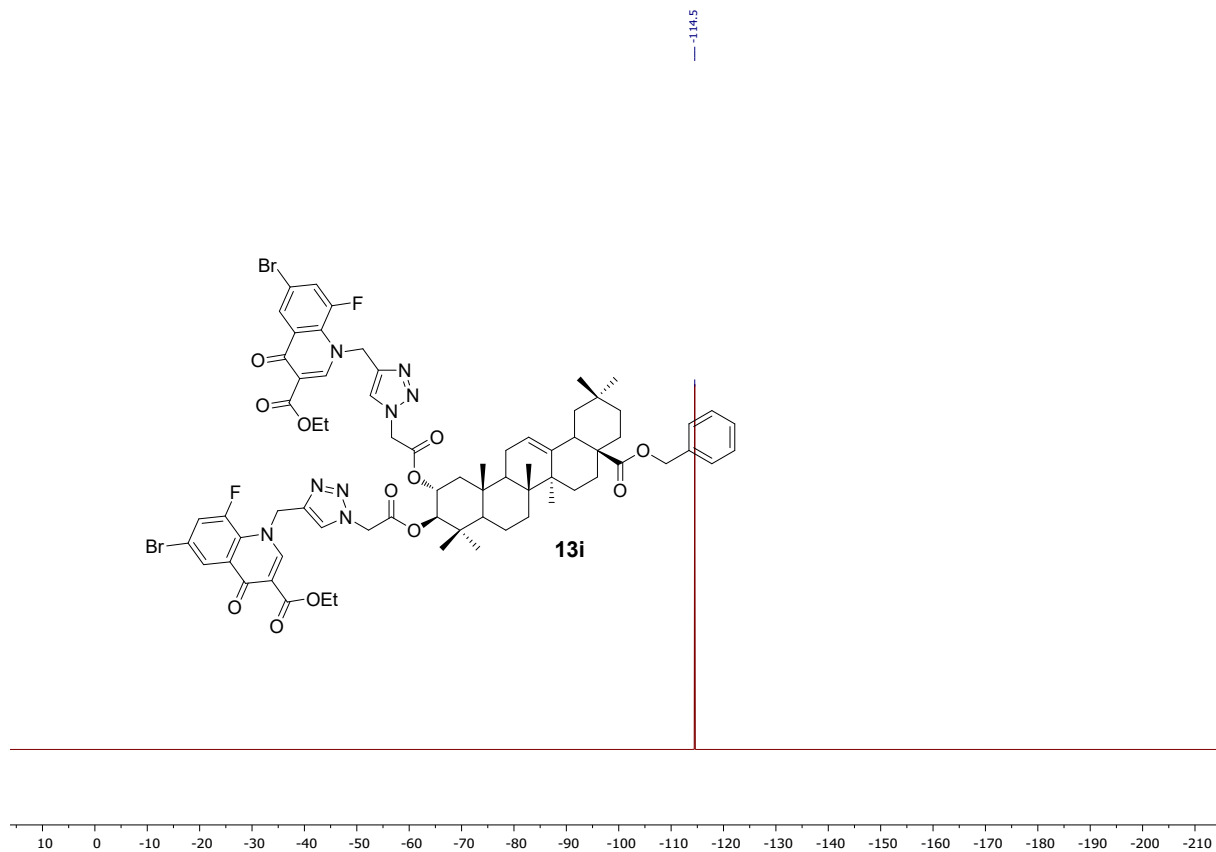

$^{19}\text{F}$  NMR (282 MHz,  $\text{CDCl}_3$ )

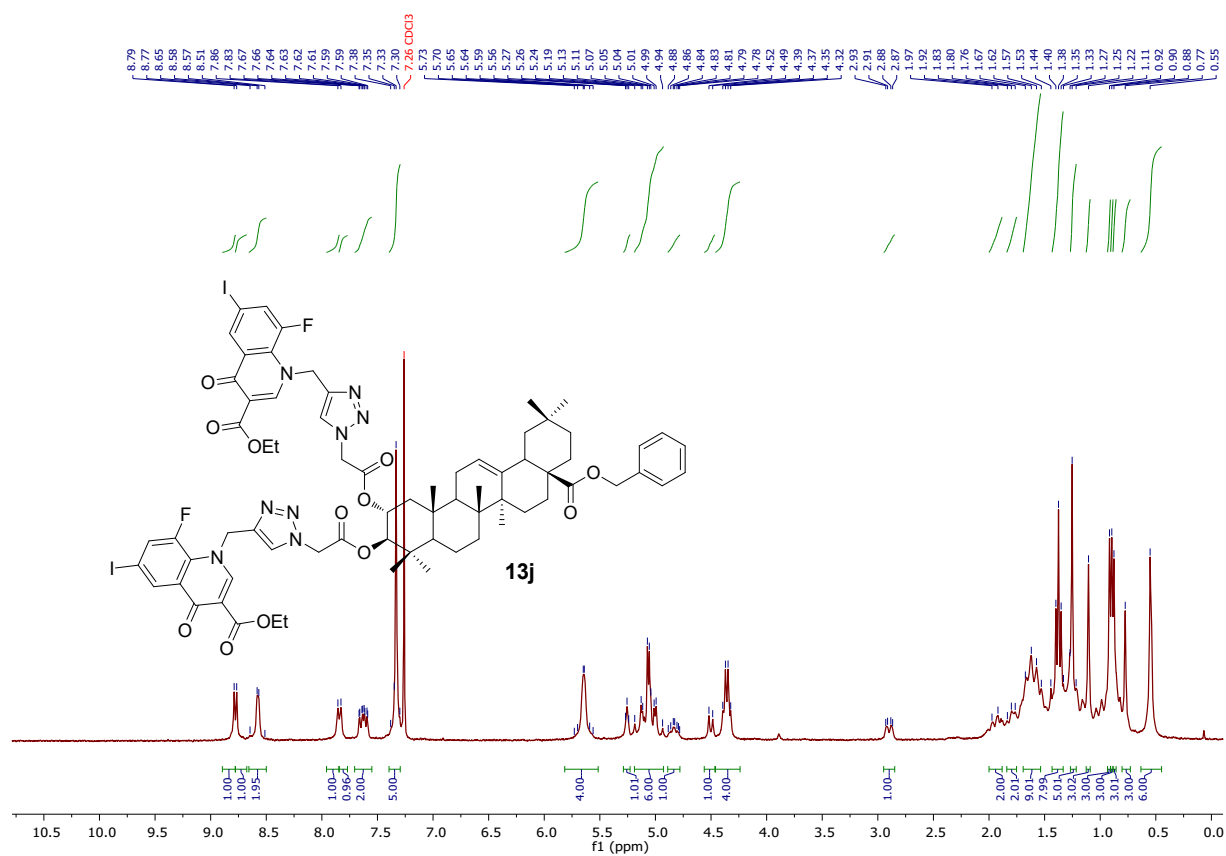

$^1\text{H}$  NMR (300 MHz,  $\text{CDCl}_3$ )

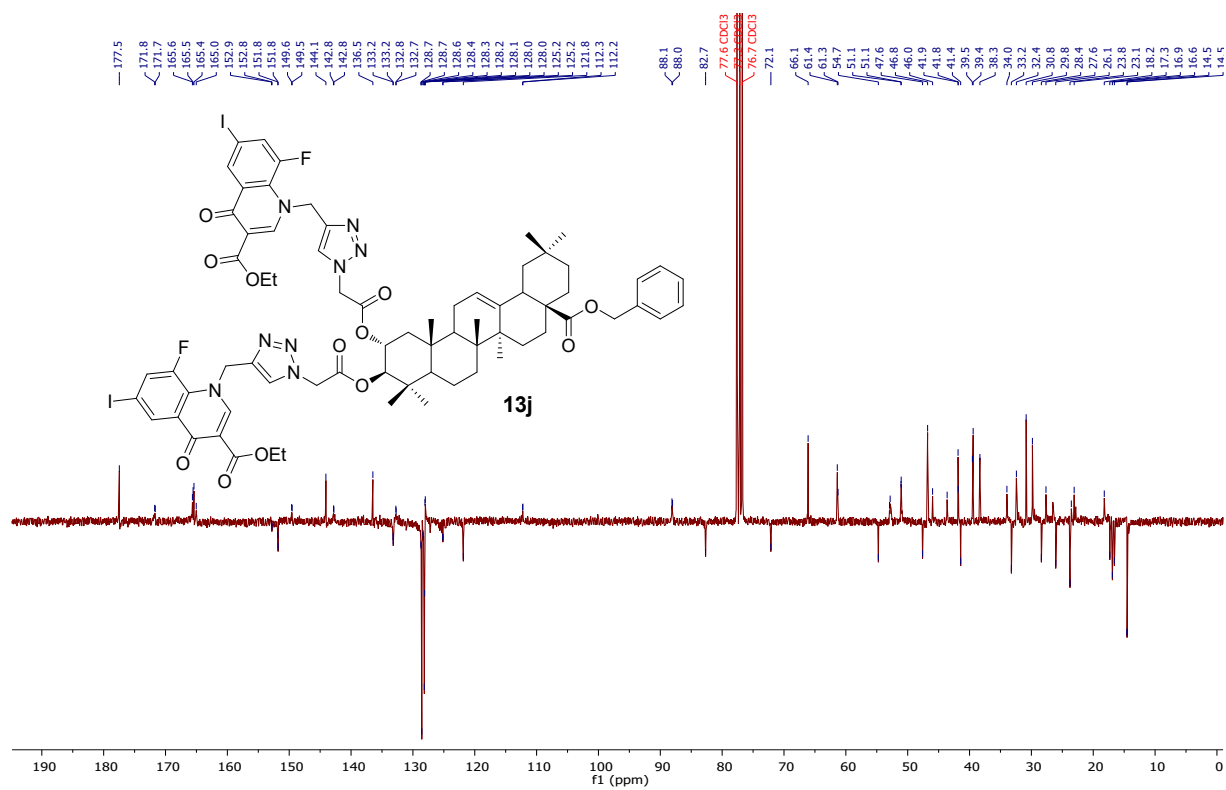

$^{13}\text{C}$  NMR (75 MHz,  $\text{CDCl}_3$ )

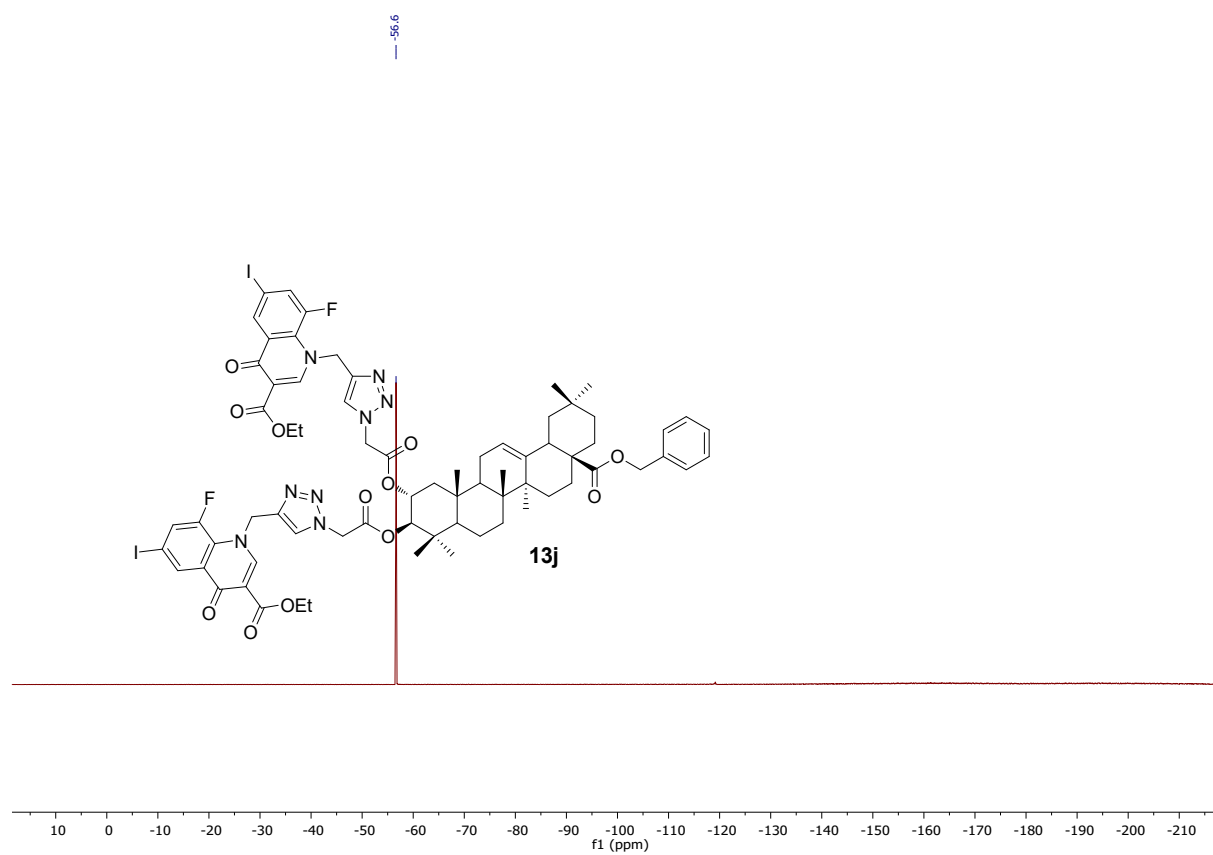

$^{19}\text{F}$  NMR (282 MHz,  $\text{CDCl}_3$ )

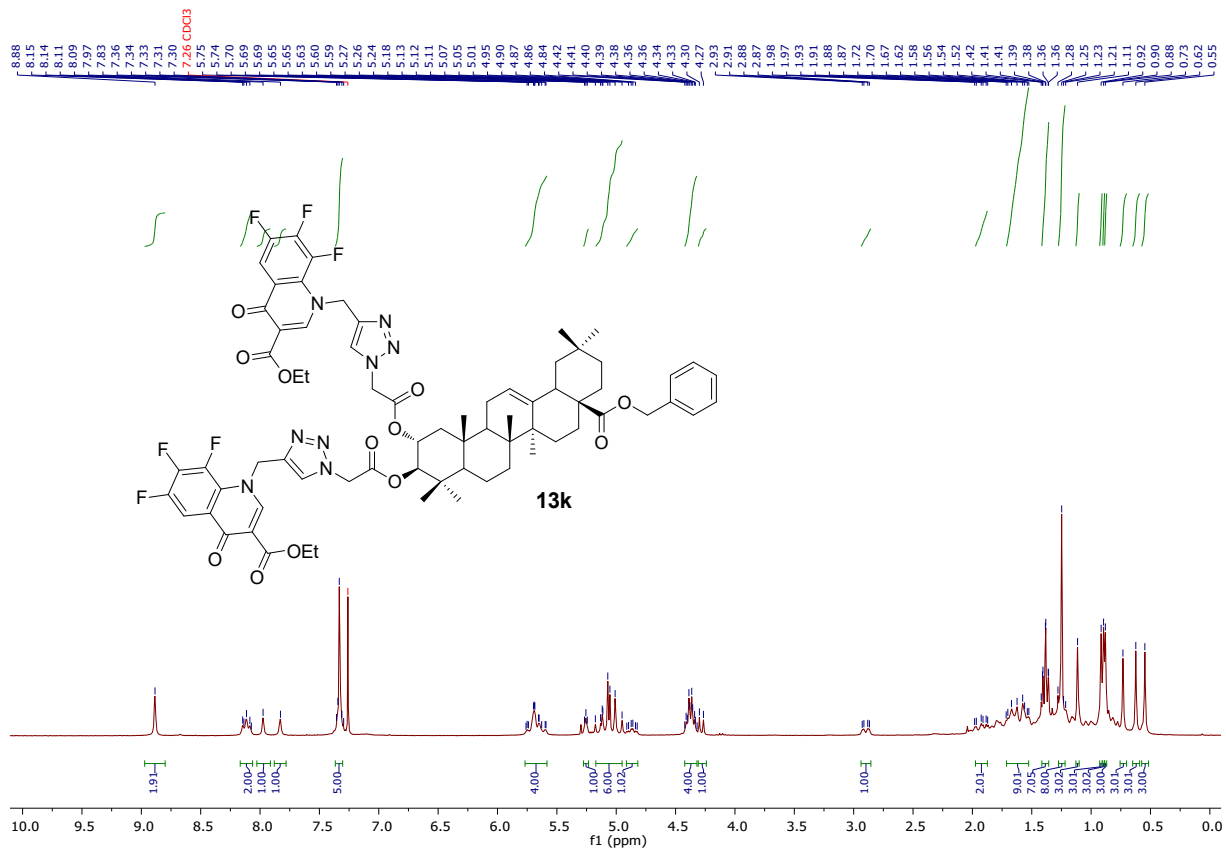

<sup>1</sup>H NMR (300 MHz, CDCl<sub>3</sub>)

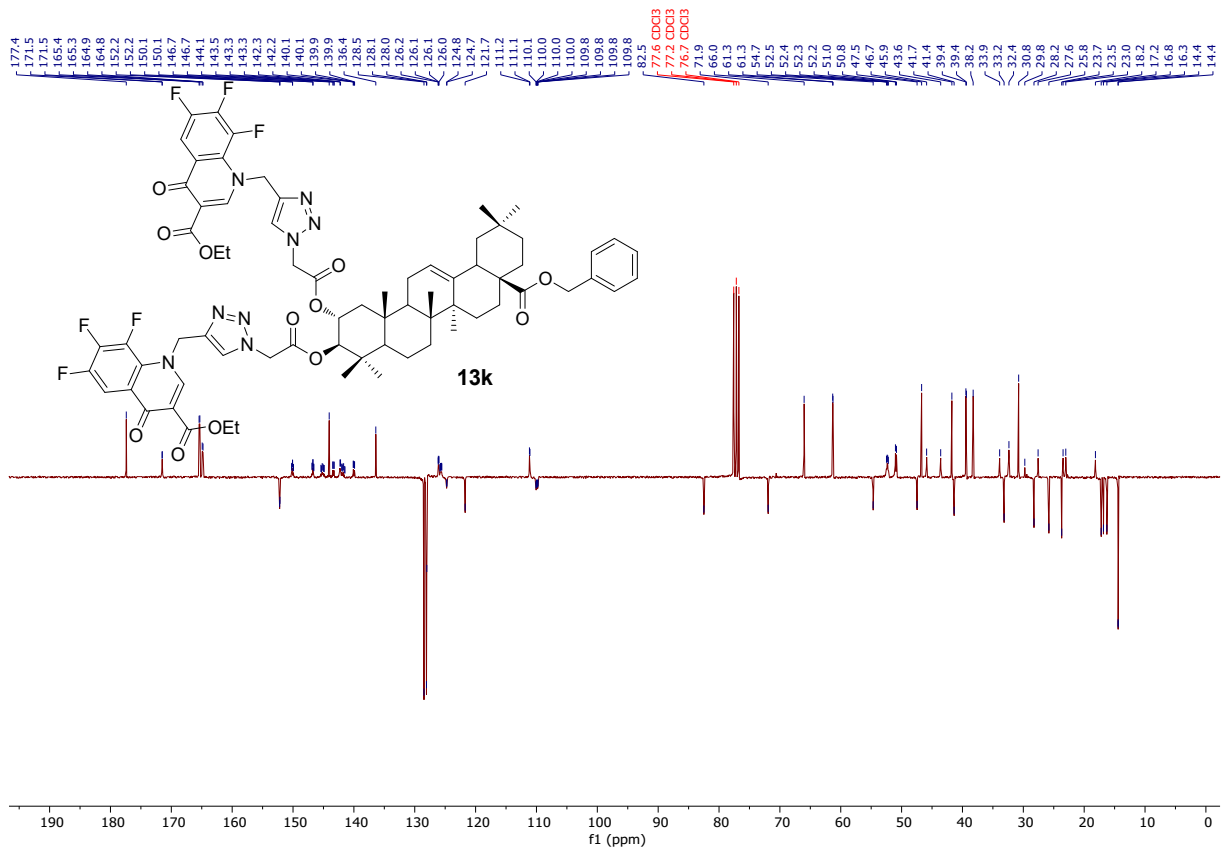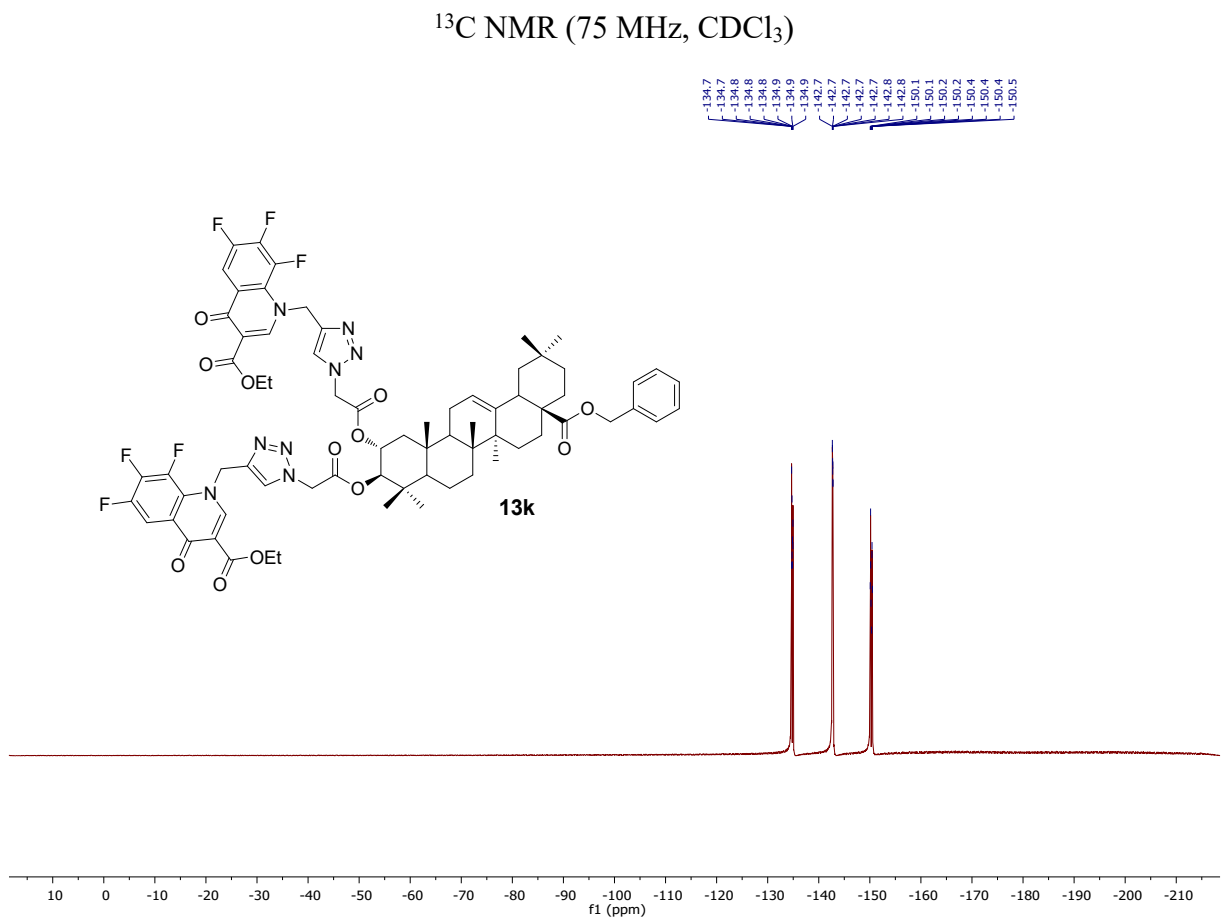



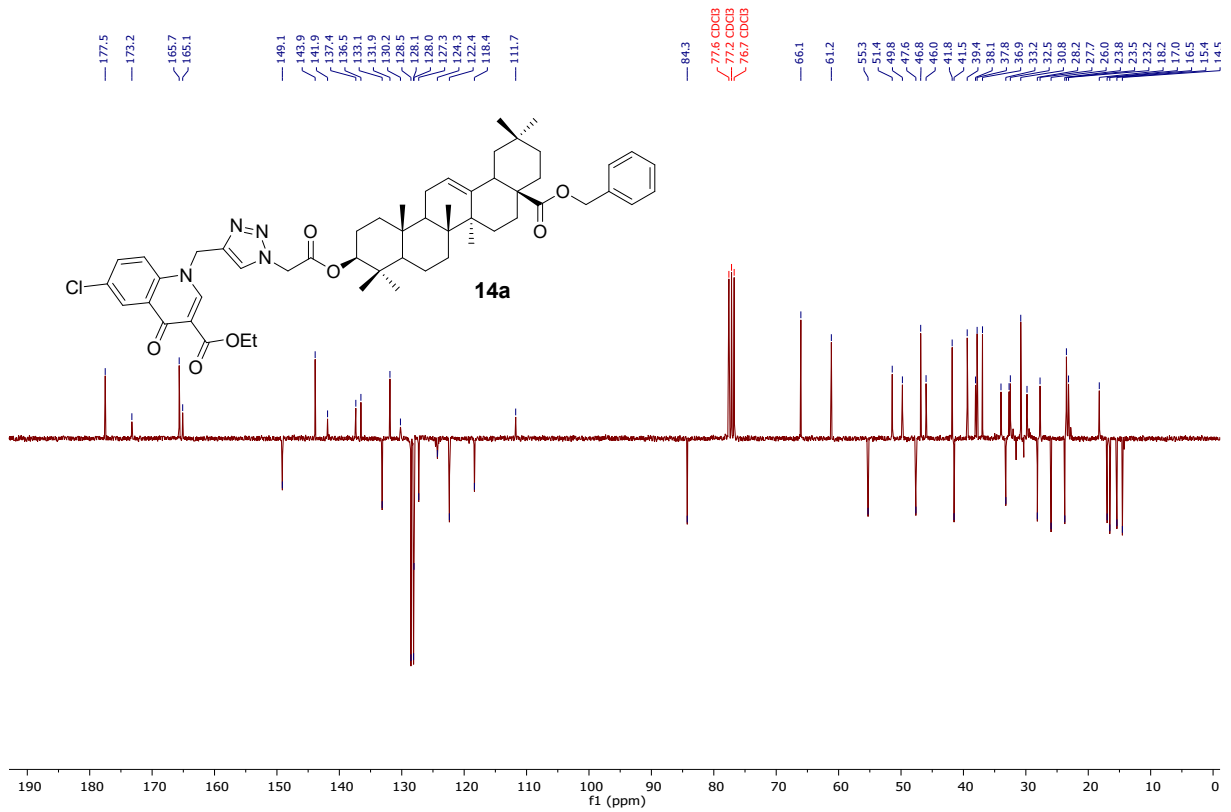

$^{13}\text{C}$  NMR (75 MHz,  $\text{CDCl}_3$ )

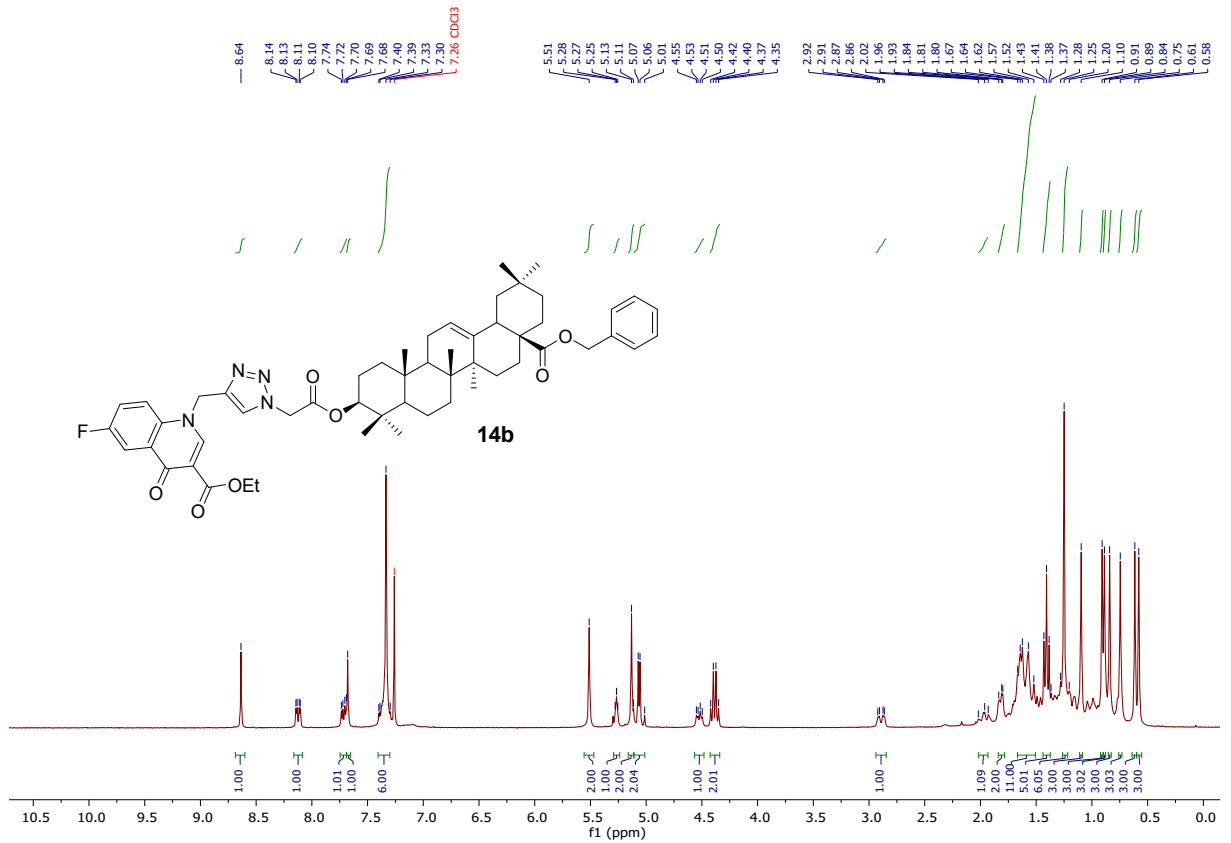



# <sup>1</sup>H NMR (300 MHz, CDCl<sub>3</sub>)

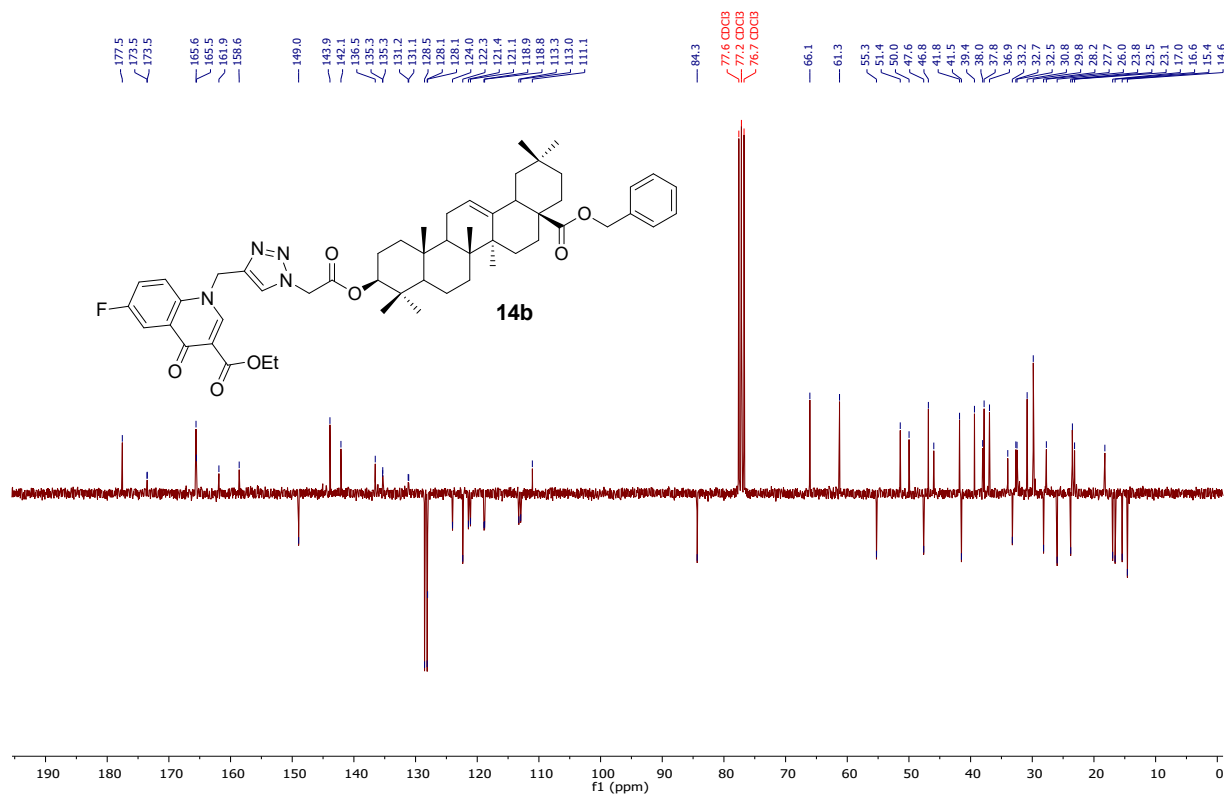

# <sup>13</sup>C NMR (75 MHz, CDCl<sub>3</sub>)

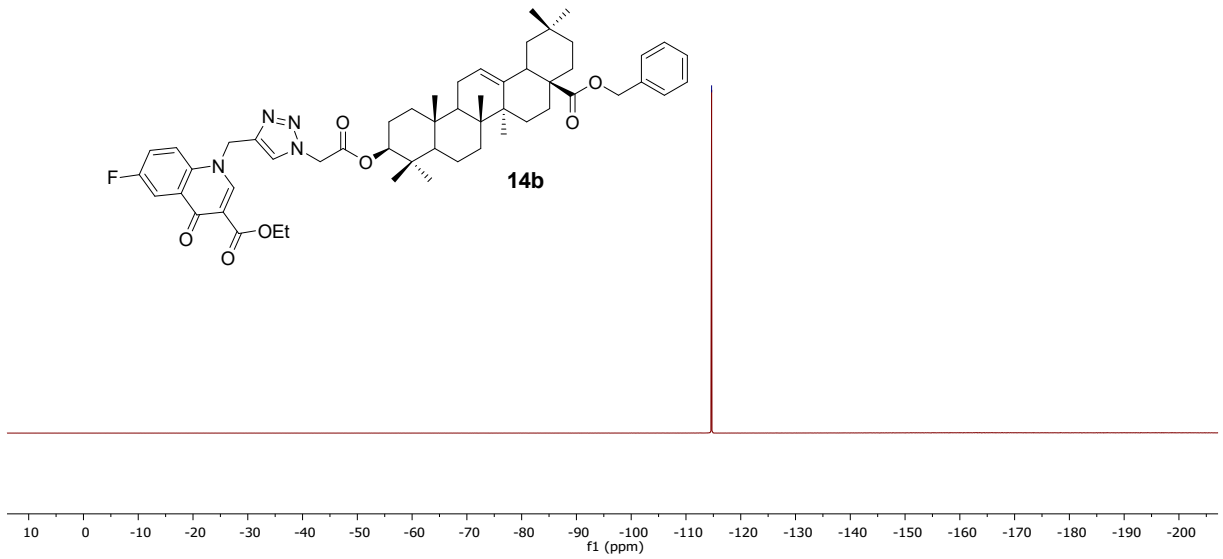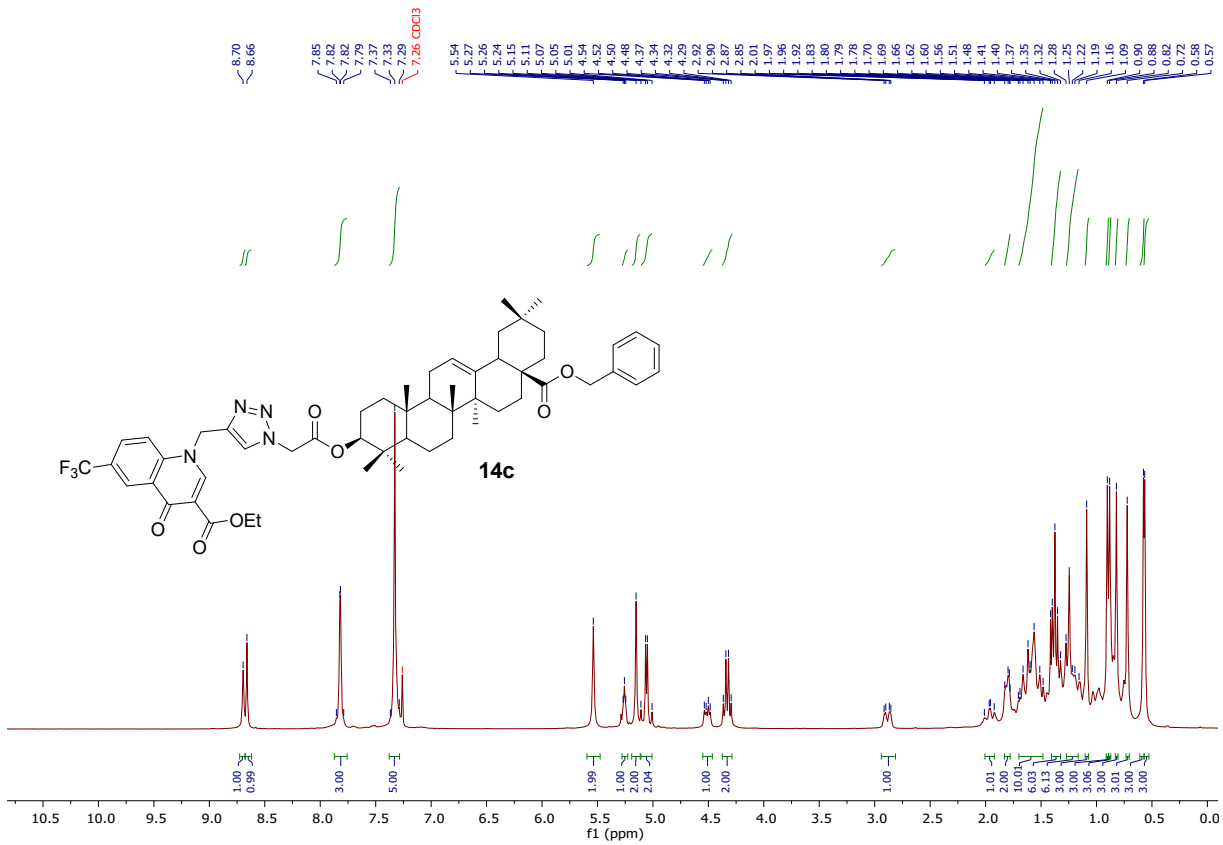

<sup>1</sup>H NMR (300 MHz, CDCl<sub>3</sub>)

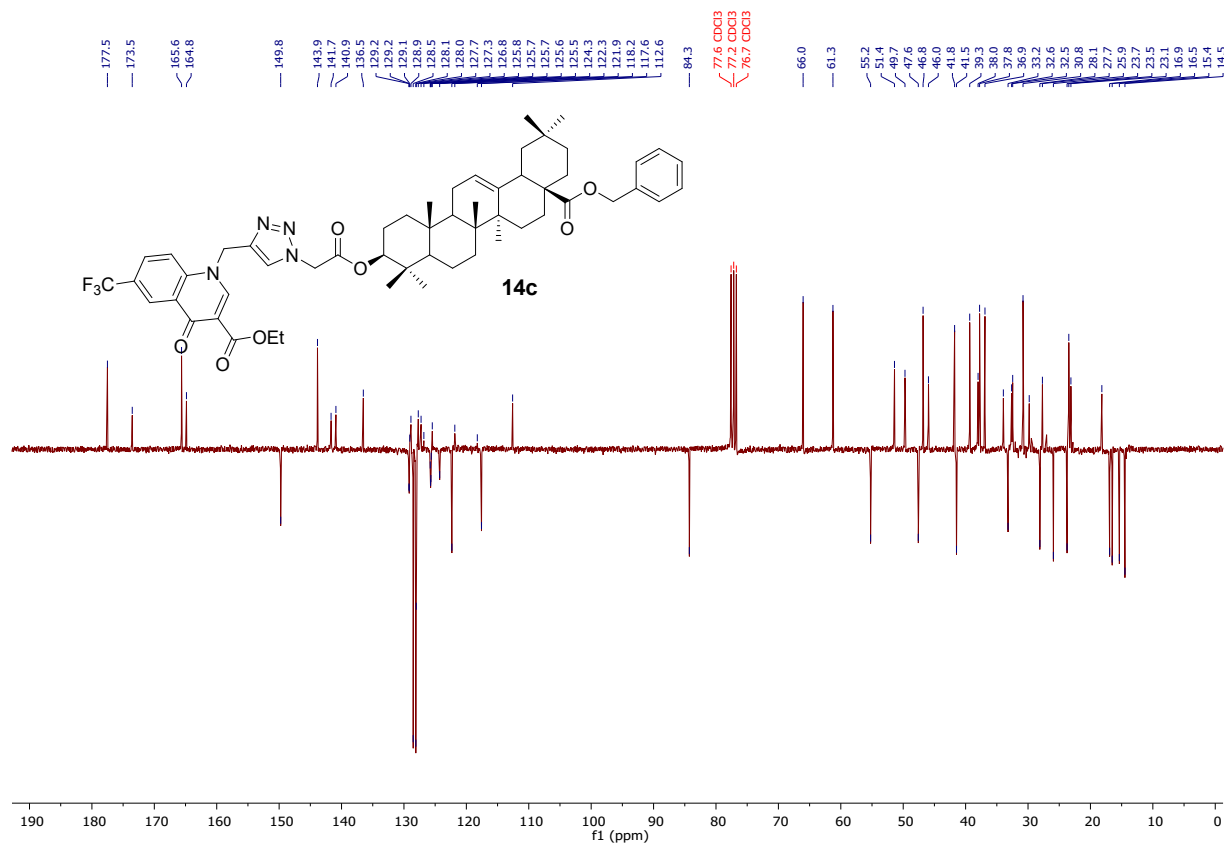

<sup>13</sup>C NMR (75 MHz, CDCl<sub>3</sub>)

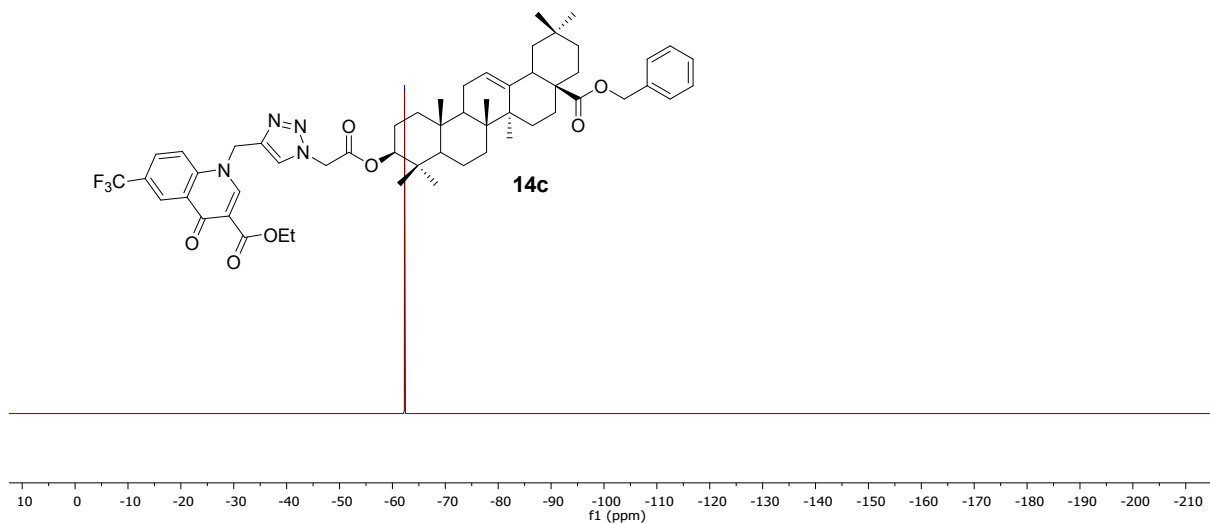

$^{19}\text{F}$  NMR (282 MHz,  $\text{CDCl}_3$ )

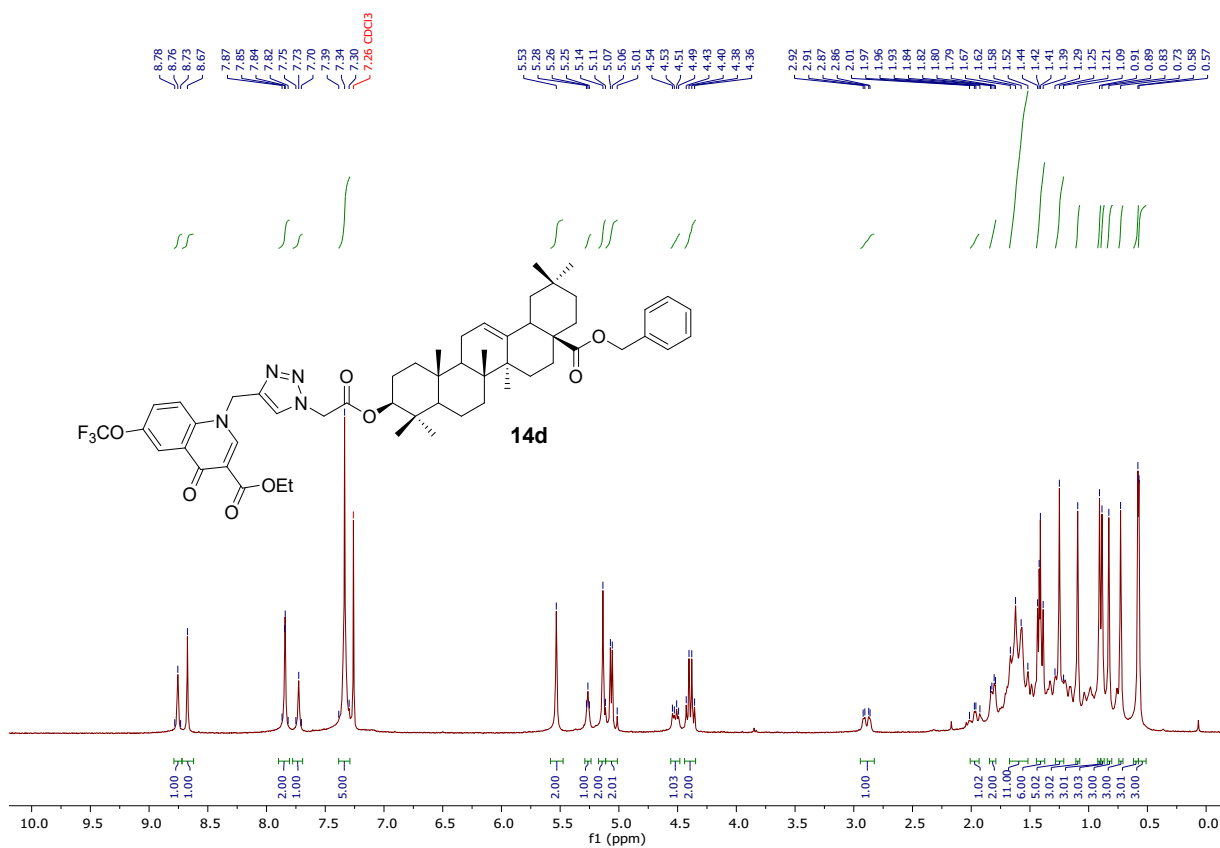

$^1\text{H}$  NMR (300 MHz,  $\text{CDCl}_3$ )

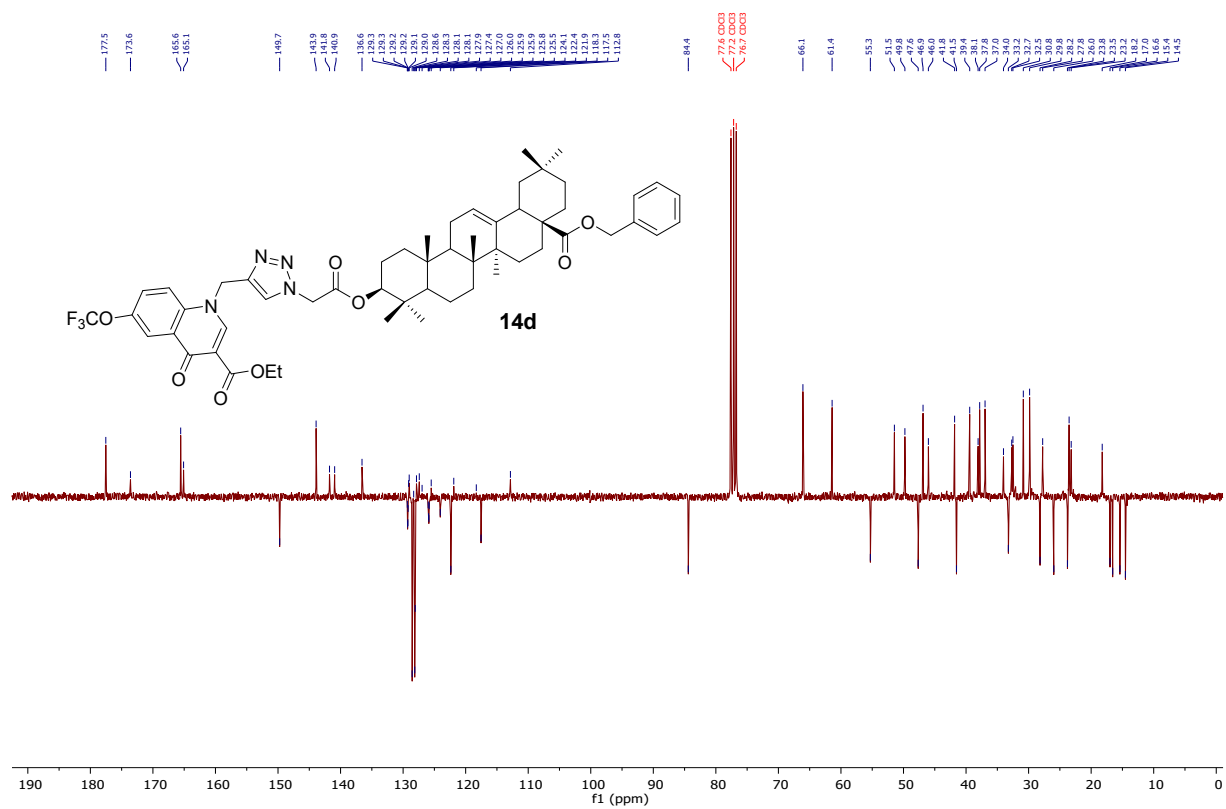

$^{13}\text{C}$  NMR (75 MHz,  $\text{CDCl}_3$ )

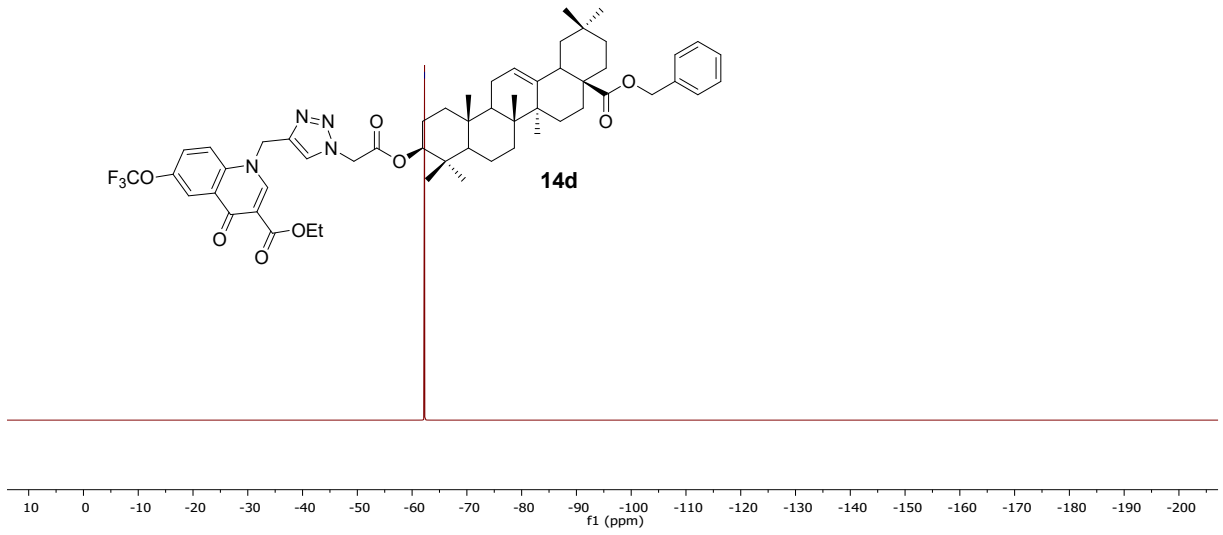

<sup>19</sup>F NMR (282 MHz, CDCl<sub>3</sub>)

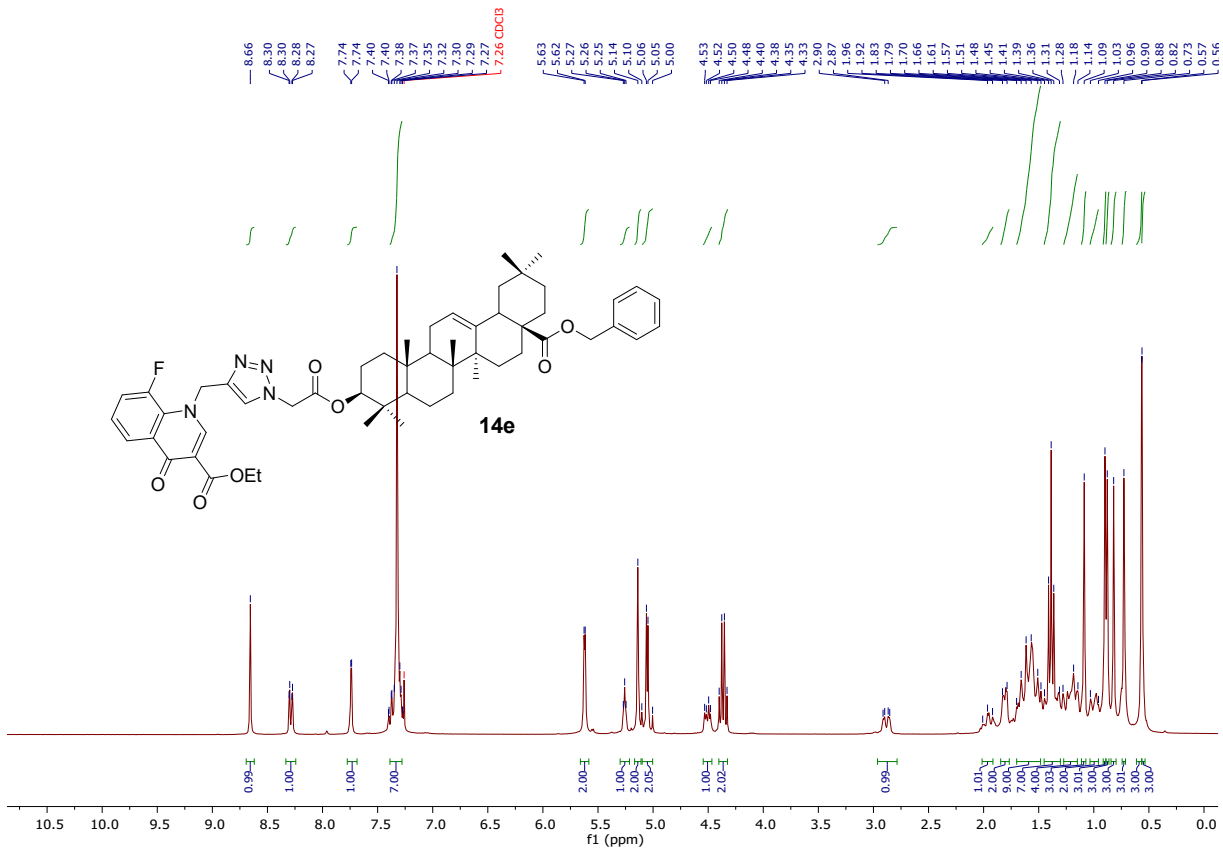

<sup>1</sup>H NMR (300 MHz, CDCl<sub>3</sub>)

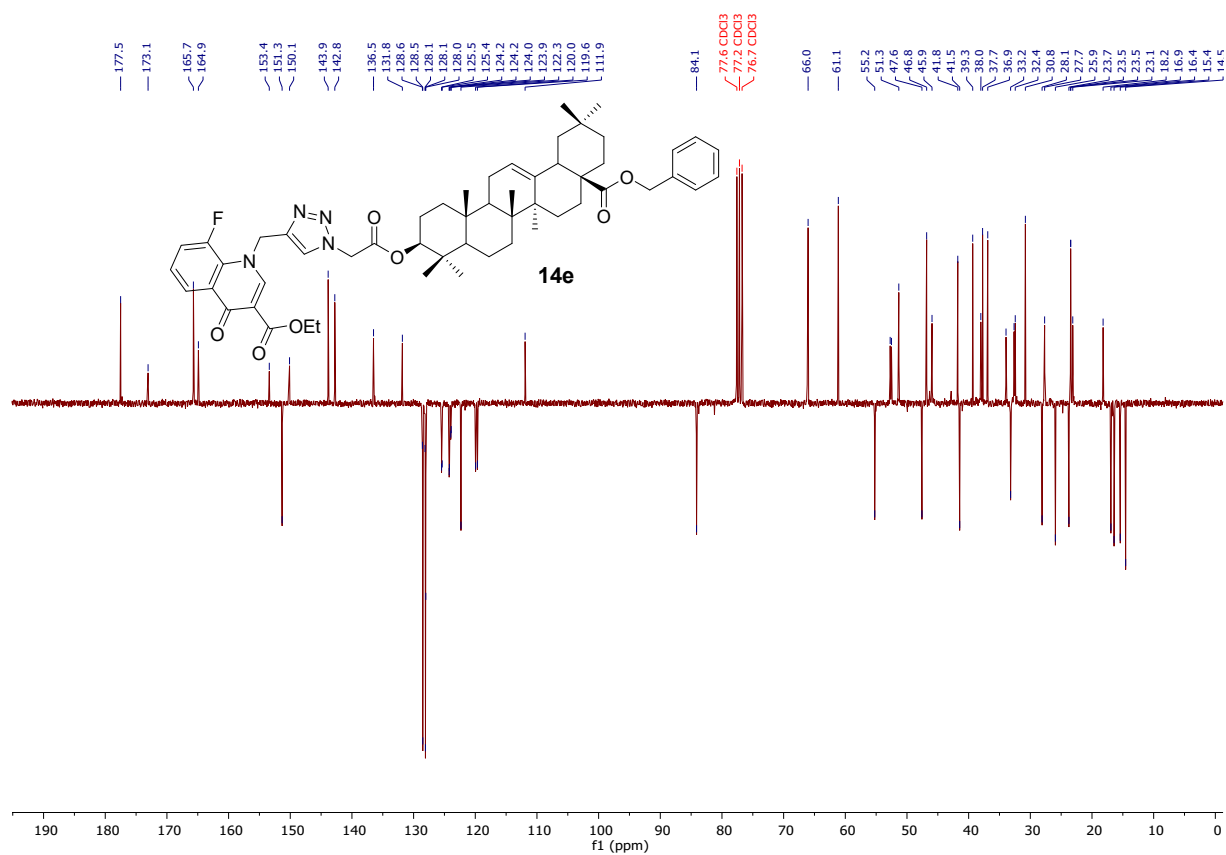

<sup>13</sup>C NMR (75 MHz, CDCl<sub>3</sub>)





### $^1\text{H}$ NMR (300 MHz, $\text{CDCl}_3$ )

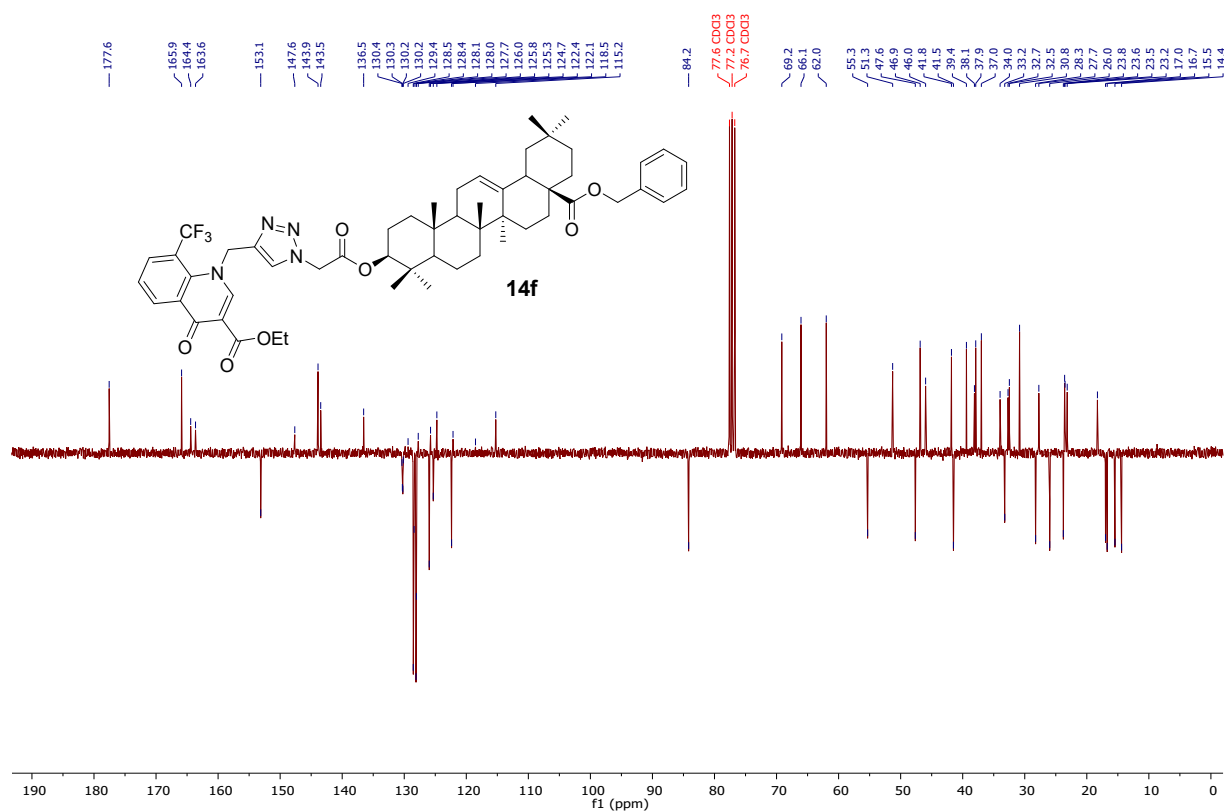

### $^{13}\text{C}$ NMR (75 MHz, $\text{CDCl}_3$ )

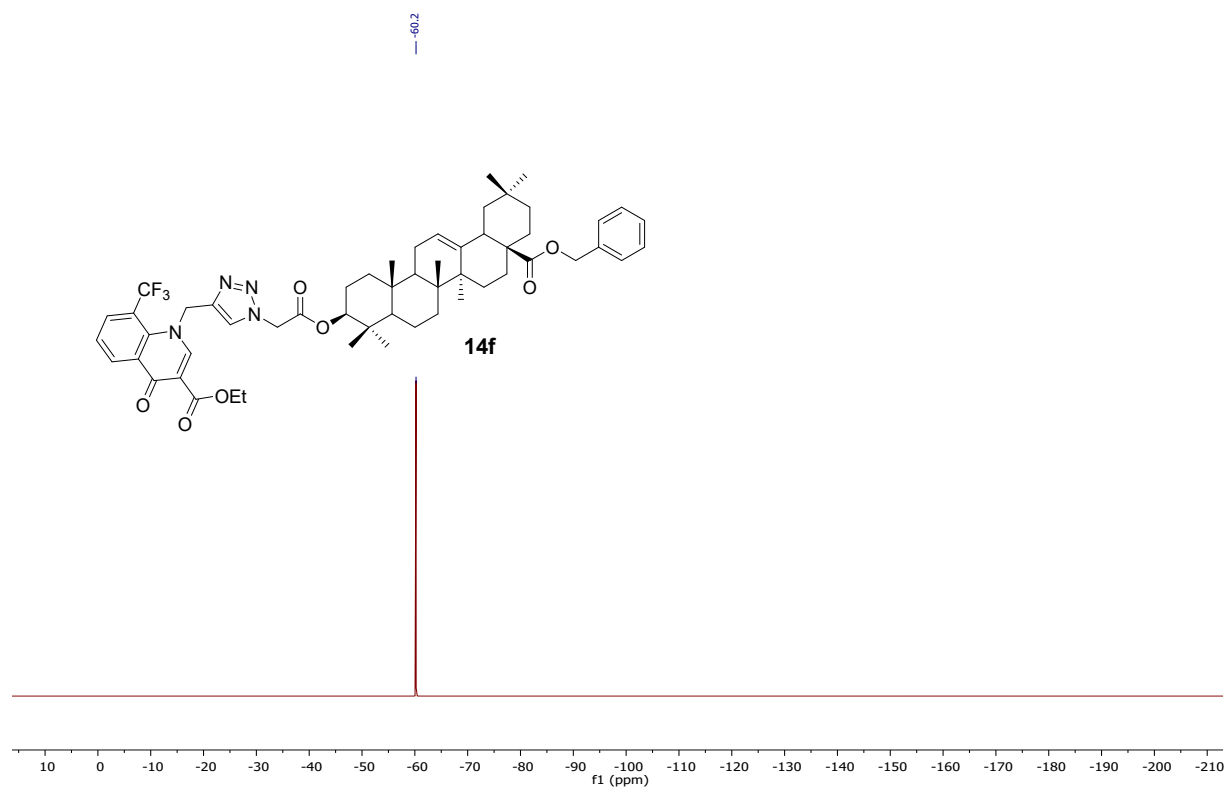

$^{19}\text{F}$  NMR (282 MHz,  $\text{CDCl}_3$ )

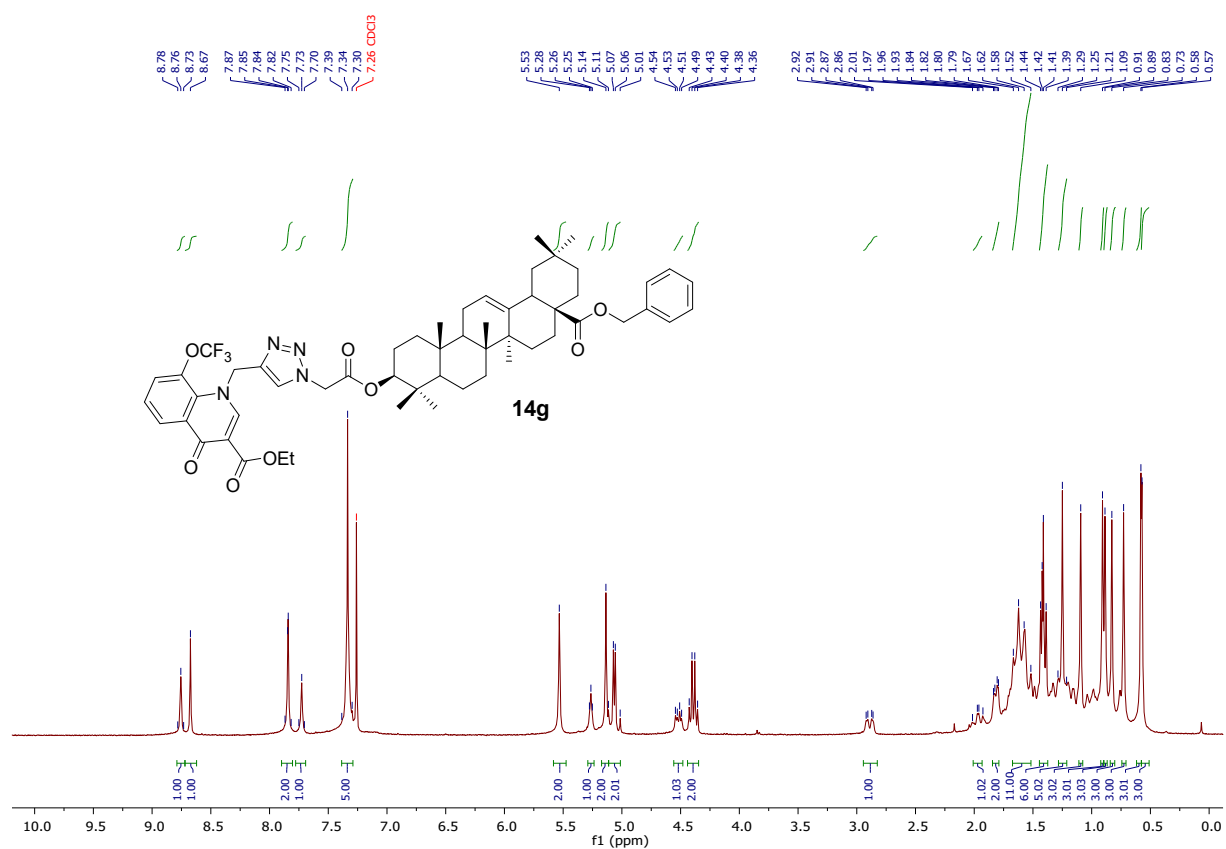

$^1\text{H}$  NMR (300 MHz,  $\text{CDCl}_3$ )

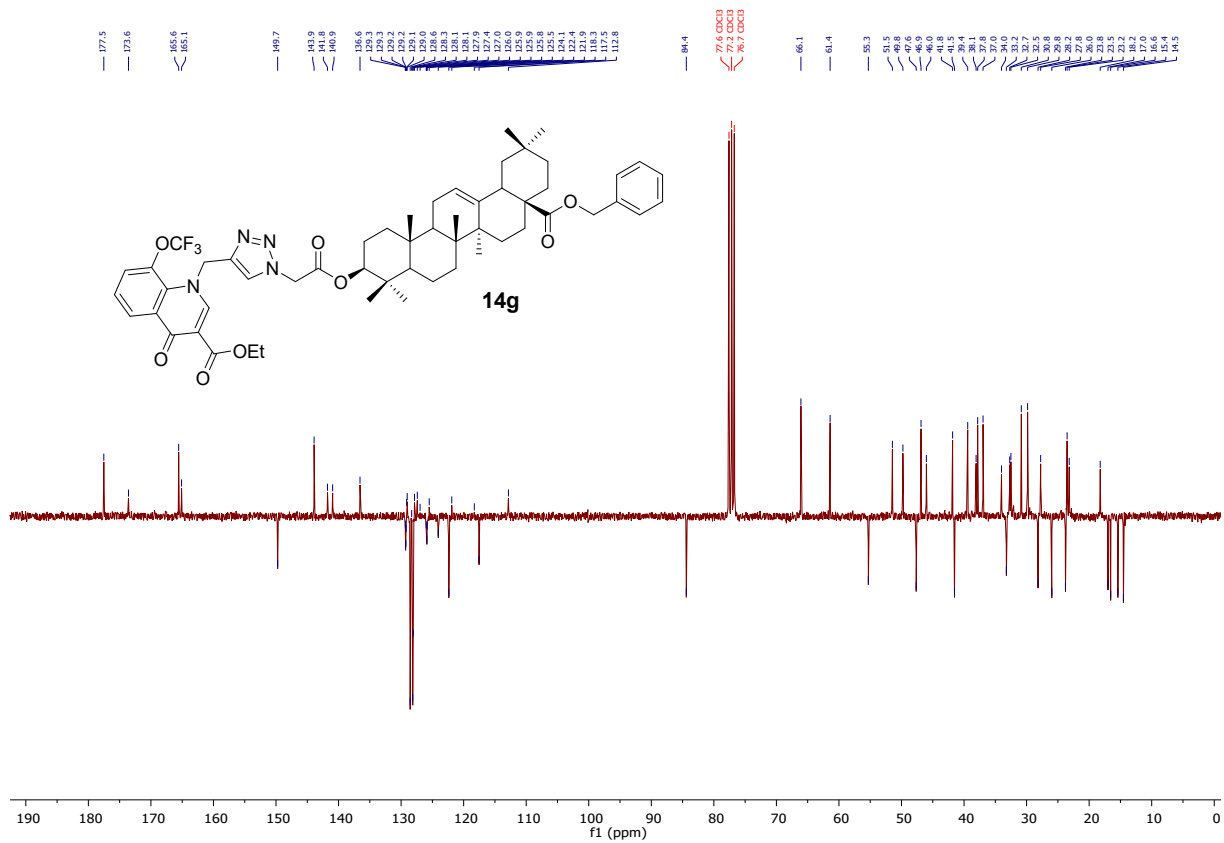

**13C NMR (75 MHz, CDCl<sub>3</sub>)**

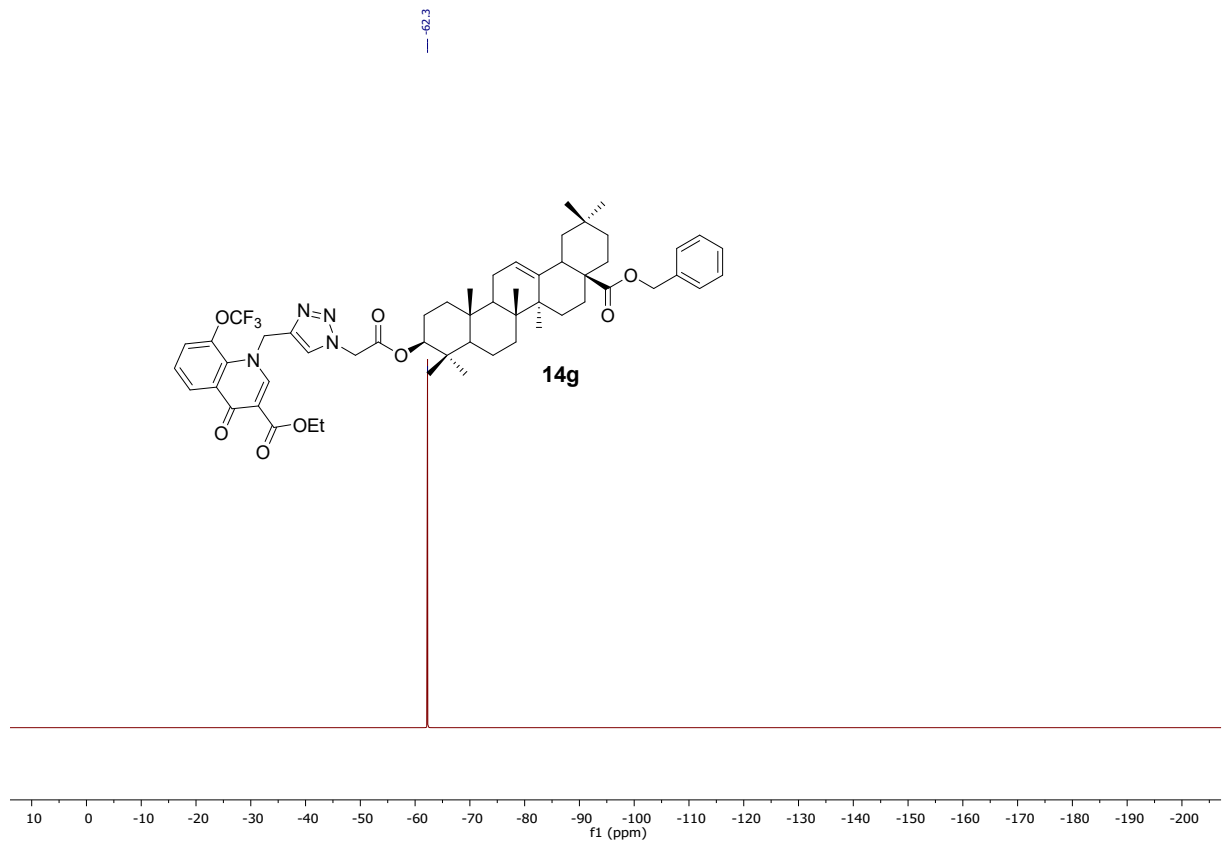

$^{19}\text{F}$  NMR (282 MHz,  $\text{CDCl}_3$ )

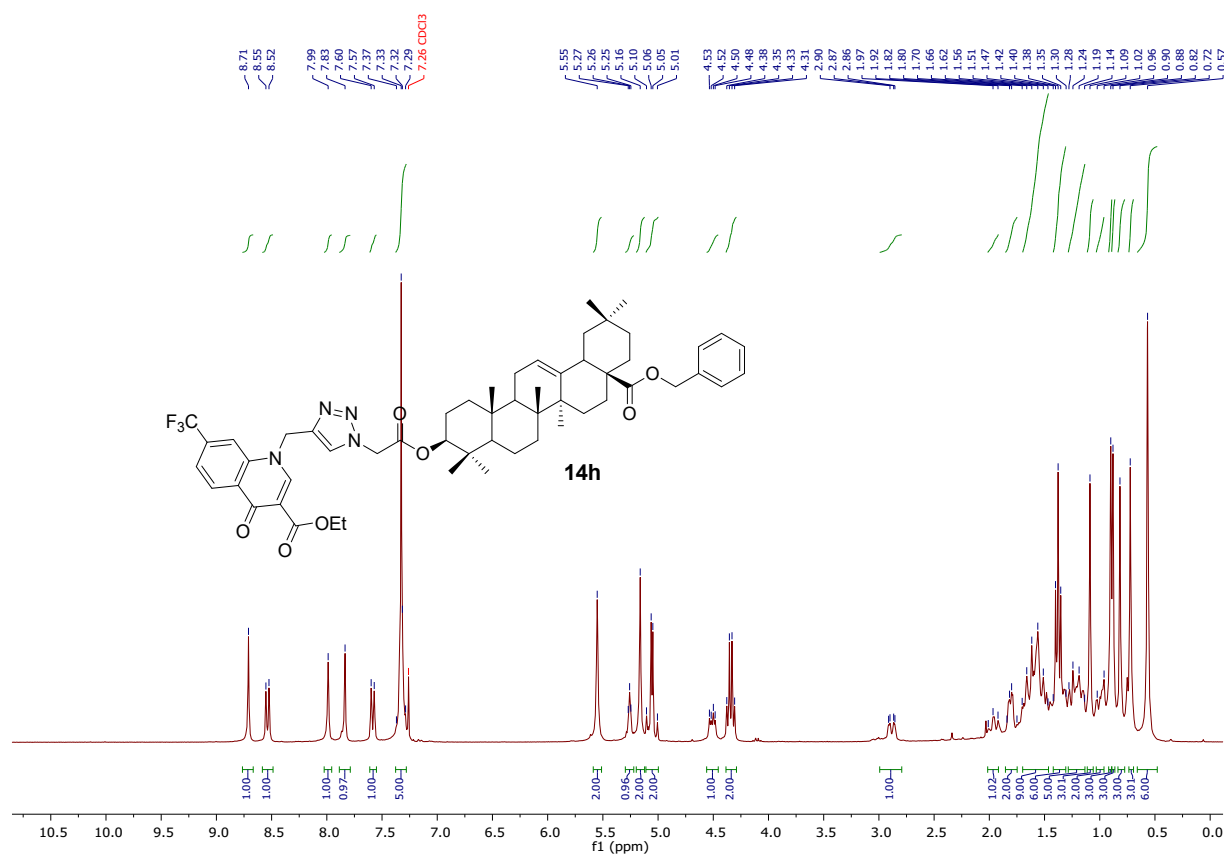

$^1\text{H}$  NMR (300 MHz,  $\text{CDCl}_3$ )

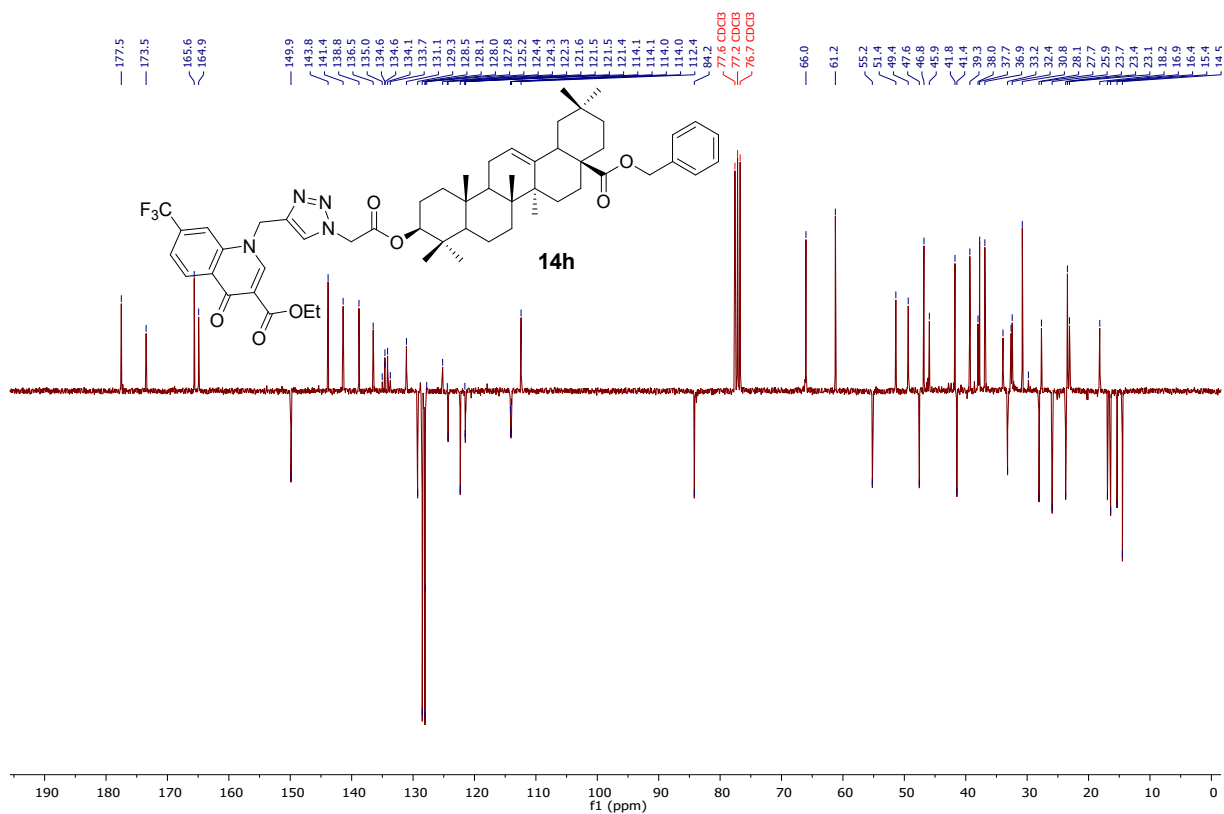

<sup>13</sup>C NMR (75 MHz, CDCl<sub>3</sub>)

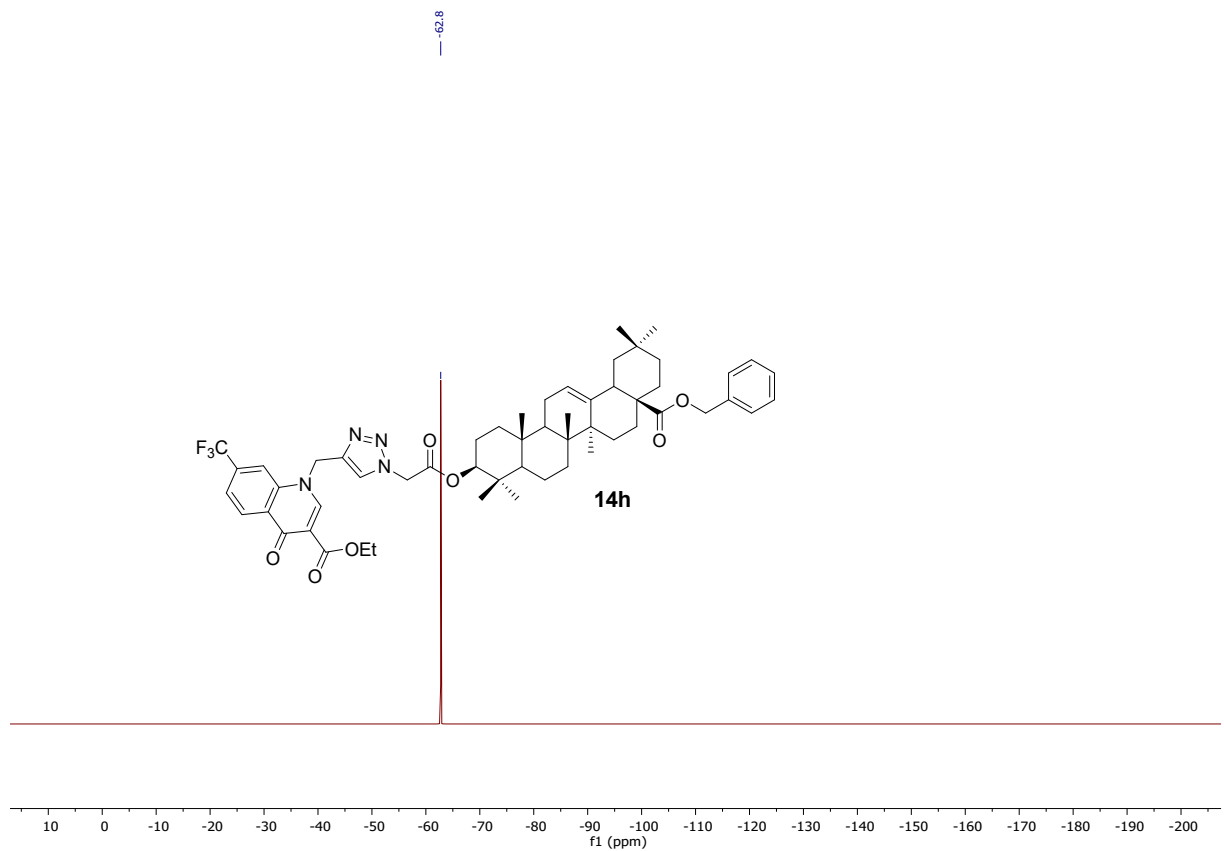

<sup>19</sup>F NMR (282 MHz, CDCl<sub>3</sub>)

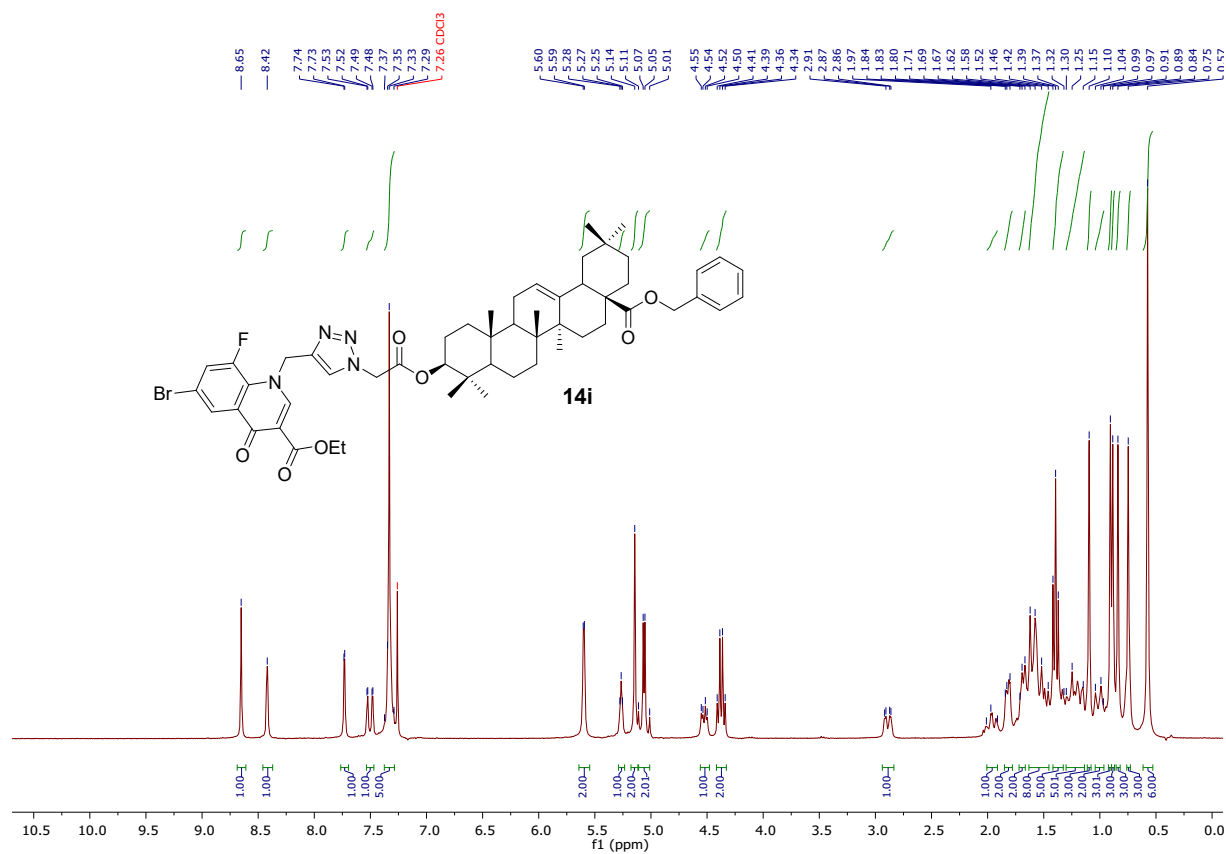

<sup>1</sup>H NMR (300 MHz, CDCl<sub>3</sub>)

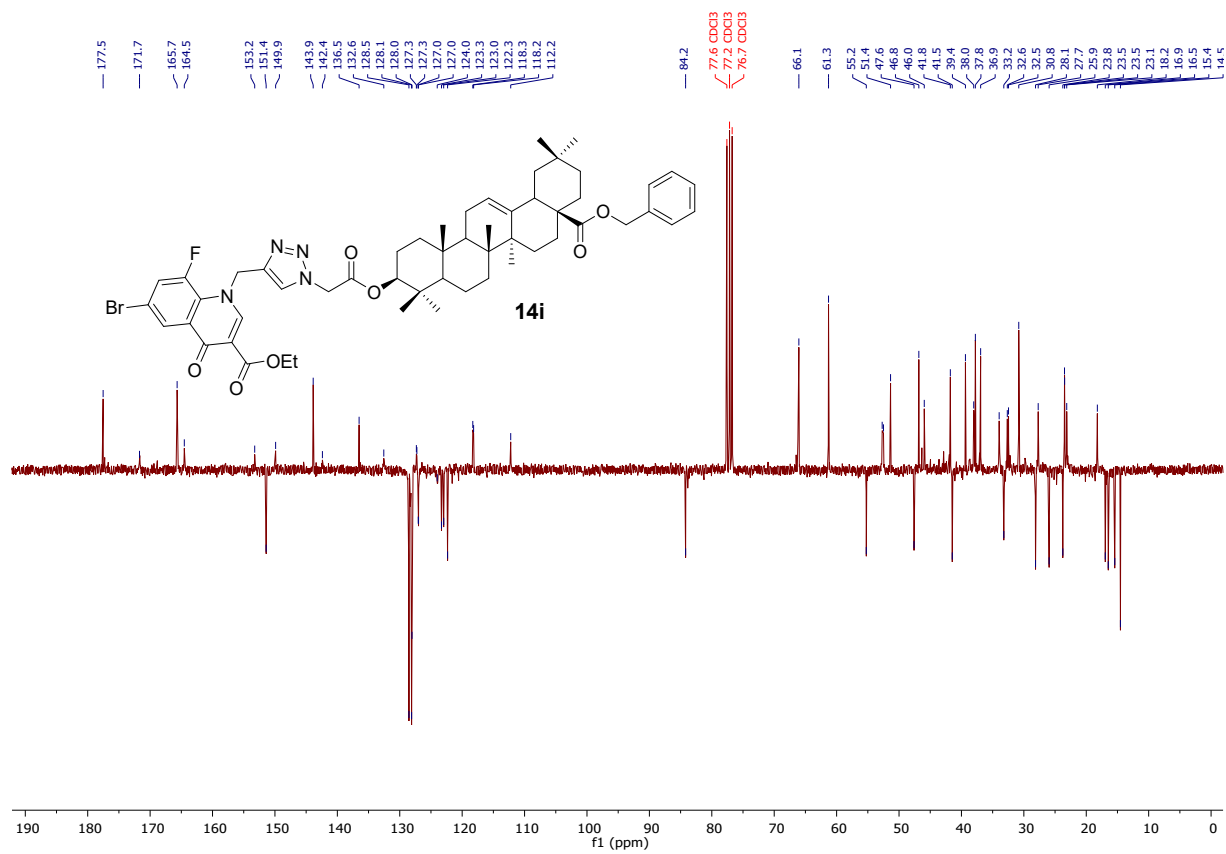

**<sup>13</sup>C NMR (75 MHz, CDCl<sub>3</sub>)**

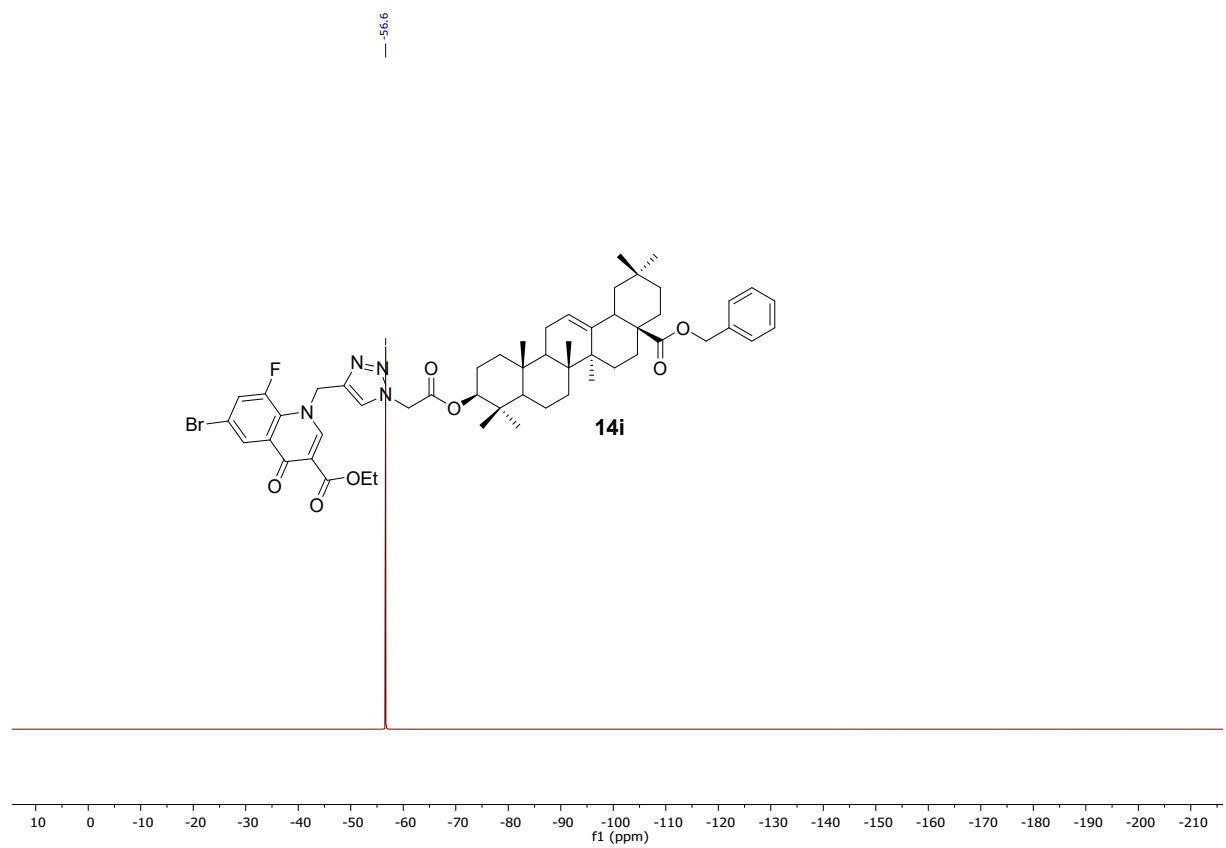

<sup>19</sup>F NMR (282 MHz, CDCl<sub>3</sub>)

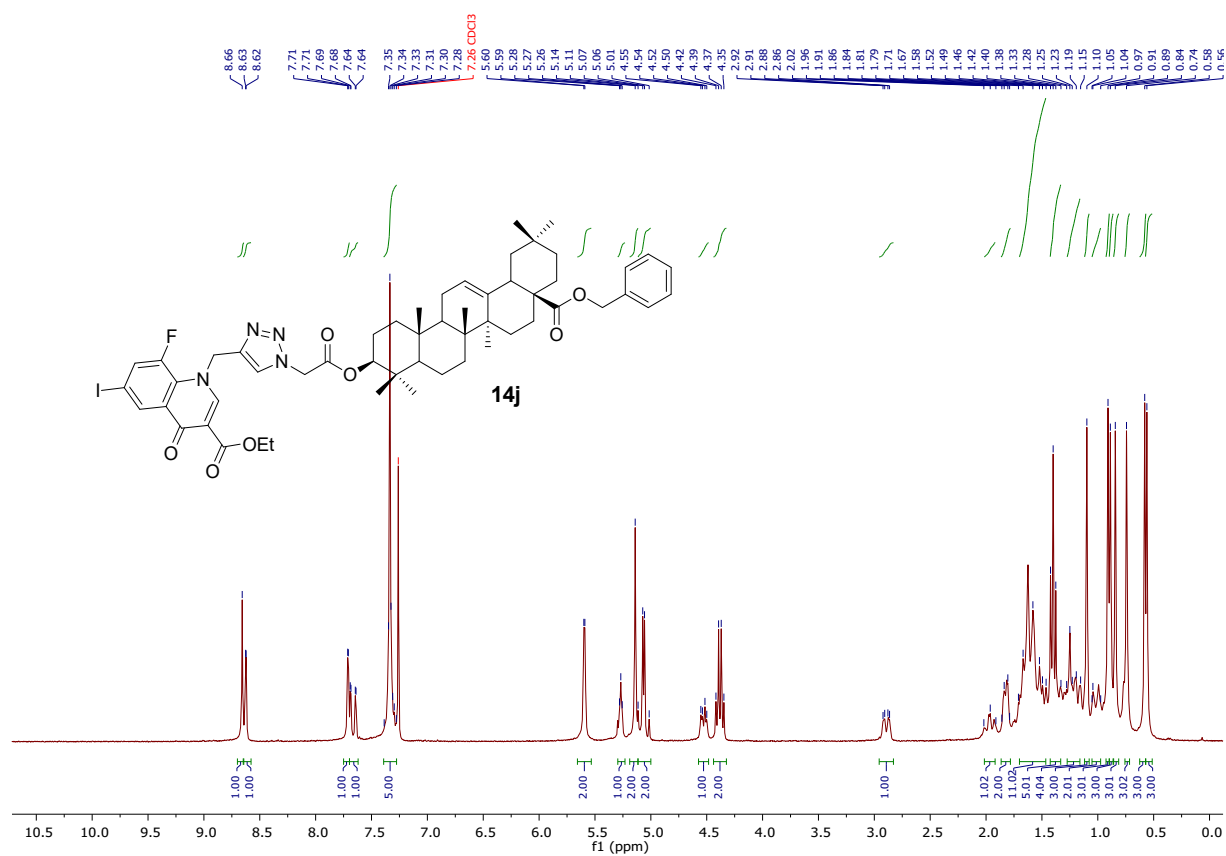

<sup>1</sup>H NMR (300 MHz, CDCl<sub>3</sub>)



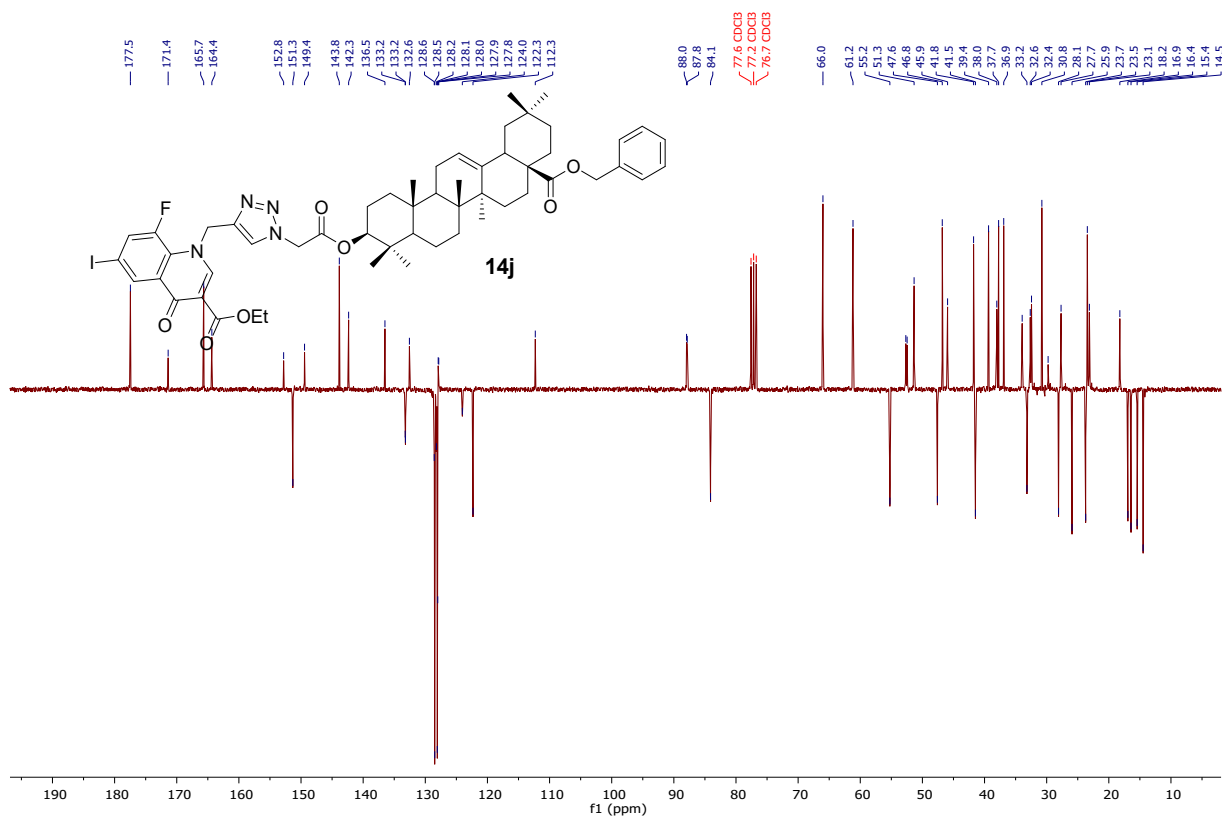

**13C NMR (75 MHz, CDCl<sub>3</sub>)**

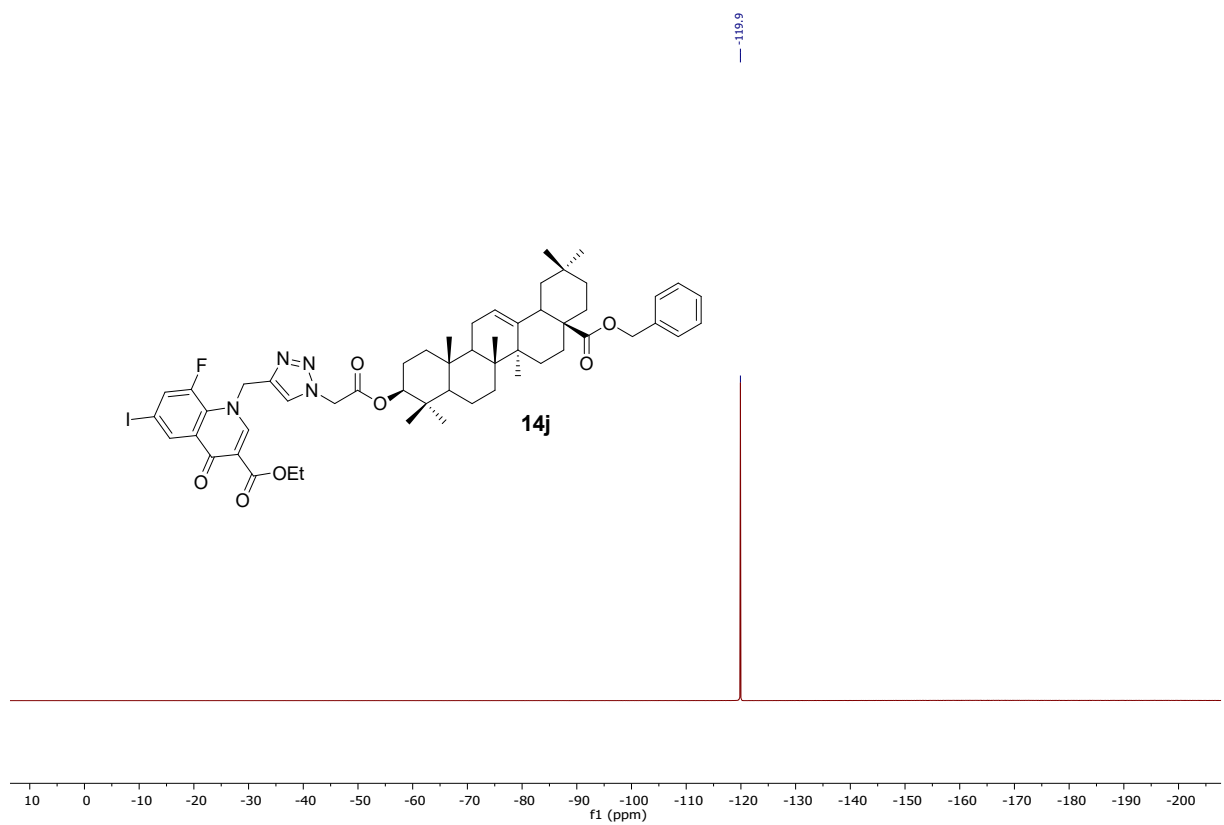

**19F NMR (282 MHz, CDCl<sub>3</sub>)**



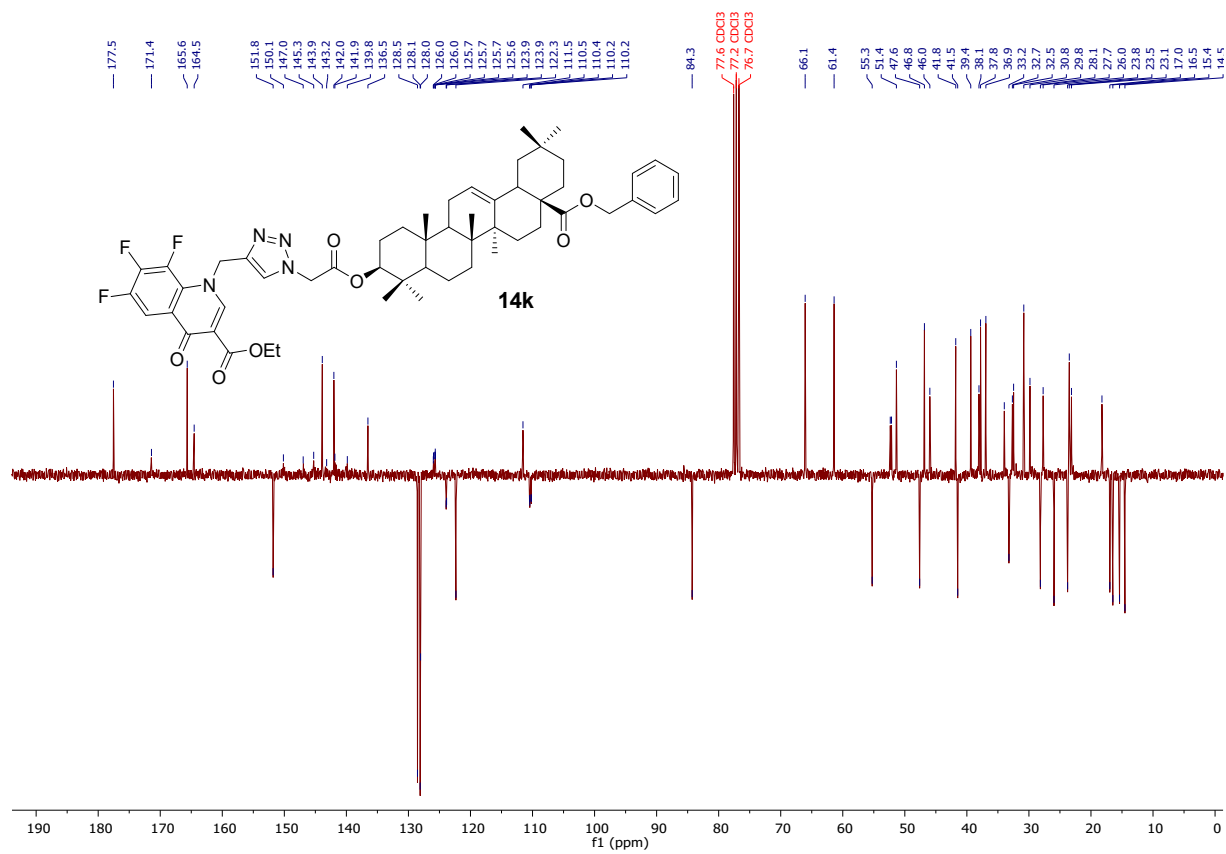

<sup>13</sup>C NMR (75 MHz, CDCl<sub>3</sub>)

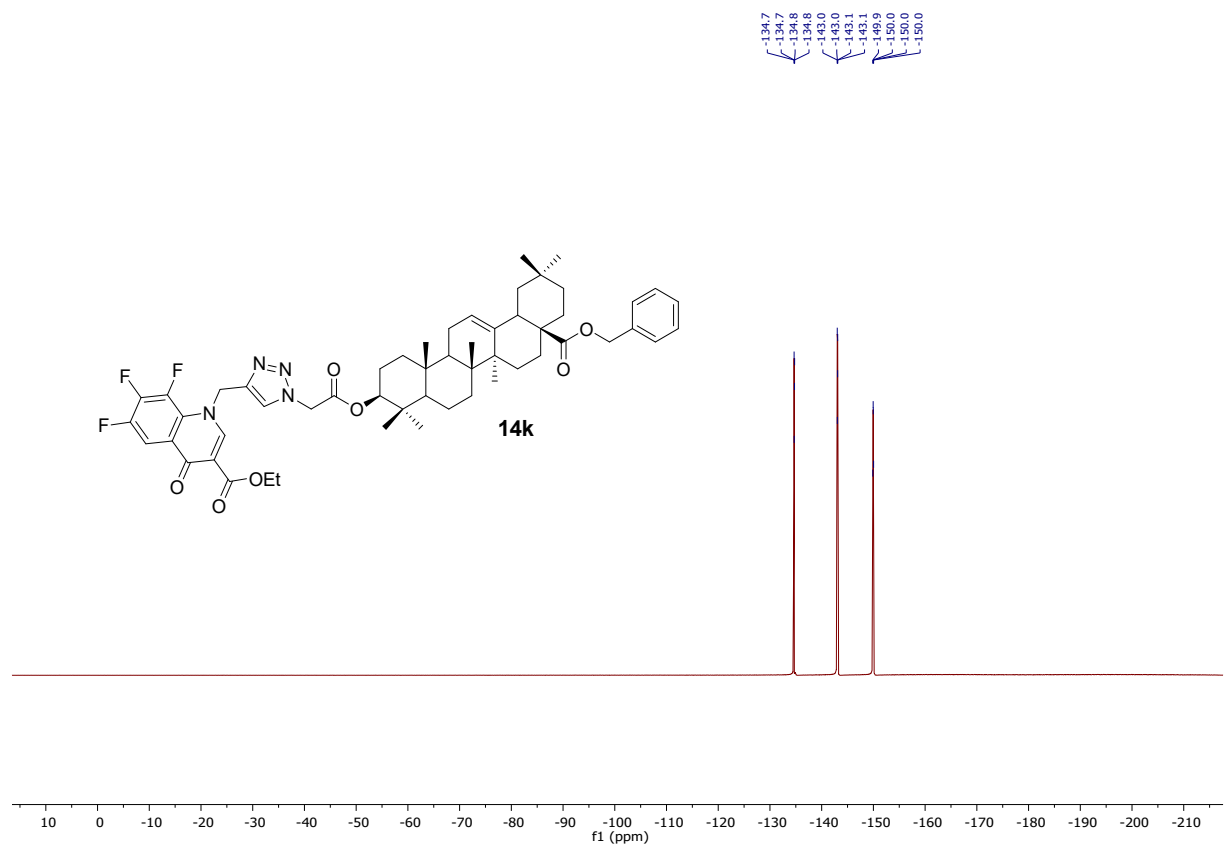

$^{19}\text{F}$  NMR (282 MHz,  $\text{CDCl}_3$ )
